# Supplementary material
Source: Research Square preprint supplement (doi:10.21203/rs.3.rs-9906083/v1)
Supplement: Supplementary file 1 [file 3465b7e89d45a8b20d7b0fd1.xlsx]

## Sheet: scRNAseq DEG
Supplementary Material 1
id	p_val	avg_log2FC	pct.1	pct.2	p_val_adj
CCL19	1.19321e-91	13.8878	0.128	0	2.46948e-87
CXCL9	9.99371e-100	13.0647	0.14	0	2.0683e-95
IDO1	7.90442e-108	12.5685	0.151	0	1.6359e-103
CXCL11	1.43284e-63	10.3081	0.089	0	2.96541e-59
EBI3	7.2493e-201	9.85994	0.283	0.001	1.50032e-196
CCL17	1.55127e-26	9.71961	0.036	0	3.2105e-22
LAD1	1.43738e-75	9.61543	0.106	0	2.97481e-71
ZBTB7B	1.16358e-191	9.56159	0.266	0	2.40815e-187
LAMP3	2.28496e-88	9.20439	0.128	0.001	4.72896e-84
CCL22	1.73353e-30	9.19758	0.042	0	3.58772e-26
ADAMTS2	9.15292e-288	8.89502	0.4	0.001	1.89429e-283
CXCL10	1.10172e-74	8.76051	0.111	0.001	2.28013e-70
TIMP4	3.04854e-78	8.47947	0.109	0	6.30926e-74
UBD	1.39442e-59	8.45511	0.083	0	2.8859e-55
CD274	3.99956e-108	8.22668	0.16	0.001	8.27748e-104
TFPI2	4.80797e-08	7.9603	0.009	0	0.000995057
GPER1	3.12102e-66	7.8352	0.092	0	6.45927e-62
GLDN	1.19358e-47	7.68307	0.066	0	2.47024e-43
CCL23	1.55127e-26	7.65168	0.036	0	3.2105e-22
MAOA	1.27216e-51	7.61917	0.072	0	2.63287e-47
LINC00158	4.00997e-33	7.48666	0.045	0	8.29904e-29
CTGF	5.90007e-21	7.30535	0.03	0	1.22108e-16
MT1M	1.23917e-18	7.2502	0.025	0	2.5646e-14
TNIP3	4.00997e-33	7.19372	0.045	0	8.29904e-29
C1QC	4.5016e-90	7.18269	0.142	0.002	9.31651e-86
TCTEX1D1	1.19358e-47	7.17221	0.066	0	2.47024e-43
HMSD	2.54751e-52	7.16504	0.077	0.001	5.27234e-48
AC004556.1	1.9264e-34	7.07301	0.047	0	3.98688e-30
ALOX15B	7.03612e-75	6.95795	0.109	0.001	1.45619e-70
VCAM1	1.12165e-14	6.89308	0.019	0	2.32136e-10
AMPH	4.43421e-37	6.86372	0.051	0	9.17705e-33
ALPL	2.87312e-21	6.82787	0.028	0	5.94621e-17
MUCL1	1.05397e-06	6.81592	0.008	0	0.0218129
MMP8	1.55127e-26	6.74774	0.036	0	3.2105e-22
ANKRD22	1.56612e-65	6.73099	0.096	0.001	3.24125e-61
IDO2	6.67542e-24	6.62228	0.032	0	1.38155e-19
GGT5	1.12165e-14	6.56899	0.019	0	2.32136e-10
PCOLCE2	3.2182e-25	6.43624	0.034	0	6.66039e-21
EPDR1	2.87312e-21	6.40589	0.028	0	5.94621e-17
CD177	2.34973e-13	6.38505	0.017	0	4.863e-09
C1QB	1.08577e-107	6.38028	0.189	0.006	2.2471e-103
BCL2L14	3.46069e-68	6.293	0.1	0.001	7.16224e-64
HSD11B1	2.22987e-09	6.24444	0.011	0	4.61494e-05
EHF	9.38834e-33	6.23199	0.047	0	1.94301e-28
VSIG4	1.47144e-235	6.22558	0.37	0.007	3.04528e-231
AC098613.1	6.67542e-24	6.22492	0.032	0	1.38155e-19
MT1H	2.22987e-09	6.18175	0.011	0	4.61494e-05
LYVE1	2.22987e-09	6.13233	0.011	0	4.61494e-05
IL1R2	0	6.12564	0.781	0.036	0
AL035446.1	5.37081e-16	6.06736	0.021	0	1.11154e-11
CELA1	2.71762e-43	6.06612	0.062	0	5.6244e-39
CRYBB2	3.2182e-25	6.03547	0.034	0	6.66039e-21
UTS2	3.78778e-71	6.01461	0.102	0	7.83919e-67
PDCD1LG2	1.91186e-31	5.96914	0.045	0	3.95679e-27
LRRC1	1.12165e-14	5.80485	0.019	0	2.32136e-10
METTL7B	4.94304e-12	5.77609	0.015	0	1.02301e-07
DEPP1	4.94304e-12	5.76608	0.015	0	1.02301e-07
CYP19A1	1.59808e-86	5.73683	0.128	0.001	3.30739e-82
COX7A1	2.34973e-13	5.64646	0.017	0	4.863e-09
CLEC3B	1.12165e-14	5.62141	0.019	0	2.32136e-10
GRIN2D	5.37081e-16	5.61286	0.021	0	1.11154e-11
DAAM2	1.60451e-56	5.60236	0.081	0	3.3207e-52
SYNPO2	1.37377e-28	5.57903	0.043	0.001	2.84315e-24
TWIST1	2.22987e-09	5.56438	0.011	0	4.61494e-05
MREG	4.87491e-60	5.54906	0.109	0.004	1.00891e-55
SIGLEC12	1.28793e-120	5.54846	0.185	0.002	2.6655e-116
PLOD2	4.94304e-12	5.53455	0.015	0	1.02301e-07
C3orf52	2.22987e-09	5.51738	0.011	0	4.61494e-05
SLC26A4-AS1	1.04577e-10	5.48923	0.013	0	2.16432e-06
AL356056.2	4.94304e-12	5.45509	0.015	0	1.02301e-07
XCR1	2.22987e-09	5.44807	0.011	0	4.61494e-05
CFB	2.34973e-13	5.43028	0.017	0	4.863e-09
CYB5R2	3.30431e-56	5.42812	0.083	0.001	6.83859e-52
HPGD	1.25301e-160	5.38676	0.255	0.004	2.59323e-156
AC087273.2	2.34973e-13	5.37715	0.017	0	4.863e-09
GJA1	4.80797e-08	5.36392	0.009	0	0.000995057
AC092484.1	2.34973e-13	5.35961	0.017	0	4.863e-09
TIMP3	1.04577e-10	5.34151	0.013	0	2.16432e-06
UBA6-AS1	1.25938e-19	5.33363	0.028	0	2.60642e-15
ACKR3	8.38971e-99	5.3295	0.162	0.003	1.73633e-94
IFI27	4.40437e-12	5.30876	0.023	0.001	9.11527e-08
ZNF366	4.94304e-12	5.3043	0.015	0	1.02301e-07
APOL4	4.80797e-08	5.27773	0.009	0	0.000995057
CCL26	1.04577e-10	5.27389	0.013	0	2.16432e-06
NOTCH3	1.04577e-10	5.26773	0.013	0	2.16432e-06
PRTN3	1.04577e-10	5.24801	0.013	0	2.16432e-06
AC074327.1	2.16922e-14	5.24277	0.021	0	4.48943e-10
CA4	4.80797e-08	5.22669	0.009	0	0.000995057
EMP2	4.94304e-12	5.20392	0.015	0	1.02301e-07
RAB42	2.34973e-13	5.19664	0.017	0	4.863e-09
MS4A3	2.60002e-18	5.19136	0.026	0	5.381e-14
BEAN1	4.80797e-08	5.15944	0.009	0	0.000995057
CCNA1	1.04577e-10	5.15459	0.013	0	2.16432e-06
GJA4	1.05397e-06	5.11347	0.008	0	0.0218129
ATP13A4	4.80797e-08	5.10293	0.009	0	0.000995057
DSG2	2.21921e-14	5.10271	0.025	0.001	4.59288e-10
SLC12A8	1.04577e-10	5.07913	0.013	0	2.16432e-06
ENPP2	4.42247e-40	5.06894	0.068	0.002	9.15274e-36
NES	1.05397e-06	5.04908	0.008	0	0.0218129
AL590068.1	2.22987e-09	5.00998	0.011	0	4.61494e-05
AOC1	1.05397e-06	5.00364	0.008	0	0.0218129
AC007182.1	1.04577e-10	5.00204	0.013	0	2.16432e-06
ABLIM3	2.96306e-61	4.98272	0.092	0.001	6.13235e-57
PLA2G4C	2.60923e-18	4.971	0.026	0	5.40007e-14
EHHADH	1.04577e-10	4.9646	0.013	0	2.16432e-06
CDH5	1.04577e-10	4.96059	0.013	0	2.16432e-06
AC080023.1	1.04577e-10	4.96016	0.013	0	2.16432e-06
HAPLN3	3.83516e-79	4.95402	0.168	0.01	7.93725e-75
TIFAB	2.22987e-09	4.94853	0.011	0	4.61494e-05
MIR155HG	1.98039e-62	4.94631	0.134	0.009	4.09861e-58
PDGFRA	4.80797e-08	4.93878	0.009	0	0.000995057
WNT5B	1.05397e-06	4.92354	0.008	0	0.0218129
MT1G	7.6937e-20	4.91784	0.038	0.002	1.59229e-15
ANKRD33B	2.2927e-62	4.91716	0.113	0.004	4.74497e-58
CD80	5.06104e-62	4.91416	0.132	0.008	1.04743e-57
MFGE8	2.92853e-178	4.91206	0.294	0.007	6.06089e-174
GXYLT2	4.80797e-08	4.89499	0.009	0	0.000995057
MEIS3	2.22987e-09	4.88174	0.011	0	4.61494e-05
TCF7L1	1.79003e-10	4.87788	0.015	0	3.70465e-06
ENOX1	2.22987e-09	4.87388	0.011	0	4.61494e-05
MRC1	4.27672e-49	4.8661	0.098	0.005	8.85111e-45
TNNT2	2.22987e-09	4.85645	0.011	0	4.61494e-05
AC027020.2	1.05397e-06	4.85465	0.008	0	0.0218129
BATF2	2.22987e-09	4.83164	0.011	0	4.61494e-05
OLAH	1.51073e-62	4.81981	0.094	0.001	3.1266e-58
NEURL3	8.96918e-12	4.81975	0.017	0	1.85626e-07
EDDM13	1.05397e-06	4.8193	0.008	0	0.0218129
TVP23A	1.99869e-41	4.81734	0.074	0.003	4.13648e-37
AL138899.1	1.05397e-06	4.81574	0.008	0	0.0218129
CYP7B1	2.22987e-09	4.81099	0.011	0	4.61494e-05
PIR	1.04577e-10	4.80298	0.013	0	2.16432e-06
LILRB5	1.05397e-06	4.80206	0.008	0	0.0218129
AC096677.1	4.80797e-08	4.79063	0.009	0	0.000995057
CD163	0	4.7632	0.817	0.123	0
FMN1	1.90859e-216	4.75186	0.349	0.007	3.95002e-212
NYNRIN	4.80797e-08	4.74351	0.009	0	0.000995057
AL359265.3	4.80797e-08	4.72657	0.009	0	0.000995057
VTN	4.80797e-08	4.69708	0.009	0	0.000995057
PSAT1	4.80797e-08	4.67981	0.009	0	0.000995057
RAB3C	1.05397e-06	4.67556	0.008	0	0.0218129
CXCL14	4.80797e-08	4.67152	0.009	0	0.000995057
ZNF608	7.35736e-08	4.6679	0.011	0	0.00152268
AC025423.4	1.05397e-06	4.66721	0.008	0	0.0218129
SRSF12	1.05397e-06	4.65789	0.008	0	0.0218129
AC239800.2	4.80797e-08	4.64833	0.009	0	0.000995057
CNKSR3	1.05397e-06	4.64698	0.008	0	0.0218129
DLL4	4.80797e-08	4.63852	0.009	0	0.000995057
AC234582.1	1.08093e-15	4.6314	0.023	0	2.23708e-11
CCDC81	1.05397e-06	4.62138	0.008	0	0.0218129
C1orf220	1.05397e-06	4.61231	0.008	0	0.0218129
FOXN3-AS2	1.05397e-06	4.60762	0.008	0	0.0218129
PYCR1	2.22987e-09	4.60678	0.011	0	4.61494e-05
ACOXL	1.05397e-06	4.56114	0.008	0	0.0218129
PLEK2	4.80797e-08	4.54634	0.009	0	0.000995057
AF064858.1	1.05397e-06	4.53869	0.008	0	0.0218129
CAMK1G	4.80797e-08	4.53326	0.009	0	0.000995057
SLC22A23	1.83274e-10	4.53102	0.015	0	3.79304e-06
FSCN1	2.58267e-62	4.53055	0.202	0.028	5.3451e-58
LBHD1	1.05397e-06	4.52913	0.008	0	0.0218129
MMP2	1.05397e-06	4.52871	0.008	0	0.0218129
CCDC136	4.80797e-08	4.52687	0.009	0	0.000995057
TEKT4	4.80797e-08	4.52568	0.009	0	0.000995057
CFAP58-DT	4.80797e-08	4.52246	0.009	0	0.000995057
TUBB3	4.80797e-08	4.51956	0.009	0	0.000995057
TREM2	4.80797e-08	4.51714	0.009	0	0.000995057
LRP11	4.80797e-08	4.50807	0.009	0	0.000995057
AL031316.1	7.59491e-41	4.50282	0.087	0.005	1.57184e-36
KCNG2	2.22987e-09	4.4961	0.011	0	4.61494e-05
GK3P	1.05397e-06	4.48918	0.008	0	0.0218129
KIAA1614	4.80797e-08	4.48285	0.009	0	0.000995057
SLC8A1-AS1	4.80797e-08	4.47598	0.009	0	0.000995057
KIAA1211	1.05397e-06	4.47538	0.008	0	0.0218129
HIST1H4J	5.44365e-31	4.43215	0.053	0.002	1.12662e-26
AL359541.1	1.05397e-06	4.42877	0.008	0	0.0218129
MS4A4A	5.42482e-273	4.42651	0.475	0.016	1.12272e-268
ABO	1.05397e-06	4.42054	0.008	0	0.0218129
EXOC3L4	1.05397e-06	4.4163	0.008	0	0.0218129
PSD3	3.56213e-18	4.39948	0.028	0.001	7.37219e-14
AP001257.1	1.05397e-06	4.39311	0.008	0	0.0218129
MTTP	1.05397e-06	4.38808	0.008	0	0.0218129
PRSS3	1.05397e-06	4.38585	0.008	0	0.0218129
RTEL1-TNFRSF6B	1.05397e-06	4.38493	0.008	0	0.0218129
MMRN1	1.74756e-10	4.37268	0.017	0.001	3.61675e-06
KCNN1	1.82121e-37	4.36886	0.06	0.001	3.76917e-33
AC098487.1	1.00079e-20	4.35676	0.034	0.001	2.07123e-16
FLT3	4.15465e-161	4.34716	0.3	0.012	8.59847e-157
AJ009632.2	1.05397e-06	4.33553	0.008	0	0.0218129
SLCO5A1	5.409e-40	4.32689	0.068	0.002	1.11945e-35
AL355312.4	1.46746e-06	4.32591	0.009	0	0.0303705
TSPAN15	2.21818e-26	4.32252	0.051	0.003	4.59074e-22
RNASE3	5.56629e-113	4.3149	0.189	0.004	1.152e-108
TNFAIP6	3.81539e-54	4.30877	0.091	0.002	7.89632e-50
RAB23	1.05397e-06	4.27875	0.008	0	0.0218129
ELF3-AS1	1.05397e-06	4.26964	0.008	0	0.0218129
FBXO27	7.17822e-11	4.26053	0.021	0.001	1.4856e-06
KHDRBS3	1.05397e-06	4.25367	0.008	0	0.0218129
CLU	0	4.23677	0.611	0.022	0
DHCR24	2.18247e-81	4.22005	0.136	0.003	4.51685e-77
AC008280.3	1.05397e-06	4.18176	0.008	0	0.0218129
ACVRL1	3.28405e-63	4.14507	0.111	0.003	6.79668e-59
ELANE	5.8383e-84	4.1319	0.143	0.004	1.2083e-79
IL2RA	1.25118e-15	4.10956	0.026	0.001	2.58945e-11
LOR	3.51534e-27	4.10371	0.043	0.001	7.27534e-23
EGOT	1.83892e-10	4.09096	0.015	0	3.80583e-06
DNAH11	1.23593e-10	4.07502	0.019	0.001	2.55788e-06
RBPMS2	1.46282e-06	4.05123	0.009	0	0.0302745
RNASE1	9.87848e-53	4.04829	0.106	0.005	2.04445e-48
AC108488.1	1.83274e-10	4.04152	0.015	0	3.79304e-06
TBC1D4	1.94752e-44	4.03699	0.13	0.016	4.03059e-40
NTN1	5.81749e-08	4.0368	0.013	0.001	0.00120399
IDH1	3.05159e-229	4.02545	0.413	0.016	6.31557e-225
SLC12A3	3.24571e-09	4.00614	0.015	0.001	6.71732e-05
ITGA7	5.05065e-13	3.99568	0.021	0.001	1.04528e-08
C1QA	1.5482e-58	3.99322	0.198	0.029	3.20416e-54
NRXN2	7.40535e-08	3.95895	0.011	0	0.00153261
SH3PXD2B	3.61709e-137	3.95278	0.249	0.009	7.48592e-133
SLAMF1	3.8236e-54	3.94313	0.108	0.005	7.91332e-50
ACHE	7.2412e-33	3.89161	0.064	0.003	1.49864e-28
OLFML2B	5.59017e-26	3.89045	0.047	0.002	1.15694e-21
TNFRSF9	7.20049e-45	3.88791	0.096	0.006	1.49021e-40
EBF4	2.01814e-28	3.82281	0.049	0.002	4.17674e-24
LINC01268	1.77441e-10	3.821	0.017	0.001	3.67232e-06
MPV17L	9.50581e-39	3.80009	0.07	0.003	1.96732e-34
ZFP41	9.09233e-12	3.7901	0.017	0	1.88175e-07
ENPP4	8.68257e-208	3.78944	0.391	0.017	1.79694e-203
SLC28A3	1.43954e-24	3.78439	0.04	0.001	2.97928e-20
ST8SIA1	5.32543e-15	3.77964	0.03	0.002	1.10215e-10
NUDCD1	2.79786e-20	3.77636	0.042	0.003	5.79044e-16
LAMC1	9.25267e-43	3.77104	0.079	0.003	1.91493e-38
ZNF718	9.09233e-12	3.76818	0.017	0	1.88175e-07
TNFAIP8L3	2.21487e-17	3.76814	0.034	0.002	4.58389e-13
UHRF1	4.60139e-12	3.76057	0.023	0.001	9.52305e-08
SLAMF8	7.10693e-73	3.75547	0.147	0.008	1.47085e-68
ALOX12	1.83892e-10	3.74922	0.015	0	3.80583e-06
HBB	3.77933e-193	3.74487	0.326	0.009	7.8217e-189
SLCO4A1	3.07426e-69	3.74243	0.134	0.006	6.36249e-65
NKG7	0	3.73164	0.845	0.117	0
B4GALT6	9.34719e-16	3.71723	0.028	0.001	1.9345e-11
S100B	9.1228e-78	3.70964	0.172	0.011	1.88805e-73
FKBP5	0	3.70542	0.845	0.097	0
CEACAM4	5.77853e-294	3.7004	0.568	0.029	1.19592e-289
PEAK3	4.48418e-13	3.68978	0.019	0	9.28047e-09
LCNL1	1.47211e-06	3.68653	0.009	0	0.0304668
SLC39A8	1.01989e-224	3.66338	0.472	0.03	2.11076e-220
PRR16	1.08471e-15	3.64795	0.023	0	2.24492e-11
SNX7	3.04664e-18	3.64621	0.032	0.001	6.30532e-14
ALDH1L2	2.6557e-14	3.64535	0.023	0.001	5.49623e-10
CD200	1.37265e-20	3.63575	0.043	0.003	2.84083e-16
RAB38	1.14835e-33	3.63322	0.06	0.002	2.37662e-29
AL355922.1	6.07788e-95	3.63194	0.189	0.009	1.25788e-90
HBA2	7.41081e-109	3.62726	0.192	0.006	1.53374e-104
UNC5B	1.83892e-10	3.6214	0.015	0	3.80583e-06
AC093799.1	1.47677e-06	3.61942	0.009	0	0.0305633
ANXA3	4.11156e-22	3.61241	0.04	0.002	8.50929e-18
MT1E	2.23373e-69	3.60359	0.164	0.013	4.62292e-65
SLC27A4	3.01947e-49	3.59789	0.092	0.004	6.2491e-45
HPD	1.47677e-06	3.59621	0.009	0	0.0305633
ITGA9	1.78526e-10	3.59012	0.017	0.001	3.69478e-06
AMOT	1.01839e-06	3.58559	0.011	0.001	0.0210765
FKTN	4.15312e-13	3.58472	0.023	0.001	8.59529e-09
SRGAP1	3.65823e-91	3.56362	0.174	0.007	7.57108e-87
MSTO1	9.17335e-29	3.55814	0.055	0.003	1.89852e-24
FUT10	9.48375e-16	3.55537	0.028	0.001	1.96276e-11
AC006033.2	1.47677e-06	3.55207	0.009	0	0.0305633
SH2D4A	1.47677e-06	3.54163	0.009	0	0.0305633
AL157895.1	1.47677e-06	3.5315	0.009	0	0.0305633
NANOS1	1.83892e-10	3.51924	0.015	0	3.80583e-06
AL512625.3	1.78526e-10	3.5143	0.017	0.001	3.69478e-06
PKD2L1	5.90967e-31	3.50889	0.051	0.001	1.22307e-26
LINC00944	3.70605e-09	3.50594	0.013	0	7.67003e-05
PPIL1	9.94987e-38	3.496	0.072	0.003	2.05923e-33
ANKRD35	5.06664e-13	3.47107	0.021	0.001	1.04859e-08
ZDHHC16	6.94734e-46	3.46408	0.091	0.004	1.43782e-41
OR11G2	7.42946e-08	3.4522	0.011	0	0.0015376
ZDHHC19	3.13058e-27	3.44757	0.049	0.002	6.47904e-23
HBA1	1.072e-78	3.44634	0.132	0.003	2.21861e-74
SULT1B1	1.38475e-141	3.44499	0.272	0.012	2.86588e-137
AC008440.2	1.93342e-22	3.44027	0.043	0.002	4.0014e-18
ZNF287	7.36005e-09	3.43945	0.019	0.002	0.000152324
C19orf84	7.42946e-08	3.39412	0.011	0	0.0015376
GBP7	9.09233e-12	3.3798	0.017	0	1.88175e-07
DGUOK-AS1	9.81551e-67	3.37305	0.132	0.006	2.03142e-62
EDARADD	1.79618e-10	3.36692	0.017	0.001	3.71738e-06
NRN1	1.98848e-19	3.36315	0.032	0.001	4.11536e-15
AC079209.1	1.27674e-12	3.35713	0.026	0.002	2.64234e-08
FAM20A	2.4191e-164	3.34964	0.334	0.018	5.00656e-160
MT2A	5.03653e-124	3.33409	0.749	0.247	1.04236e-119
ARHGAP22	1.93848e-43	3.32541	0.113	0.011	4.01187e-39
CLEC9A	2.44437e-08	3.31618	0.025	0.003	0.000505887
RBMS3	1.47677e-06	3.31592	0.009	0	0.0305633
AARS	1.72924e-47	3.31587	0.096	0.005	3.57884e-43
C6orf132	5.8851e-08	3.31243	0.013	0.001	0.00121798
CYB5A	1.64921e-136	3.30754	0.342	0.03	3.4132e-132
CELF2-AS1	1.47677e-06	3.30578	0.009	0	0.0305633
LRRC61	2.30769e-14	3.30163	0.025	0.001	4.77599e-10
GBP1	4.40085e-41	3.29116	0.219	0.053	9.108e-37
OLFML2A	3.29437e-09	3.28136	0.015	0.001	6.81803e-05
TWIST2	4.21491e-13	3.2731	0.023	0.001	8.72318e-09
AKAP2	6.79482e-19	3.26726	0.043	0.003	1.40626e-14
CPE	1.27138e-10	3.26273	0.019	0.001	2.63125e-06
SOCS2	9.16679e-27	3.25717	0.068	0.006	1.89716e-22
IL4I1	4.3747e-64	3.25059	0.192	0.023	9.05388e-60
C16orf45	1.63287e-13	3.2496	0.026	0.002	3.37939e-09
IFT140	5.29837e-07	3.2482	0.013	0.001	0.0109655
ZFYVE9	2.24263e-18	3.24174	0.034	0.002	4.64134e-14
SLC22A31	1.47677e-06	3.21463	0.009	0	0.0305633
SAP30	5.96794e-229	3.21333	0.596	0.062	1.23513e-224
GCSAM	7.55514e-09	3.20883	0.019	0.002	0.000156361
CIB2	7.13263e-25	3.20878	0.062	0.006	1.47617e-20
ZNF257	2.13062e-09	3.20554	0.017	0.001	4.40953e-05
PEX11G	9.62101e-12	3.18922	0.019	0.001	1.99116e-07
CD38	1.92524e-119	3.18795	0.268	0.018	3.98448e-115
LXN	2.73263e-27	3.18052	0.058	0.004	5.65545e-23
CADM1	6.10134e-08	3.1604	0.021	0.003	0.00126273
AL031594.1	1.79618e-10	3.14905	0.017	0.001	3.71738e-06
RAB13	1.51105e-268	3.13677	0.726	0.089	3.12728e-264
HESX1	7.45111e-11	3.13398	0.021	0.001	1.54208e-06
TRAF1	1.54002e-51	3.13271	0.143	0.015	3.18723e-47
RNASE2	1.16024e-225	3.1312	0.711	0.117	2.40123e-221
WDR92	2.94555e-15	3.13055	0.032	0.002	6.0961e-11
HSD17B4	2.72728e-184	3.12052	0.409	0.028	5.64437e-180
CLDN7	7.45111e-11	3.12011	0.021	0.001	1.54208e-06
APOC1	1.38182e-29	3.11537	0.081	0.009	2.85982e-25
CRYZ	2.9232e-15	3.09198	0.032	0.002	6.04985e-11
FBXO10	7.42946e-08	3.08427	0.011	0	0.0015376
RAMP1	5.49477e-11	3.08275	0.049	0.01	1.1372e-06
HLA-DOB	2.81724e-36	3.08206	0.121	0.017	5.83055e-32
EPHX3	1.02406e-06	3.07527	0.011	0.001	0.021194
SAMD14	5.90212e-08	3.06975	0.013	0.001	0.0012215
IL7	1.09543e-13	3.06957	0.032	0.003	2.26711e-09
NT5DC2	1.54514e-150	3.0645	0.377	0.034	3.19783e-146
C11orf98	1.94513e-16	3.06024	0.034	0.002	4.02565e-12
AC004148.2	3.62662e-23	3.05688	0.049	0.003	7.50564e-19
TMIGD3	5.43826e-31	3.05598	0.055	0.002	1.1255e-26
AL603839.3	1.01839e-06	3.04972	0.011	0.001	0.0210765
DNAH10	4.5763e-12	3.0487	0.023	0.001	9.47111e-08
VANGL1	3.80833e-16	3.04522	0.032	0.002	7.88173e-12
JSRP1	1.14807e-09	3.03967	0.019	0.001	2.37605e-05
COL8A2	1.24734e-44	3.03805	0.102	0.007	2.58149e-40
TMEM163	5.31188e-07	3.03451	0.013	0.001	0.0109935
TXN	7.87797e-150	3.02926	0.991	0.626	1.63043e-145
CFH	5.86812e-08	3.0231	0.013	0.001	0.00121447
MCOLN2	1.46189e-25	3.02268	0.087	0.013	3.02552e-21
AC092287.1	1.47677e-06	3.01606	0.009	0	0.0305633
FCRLB	5.90212e-08	3.01135	0.013	0.001	0.0012215
ITGB3	1.25138e-12	3.00671	0.026	0.002	2.58985e-08
ITGA2B	2.70346e-29	2.99726	0.07	0.006	5.59509e-25
AC016405.3	5.27145e-07	2.98846	0.013	0.001	0.0109098
KCNE5	4.61399e-12	2.98106	0.023	0.001	9.54912e-08
PPA1	1.4204e-129	2.97671	0.86	0.309	2.93965e-125
SAMD9L	6.44466e-61	2.96335	0.174	0.019	1.33379e-56
CAPN12	7.5372e-09	2.95556	0.019	0.002	0.00015599
SLC41A2	6.08599e-29	2.95394	0.075	0.007	1.25956e-24
NRP1	3.16892e-33	2.94731	0.068	0.004	6.55839e-29
CCR7	2.64632e-21	2.94629	0.138	0.04	5.47682e-17
AC073508.3	3.01585e-16	2.94588	0.038	0.003	6.24161e-12
ISG20	8.74874e-70	2.94	0.362	0.086	1.81064e-65
CLEC1B	9.73929e-17	2.93929	0.036	0.003	2.01564e-12
P2RY1	2.44002e-170	2.93793	0.404	0.032	5.04986e-166
CD40	3.77155e-64	2.93418	0.236	0.037	7.8056e-60
MERTK	8.52716e-86	2.93409	0.175	0.009	1.76478e-81
SIGLEC5	3.22877e-35	2.92889	0.068	0.003	6.68227e-31
EDNRB	3.10922e-33	2.92189	0.068	0.004	6.43484e-29
SYNPO	1.00498e-07	2.91509	0.017	0.002	0.00207991
TFPI	8.43687e-32	2.90415	0.079	0.007	1.7461e-27
PROS1	2.32608e-17	2.89961	0.034	0.002	4.81405e-13
ST20	1.56083e-151	2.89767	0.309	0.016	3.2303e-147
CCND1	4.17466e-11	2.89728	0.026	0.003	8.63987e-07
LINC00599	4.48341e-19	2.89602	0.04	0.003	9.27886e-15
IL32	3.19919e-52	2.87806	0.196	0.033	6.62104e-48
DOC2B	5.06664e-13	2.87292	0.021	0.001	1.04859e-08
NDN	5.66609e-23	2.87045	0.053	0.004	1.17265e-18
LINC01888	7.42336e-12	2.86821	0.021	0.001	1.53634e-07
ELOVL7	1.82888e-11	2.86644	0.025	0.002	3.78504e-07
PPP1R14A	6.79137e-28	2.86183	0.094	0.014	1.40554e-23
FZD5	3.81358e-28	2.8591	0.058	0.003	7.89259e-24
POP1	1.00957e-07	2.84898	0.017	0.002	0.00208941
SAC3D1	1.25026e-49	2.8484	0.117	0.009	2.58753e-45
TMEM14A	1.1323e-16	2.84511	0.053	0.007	2.3434e-12
MT-ND6	1.38761e-152	2.84439	0.374	0.031	2.8718e-148
AC097534.2	1.64031e-32	2.84114	0.07	0.004	3.39479e-28
CEBPE	3.79136e-17	2.83793	0.032	0.002	7.84661e-13
KIR3DX1	1.24376e-06	2.83054	0.015	0.002	0.0257409
MSLN	1.77176e-06	2.82976	0.017	0.002	0.0366683
SMIM10	4.0024e-21	2.82617	0.047	0.003	8.28337e-17
CX3CR1	2.77332e-61	2.8253	0.153	0.013	5.73966e-57
SERPINF1	2.2711e-59	2.82107	0.217	0.034	4.70027e-55
AL357054.4	5.35262e-07	2.81713	0.013	0.001	0.0110778
DYNLL1	1.25483e-223	2.81208	0.642	0.079	2.59699e-219
IL18R1	1.56889e-25	2.80559	0.092	0.015	3.24697e-21
CAVIN3	2.24136e-79	2.78247	0.202	0.018	4.63871e-75
ZNF28	6.94489e-26	2.77414	0.06	0.005	1.43731e-21
ZBTB16	5.14275e-39	2.76859	0.089	0.006	1.06434e-34
AC006064.4	7.84549e-52	2.76689	0.098	0.004	1.6237e-47
AL353708.1	4.4951e-19	2.76498	0.04	0.003	9.30306e-15
NEXN	3.82978e-30	2.75287	0.066	0.004	7.92612e-26
THRB	5.90212e-08	2.75	0.013	0.001	0.0012215
TANGO6	1.94127e-30	2.74973	0.068	0.005	4.01765e-26
RNF144B	1.19234e-263	2.74767	0.825	0.133	2.46766e-259
ZNF260	7.60563e-21	2.74186	0.045	0.003	1.57406e-16
PTGR2	1.30261e-12	2.73084	0.026	0.002	2.69588e-08
AC011444.1	1.02122e-06	2.72551	0.011	0.001	0.0211352
GPR180	5.49423e-23	2.72428	0.06	0.006	1.13708e-18
RASL11A	4.09907e-23	2.72125	0.064	0.007	8.48345e-19
TRIM35	4.67749e-12	2.71807	0.023	0.001	9.68053e-08
AIFM2	1.89698e-21	2.71331	0.049	0.004	3.92599e-17
AC093157.1	2.29458e-17	2.71179	0.04	0.003	4.74886e-13
KIFC3	2.78065e-88	2.71063	0.206	0.015	5.75482e-84
LDAH	1.37518e-15	2.71048	0.025	0.001	2.84606e-11
SELP	1.71138e-08	2.70312	0.017	0.001	0.000354188
ACTR3B	2.42465e-07	2.69909	0.015	0.001	0.00501806
FAM118B	3.61243e-12	2.69364	0.028	0.003	7.47629e-08
SUCNR1	3.88615e-11	2.68577	0.023	0.002	8.04278e-07
MCEMP1	1.72313e-187	2.68385	0.553	0.069	3.5662e-183
GAS6	1.51637e-87	2.6706	0.304	0.045	3.13827e-83
DEXI	4.68756e-52	2.67042	0.13	0.011	9.70137e-48
ALDH1B1	7.66366e-09	2.66482	0.019	0.002	0.000158607
PLAC8	4.25955e-166	2.66317	0.806	0.259	8.81557e-162
POLA2	1.61512e-15	2.65863	0.038	0.003	3.34264e-11
TMEM236	9.73452e-16	2.65208	0.028	0.001	2.01466e-11
BAG2	2.83209e-21	2.63781	0.072	0.01	5.8613e-17
PLEKHF1	1.71423e-07	2.62849	0.019	0.002	0.00354777
KCNK13	6.74731e-16	2.62734	0.04	0.004	1.39642e-11
MYLK	1.23839e-06	2.62631	0.015	0.002	0.0256296
COA3	6.74358e-155	2.62433	0.391	0.034	1.39565e-150
AC092069.1	6.31231e-27	2.62431	0.075	0.008	1.3064e-22
PCSK6	3.85666e-11	2.62258	0.023	0.002	7.98175e-07
ZNF816	2.49478e-10	2.62161	0.023	0.002	5.16319e-06
AL161457.2	7.73685e-09	2.61965	0.019	0.002	0.000160122
CNN3	6.73838e-07	2.61592	0.021	0.003	0.0139458
PRKAR1B	1.91139e-21	2.61522	0.053	0.005	3.95581e-17
CHPF	1.24916e-06	2.61455	0.015	0.002	0.0258526
AC145207.2	1.73879e-07	2.61142	0.019	0.002	0.0035986
SLAMF7	5.76669e-68	2.61018	0.211	0.026	1.19347e-63
HIST1H2AM	1.70287e-08	2.60463	0.017	0.001	0.000352425
MCC	4.68207e-07	2.60437	0.017	0.002	0.00969001
KCNJ2	4.83498e-19	2.60385	0.04	0.003	1.00065e-14
LMAN2L	1.68921e-14	2.6007	0.026	0.001	3.496e-10
AC008735.2	7.29395e-11	2.60004	0.021	0.001	1.50956e-06
GRB10	1.7923e-32	2.59856	0.07	0.004	3.70934e-28
ATP6V1C1	4.10857e-100	2.59849	0.258	0.023	8.5031e-96
IGHG4	5.6119e-10	2.59605	0.021	0.002	1.16144e-05
TBCE.1	2.51255e-10	2.59193	0.023	0.002	5.19998e-06
HLA-DQB2	1.67561e-08	2.58867	0.032	0.006	0.000346783
E2F2	4.63378e-82	2.58791	0.194	0.015	9.59007e-78
TREML1	1.01167e-15	2.58605	0.057	0.009	2.09376e-11
C22orf34	8.02703e-10	2.582	0.026	0.003	1.66127e-05
PAQR8	5.33901e-07	2.578	0.013	0.001	0.0110496
FAHD2B	1.95226e-06	2.57088	0.019	0.003	0.040404
OSR2	3.16679e-27	2.56386	0.058	0.004	6.55398e-23
RIDA	2.12657e-31	2.56083	0.081	0.008	4.40114e-27
PDGFD	2.41886e-07	2.55841	0.015	0.001	0.00500608
AC011603.2	5.92877e-13	2.55459	0.032	0.003	1.22702e-08
PODNL1	7.53092e-11	2.55419	0.021	0.001	1.5586e-06
GRAMD2B	2.88255e-22	2.55182	0.068	0.009	5.96573e-18
LINC01127	5.32543e-07	2.54612	0.013	0.001	0.0110215
MYL9	3.74533e-26	2.54532	0.072	0.008	7.75133e-22
AC007262.2	1.16001e-09	2.54319	0.019	0.001	2.40075e-05
MMP14	3.62973e-33	2.54256	0.068	0.004	7.5121e-29
LINC01569	1.01881e-07	2.53998	0.017	0.002	0.00210853
SLC7A8	5.36626e-07	2.53915	0.013	0.001	0.011106
LDLRAD3	1.35413e-83	2.53773	0.221	0.021	2.8025e-79
ZDHHC13	8.34583e-19	2.53062	0.038	0.002	1.72725e-14
S100P	8.24329e-121	2.52995	0.323	0.031	1.70603e-116
HIST2H2AA4	1.15658e-20	2.52776	0.049	0.004	2.39365e-16
CMKLR1	2.51255e-10	2.521	0.023	0.002	5.19998e-06
RETN	2.35846e-81	2.52081	0.749	0.503	4.88107e-77
TRIP10	1.81656e-48	2.51089	0.132	0.013	3.75955e-44
KCNJ2-AS1	1.31574e-12	2.50707	0.026	0.002	2.72305e-08
CST7	6.05725e-92	2.49485	0.353	0.061	1.25361e-87
TNFAIP8	2.51214e-75	2.49056	0.547	0.167	5.19913e-71
BTLA	1.32142e-09	2.48872	0.023	0.002	2.73482e-05
AC025171.4	5.35262e-07	2.48775	0.013	0.001	0.0110778
JPT2	1.045e-16	2.48629	0.036	0.003	2.16273e-12
RNASEL	2.78625e-16	2.47959	0.042	0.004	5.76642e-12
CEP19	2.40733e-07	2.47645	0.015	0.001	0.0049822
UGDH	5.42005e-35	2.46694	0.089	0.008	1.12173e-30
AP001043.1	2.56057e-10	2.46621	0.023	0.002	5.29935e-06
RUVBL1	8.89596e-48	2.46514	0.136	0.015	1.84111e-43
NAV1	2.94939e-49	2.4649	0.14	0.015	6.10406e-45
GBP4	4.04319e-21	2.46331	0.204	0.078	8.36779e-17
MANF	2.25726e-106	2.45924	0.347	0.047	4.67162e-102
LCN2	7.5193e-09	2.45754	0.019	0.002	0.000155619
AC061992.1	3.44885e-08	2.4521	0.015	0.001	0.000713775
CEP41	5.29368e-14	2.44261	0.04	0.005	1.09558e-09
LARS	1.09235e-128	2.44253	0.37	0.04	2.26072e-124
PRUNE2	5.33043e-21	2.44092	0.051	0.004	1.10319e-16
ALDH18A1	7.65557e-11	2.43919	0.028	0.003	1.5844e-06
SCLY	3.31988e-09	2.43887	0.021	0.002	6.87082e-05
B4GALT2	6.21739e-13	2.43357	0.028	0.002	1.28675e-08
GBP5	2.64976e-28	2.43197	0.17	0.045	5.48395e-24
ARNTL2	1.0731e-40	2.4294	0.115	0.012	2.22089e-36
GGH	1.64515e-57	2.4276	0.149	0.014	3.40481e-53
SAMD12	2.44794e-07	2.42551	0.015	0.001	0.00506625
LMNB2	6.25631e-51	2.4232	0.142	0.015	1.29481e-46
ZNF48	2.09387e-10	2.42217	0.026	0.003	4.33348e-06
SLC25A20	2.1031e-56	2.42142	0.138	0.011	4.35257e-52
LIMA1	2.91469e-15	2.4134	0.04	0.004	6.03224e-11
LINC00636	1.01881e-07	2.41186	0.017	0.002	0.00210853
RNF32	5.29837e-07	2.41027	0.013	0.001	0.0109655
CLEC6A	1.71994e-08	2.40991	0.017	0.001	0.00035596
CFLAR	8.70868e-57	2.40867	0.798	0.367	1.80235e-52
MUC1	5.63758e-51	2.40678	0.115	0.008	1.16675e-46
SLC1A3	1.60907e-66	2.40663	0.14	0.008	3.33013e-62
LAP3	7.42929e-167	2.39667	0.838	0.237	1.53757e-162
MAPK11	1.7088e-15	2.39519	0.038	0.003	3.53653e-11
ACBD4	1.25458e-06	2.39508	0.015	0.002	0.0259648
ARL4D	2.73494e-12	2.39142	0.032	0.003	5.66024e-08
ETV7	3.92216e-28	2.38929	0.064	0.005	8.1173e-24
IFI27L1	2.06714e-39	2.38729	0.115	0.013	4.27815e-35
AC021594.2	5.52959e-10	2.38576	0.021	0.002	1.1444e-05
MTRNR2L8	3.86208e-203	2.37893	0.715	0.12	7.99296e-199
CLIC2	7.80194e-51	2.3751	0.204	0.035	1.61469e-46
ARL13B	2.64492e-12	2.37487	0.032	0.003	5.47393e-08
SRR	1.84151e-18	2.36728	0.045	0.004	3.81119e-14
SLC16A7	1.34097e-118	2.36543	0.358	0.042	2.77527e-114
SPRY2	4.02734e-128	2.36474	0.366	0.04	8.33499e-124
FPR2	1.70119e-112	2.36324	0.291	0.026	3.52079e-108
GPD1L	2.23201e-24	2.36222	0.057	0.004	4.61936e-20
HOXA9	7.76172e-26	2.35897	0.064	0.006	1.60637e-21
NCDN	1.04586e-12	2.35694	0.034	0.004	2.16452e-08
ERI2	5.36626e-07	2.35607	0.013	0.001	0.011106
SOWAHD	1.13314e-16	2.349	0.043	0.004	2.34514e-12
TSPAN13	4.51858e-14	2.34679	0.055	0.01	9.35166e-10
NR6A1	2.10585e-14	2.33934	0.032	0.003	4.35827e-10
MFSD3	1.6164e-11	2.33862	0.036	0.005	3.3453e-07
DAB2	2.21147e-68	2.33623	0.202	0.023	4.57685e-64
DHX58	1.8406e-38	2.3279	0.108	0.011	3.8093e-34
STXBP4	4.70312e-12	2.32558	0.023	0.001	9.73358e-08
S100A8	1.02775e-110	2.32546	0.913	0.88	2.12703e-106
DARS2	1.46157e-12	2.32285	0.03	0.003	3.02486e-08
AC007038.1	3.46722e-08	2.32262	0.015	0.001	0.000717576
UMODL1	6.29519e-07	2.31896	0.019	0.003	0.0130285
IGFBP2	8.833e-31	2.31878	0.064	0.004	1.82808e-26
UQCC2	3.54689e-125	2.31813	0.368	0.042	7.34065e-121
AC022075.1	1.75654e-07	2.31755	0.019	0.002	0.00363534
PHOSPHO2	2.48888e-10	2.31732	0.023	0.002	5.15098e-06
ZNF749	3.46722e-08	2.31595	0.015	0.001	0.000717576
MMAB	1.28476e-78	2.31139	0.223	0.023	2.65894e-74
PALLD	7.36952e-64	2.30867	0.175	0.017	1.5252e-59
TRADD	1.14087e-99	2.30402	0.336	0.046	2.36114e-95
DUSP4	6.50371e-44	2.30393	0.211	0.045	1.34601e-39
SLC37A4	1.20811e-15	2.29768	0.042	0.004	2.50031e-11
GADD45A	1.15189e-87	2.29416	0.504	0.125	2.38396e-83
PSMC3IP	6.21147e-08	2.29023	0.021	0.003	0.00128553
TNFRSF11A	3.12997e-16	2.29007	0.049	0.006	6.47779e-12
AP1S1	1.27855e-128	2.29007	0.368	0.04	2.64609e-124
TMEM237	1.88794e-06	2.28722	0.021	0.003	0.0390728
PXDC1	5.65563e-12	2.28674	0.042	0.007	1.17049e-07
MYOF	7.3363e-108	2.28597	0.315	0.035	1.51832e-103
RAB10	2.39588e-202	2.28345	0.713	0.114	4.95851e-198
PGA5	1.33908e-09	2.28317	0.023	0.002	2.77137e-05
AC106707.1	2.45205e-17	2.27469	0.043	0.004	5.07476e-13
FKBP3	1.67604e-159	2.26945	0.54	0.079	3.46872e-155
RIPOR2	8.62898e-170	2.26768	0.638	0.113	1.78585e-165
FDPS	3.4565e-158	2.26585	0.623	0.112	7.15357e-154
ADAM19	2.39389e-66	2.26502	0.202	0.024	4.9544e-62
H2AFY2	3.75649e-13	2.26465	0.036	0.004	7.77443e-09
ACOX2	3.94802e-22	2.25976	0.053	0.004	8.17081e-18
SKP2	1.20787e-15	2.25878	0.051	0.007	2.4998e-11
PLPP7	4.74115e-07	2.25856	0.017	0.002	0.00981228
PF4	3.04514e-17	2.25825	0.096	0.024	6.30223e-13
PIGF	7.54155e-78	2.25284	0.204	0.019	1.5608e-73
PTPRK	1.85113e-06	2.24299	0.021	0.003	0.038311
GSTM2	1.2573e-06	2.24279	0.015	0.002	0.0260211
APOL2	7.83568e-42	2.23457	0.138	0.018	1.62167e-37
FADS2	7.03704e-58	2.23139	0.145	0.012	1.45639e-53
WDR12	2.46209e-46	2.22817	0.117	0.01	5.09554e-42
TBC1D31	3.48224e-12	2.21934	0.028	0.003	7.20684e-08
TRPV2	2.54489e-103	2.21906	0.302	0.033	5.26691e-99
MVK	4.25561e-23	2.21795	0.064	0.007	8.80741e-19
BATF	2.84867e-85	2.21761	0.251	0.028	5.8956e-81
AL359258.2	3.67088e-12	2.21506	0.028	0.003	7.59726e-08
SEMA4B	7.76012e-29	2.21431	0.075	0.007	1.60603e-24
HOXA10	3.32441e-30	2.21295	0.085	0.009	6.8802e-26
CLDN15	6.48884e-08	2.20857	0.021	0.003	0.00134293
PIN4	4.8281e-127	2.20711	0.379	0.043	9.99224e-123
MRPL38	6.41202e-08	2.20682	0.021	0.003	0.00132703
CCDC61	2.0109e-14	2.20629	0.036	0.003	4.16176e-10
ZFP64	2.00647e-14	2.20541	0.036	0.003	4.15259e-10
AC024940.1	2.23895e-07	2.20505	0.021	0.003	0.00463373
CEP89	1.38029e-27	2.20414	0.07	0.006	2.85664e-23
AL355073.2	6.27795e-13	2.20042	0.028	0.002	1.29929e-08
HMBS	5.9708e-41	2.19927	0.125	0.015	1.23572e-36
AL035413.1	1.06448e-17	2.19759	0.042	0.003	2.20305e-13
RBP4	2.44209e-07	2.19578	0.015	0.001	0.00505416
ACOT2	9.02219e-25	2.19348	0.072	0.008	1.86723e-20
PFDN6	1.26422e-128	2.19326	0.425	0.057	2.61643e-124
MARCO	4.01751e-101	2.19324	0.609	0.181	8.31463e-97
SLC35C1	3.7918e-35	2.1911	0.096	0.01	7.84751e-31
VNN1	2.2565e-55	2.18816	0.126	0.009	4.67006e-51
AC007114.1	2.23064e-07	2.18626	0.021	0.003	0.00461654
NDUFA8	1.84817e-81	2.18397	0.258	0.032	3.82498e-77
AC008771.1	6.01604e-09	2.18389	0.023	0.003	0.000124508
CRLF2	5.6535e-10	2.17876	0.021	0.002	1.17005e-05
BCAT1	2.2592e-117	2.17613	0.381	0.05	4.67565e-113
ST14	2.62989e-131	2.17586	0.411	0.051	5.44282e-127
CCDC167	2.63761e-129	2.17562	0.353	0.035	5.45879e-125
PUDP	5.4314e-45	2.1691	0.121	0.012	1.12408e-40
MIR210HG	3.3123e-09	2.16697	0.021	0.002	6.85514e-05
RASGEF1A	8.48511e-20	2.1652	0.064	0.009	1.75608e-15
AC010654.1	3.44316e-19	2.15927	0.049	0.005	7.12595e-15
PDE5A	4.78093e-07	2.15919	0.017	0.002	0.00989461
FSD1L	2.53025e-27	2.15889	0.072	0.007	5.23661e-23
GFI1	2.19676e-08	2.1581	0.03	0.005	0.000454642
APOL1	1.27508e-52	2.15678	0.142	0.014	2.6389e-48
CTLA4	2.95898e-10	2.1543	0.028	0.003	6.1239e-06
GYS1	2.75578e-37	2.15427	0.106	0.011	5.70336e-33
ABTB2	1.96481e-13	2.15258	0.04	0.005	4.06637e-09
FAM173B	5.07735e-14	2.1487	0.034	0.003	1.05081e-09
CMAS	3.2733e-100	2.14795	0.304	0.035	6.77442e-96
SLC6A12	1.76369e-07	2.14412	0.019	0.002	0.00365013
MRPS14	1.74414e-82	2.13623	0.228	0.023	3.60967e-78
RHOBTB3	2.1721e-70	2.13526	0.225	0.028	4.49539e-66
WRB	3.53821e-39	2.13408	0.125	0.016	7.32269e-35
NIPA1	3.25297e-09	2.13289	0.03	0.005	6.73234e-05
DNAJC13	1.8677e-94	2.13285	0.274	0.03	3.86539e-90
AC007114.2	3.91216e-13	2.13257	0.036	0.004	8.0966e-09
MCM3AP-AS1	1.02406e-06	2.13067	0.011	0.001	0.021194
FBXL19	3.18812e-23	2.13017	0.055	0.004	6.59813e-19
PPBP	5.49731e-35	2.12795	0.172	0.037	1.13772e-30
AL354733.3	5.19148e-31	2.12769	0.083	0.008	1.07443e-26
CALML4	5.95399e-09	2.126	0.023	0.003	0.000123224
ELOA-AS1	4.75106e-07	2.12405	0.017	0.002	0.0098328
BHLHE41	2.37242e-07	2.12328	0.023	0.003	0.00490997
ICMT	1.38467e-41	2.12201	0.117	0.012	2.86572e-37
NDUFB3	9.22089e-181	2.12187	0.777	0.174	1.90836e-176
CEP57L1	2.07632e-10	2.12059	0.026	0.003	4.29715e-06
KCNE1	2.03759e-44	2.12036	0.115	0.01	4.217e-40
MKKS	5.7523e-46	2.11659	0.119	0.011	1.1905e-41
TIFA	4.33635e-49	2.114	0.157	0.02	8.97451e-45
EXD2	8.17646e-09	2.11327	0.025	0.003	0.00016922
CTPS2	2.24076e-08	2.11194	0.023	0.003	0.000463748
TIMMDC1	1.68347e-90	2.11123	0.285	0.035	3.48412e-86
MEN1	9.89152e-19	2.11102	0.053	0.006	2.04715e-14
DCAF7	9.30663e-90	2.10568	0.291	0.037	1.9261e-85
FLVCR2	3.16786e-129	2.10233	0.368	0.039	6.55621e-125
KCNK5	1.00498e-07	2.10191	0.017	0.002	0.00207991
USP18	1.59548e-08	2.10142	0.021	0.002	0.000330201
STOM	6.73805e-170	2.09878	0.638	0.105	1.39451e-165
ABCC4	2.42533e-24	2.09742	0.081	0.011	5.01947e-20
TBC1D16	1.32909e-31	2.0971	0.07	0.005	2.75069e-27
MTAP	2.99584e-24	2.0947	0.081	0.011	6.20018e-20
ANG	3.97129e-40	2.09144	0.1	0.009	8.21898e-36
ANXA6	8.24666e-161	2.0837	0.668	0.132	1.70673e-156
RIPOR3	1.03282e-07	2.08289	0.017	0.002	0.00213753
MEGF9	8.23183e-145	2.07941	0.547	0.091	1.70366e-140
CCDC127	8.15935e-24	2.07852	0.079	0.011	1.68866e-19
MT1X	8.58793e-91	2.07851	0.472	0.106	1.77736e-86
CHI3L2	4.13057e-30	2.07838	0.085	0.009	8.54863e-26
LINC00482	1.33115e-27	2.07695	0.07	0.006	2.75494e-23
HPF1	6.27245e-61	2.07567	0.185	0.022	1.29815e-56
SMCO4	4.42217e-151	2.0741	0.496	0.066	9.15211e-147
PCF11-AS1	2.56663e-10	2.07302	0.023	0.002	5.3119e-06
PLTP	1.91915e-06	2.07241	0.021	0.003	0.0397187
SLC12A5	2.44794e-07	2.07204	0.015	0.001	0.00506625
CBR1	6.16801e-98	2.07151	0.311	0.039	1.27653e-93
PDSS1	6.65508e-29	2.06922	0.085	0.01	1.37734e-24
AC005520.2	6.40308e-07	2.06523	0.019	0.003	0.0132518
USP5	6.64746e-60	2.06476	0.194	0.025	1.37576e-55
NT5DC3	4.69466e-11	2.06459	0.034	0.005	9.71606e-07
PRDX3	1.90394e-171	2.06205	0.681	0.126	3.9404e-167
AC242426.2	1.32879e-10	2.05795	0.032	0.004	2.75006e-06
LINC02062	2.08563e-14	2.05418	0.032	0.003	4.31643e-10
CEACAM3	2.45638e-20	2.05312	0.062	0.008	5.08373e-16
ABCF2.1	1.58091e-36	2.05164	0.113	0.014	3.27184e-32
APBA3	4.74707e-18	2.04912	0.055	0.007	9.82453e-14
SPATS2L	1.08856e-52	2.04593	0.247	0.05	2.25288e-48
MRPS28	1.16476e-46	2.04555	0.134	0.015	2.41059e-42
PIGU	2.63697e-15	2.0435	0.045	0.006	5.45748e-11
AMOTL1	5.24376e-12	2.04268	0.036	0.005	1.08525e-07
THTPA	1.23709e-45	2.0408	0.117	0.01	2.56029e-41
RASSF4	1.87912e-98	2.03848	0.447	0.09	3.88903e-94
PAM16	3.06762e-15	2.03526	0.032	0.002	6.34874e-11
CHCHD4	4.30576e-17	2.03495	0.045	0.005	8.91119e-13
GIPC1	2.71292e-44	2.03473	0.153	0.022	5.61466e-40
SLC35B3	1.17878e-20	2.03402	0.053	0.005	2.43961e-16
IPO13	1.19378e-09	2.0333	0.03	0.004	2.47066e-05
SMIM30	2.39138e-81	2.03297	0.274	0.037	4.94919e-77
LILRB1	2.8129e-118	2.03198	0.619	0.149	5.82158e-114
CHCHD7	7.04362e-162	2.03047	0.577	0.087	1.45775e-157
POLD1	5.7666e-23	2.02918	0.075	0.01	1.19346e-18
TEX2	1.01763e-30	2.02713	0.085	0.009	2.10609e-26
CCR6	3.96938e-10	2.02462	0.034	0.005	8.21502e-06
AC147651.4	3.41988e-59	2.02283	0.166	0.017	7.07778e-55
BEND7	2.26405e-07	2.01932	0.021	0.003	0.00468567
MRS2	1.15192e-51	2.0183	0.155	0.018	2.38401e-47
CD70	2.00133e-12	2.01722	0.042	0.006	4.14196e-08
FAM89A	2.3788e-59	2.01483	0.17	0.018	4.92317e-55
EXOSC5	1.83975e-42	2.01466	0.143	0.02	3.80754e-38
AC011899.2	1.87448e-30	2.01118	0.087	0.01	3.87942e-26
RNF20	1.65714e-50	2.01026	0.168	0.023	3.42961e-46
DPAGT1	1.09011e-50	2.00873	0.142	0.015	2.25609e-46
CNIH3	1.00269e-07	2.00596	0.017	0.002	0.00207518
LGALSL	1.40123e-10	2.00516	0.034	0.005	2.89998e-06
SIRPD	1.05524e-16	2.00363	0.049	0.006	2.18392e-12
SIGLEC10	3.70326e-147	2.0036	0.619	0.118	7.66427e-143
AC007620.2	1.61596e-08	2.00353	0.021	0.002	0.000334439
FDX2	7.929e-11	2.00311	0.028	0.003	1.64099e-06
CASP5	1.17729e-27	2.00304	0.074	0.007	2.43652e-23
SAMHD1	7.40423e-147	1.99519	0.855	0.339	1.53238e-142
PAG1	1.13313e-128	1.99503	0.581	0.12	2.34512e-124
STOML1	1.09162e-09	1.99436	0.028	0.004	2.25922e-05
ERMP1	2.51006e-13	1.99425	0.034	0.003	5.19482e-09
HILPDA	2.83296e-08	1.99395	0.026	0.004	0.000586309
SPIB	5.07029e-15	1.98851	0.087	0.022	1.04935e-10
TRMT10A	1.0303e-20	1.98561	0.066	0.009	2.13232e-16
LINC01871	1.29416e-06	1.984	0.025	0.005	0.0267839
HIST3H2A	1.12905e-78	1.98291	0.406	0.09	2.33669e-74
PTGR1	1.85127e-11	1.98243	0.028	0.003	3.83139e-07
TUBA1C	6.78495e-76	1.98091	0.694	0.246	1.40421e-71
PUS7	7.74931e-08	1.98058	0.023	0.003	0.0016038
SMIM37	1.88712e-90	1.98047	0.298	0.039	3.90558e-86
ARV1	1.57054e-17	1.97901	0.055	0.007	3.2504e-13
SOCS1	1.40643e-44	1.97861	0.215	0.045	2.91075e-40
RHPN1	1.02032e-11	1.97843	0.032	0.004	2.11165e-07
NAGS	6.52758e-08	1.97658	0.021	0.003	0.00135095
SMIM14	1.1417e-85	1.97498	0.308	0.045	2.36287e-81
TRIM5	1.04719e-28	1.97136	0.087	0.01	2.16726e-24
CASP6	1.02824e-14	1.9699	0.047	0.007	2.12804e-10
S100A9	5.037e-110	1.96843	0.934	0.952	1.04246e-105
ACAT2	7.31075e-69	1.96567	0.279	0.048	1.51303e-64
PARD6G-AS1	1.36601e-09	1.96508	0.023	0.002	2.82709e-05
CDK2AP2	8.55531e-110	1.9645	0.438	0.075	1.77061e-105
ACP2	4.26485e-32	1.96431	0.106	0.014	8.82653e-28
ETS2	1.32136e-141	1.96222	0.819	0.261	2.73468e-137
TPST1	1.35349e-93	1.96138	0.23	0.019	2.80118e-89
MYCBP	2.07629e-80	1.96012	0.258	0.033	4.29709e-76
CD72	1.10836e-13	1.95994	0.057	0.011	2.29387e-09
C1orf54	6.72309e-43	1.95738	0.242	0.057	1.39141e-38
SEMA4C	3.74515e-24	1.95678	0.072	0.009	7.75095e-20
AC009948.1	2.57972e-13	1.95442	0.043	0.006	5.33899e-09
THBS1	1.41064e-82	1.95407	0.691	0.26	2.91946e-78
GPATCH11	3.2568e-44	1.95123	0.157	0.023	6.74026e-40
GLT8D1	1.24152e-46	1.95069	0.14	0.016	2.56946e-42
IL27	1.93195e-20	1.9506	0.06	0.007	3.99836e-16
PKP2	1.30426e-14	1.94907	0.04	0.004	2.69929e-10
LINC01943	1.41038e-52	1.94731	0.183	0.026	2.91893e-48
FAM198B-AS1	2.1027e-10	1.94705	0.026	0.003	4.35175e-06
PTRH1	8.67124e-46	1.94514	0.128	0.013	1.7946e-41
EPOP	2.581e-07	1.94229	0.03	0.006	0.00534164
SEMA3C	1.60742e-24	1.94134	0.068	0.007	3.32671e-20
CD1A	1.81667e-06	1.94047	0.017	0.002	0.0375977
ORMDL2	6.15629e-124	1.93973	0.419	0.057	1.27411e-119
C2orf74	4.6149e-28	1.93902	0.081	0.009	9.551e-24
SMUG1	3.50561e-33	1.93755	0.104	0.013	7.25521e-29
FAIM	2.59594e-29	1.93666	0.098	0.014	5.37255e-25
IARS	1.19022e-40	1.93353	0.143	0.021	2.46328e-36
SPARC	1.30019e-38	1.93329	0.132	0.019	2.69086e-34
ACOT13	3.70178e-50	1.93179	0.145	0.016	7.6612e-46
TNIP2	5.15159e-116	1.92692	0.549	0.116	1.06617e-111
FLT1	1.42953e-22	1.91838	0.089	0.015	2.95857e-18
MED20	2.43034e-17	1.91768	0.043	0.004	5.02982e-13
TXNDC5	1.82718e-06	1.91702	0.017	0.002	0.0378154
MRPL51	2.3894e-166	1.91258	0.751	0.162	4.94509e-162
SCYL3	1.35218e-28	1.91095	0.091	0.012	2.79848e-24
RAB30-AS1	1.01388e-66	1.91042	0.198	0.022	2.09832e-62
TMOD1	1.15701e-09	1.9089	0.019	0.001	2.39455e-05
NLN	6.2045e-52	1.90621	0.166	0.021	1.28408e-47
PTMS	1.76164e-92	1.90471	0.462	0.103	3.64589e-88
CHKB-DT	4.70312e-12	1.90371	0.023	0.001	9.73358e-08
IKBKE	1.12098e-119	1.90344	0.358	0.041	2.31998e-115
TUSC1	1.22062e-14	1.90229	0.051	0.008	2.52621e-10
NUDT9	4.48303e-36	1.90161	0.123	0.017	9.27808e-32
C4orf46	5.44941e-36	1.90098	0.134	0.021	1.12781e-31
SNCA	1.79396e-78	1.90069	0.249	0.031	3.71277e-74
C1GALT1C1	1.99597e-42	1.89666	0.145	0.02	4.13087e-38
EHD3	3.358e-09	1.89408	0.021	0.002	6.94972e-05
WDR18	5.78387e-63	1.89378	0.223	0.032	1.19703e-58
RWDD3	4.84978e-32	1.8932	0.085	0.008	1.00371e-27
NOMO1	6.69271e-41	1.89107	0.123	0.014	1.38512e-36
RAB39A	2.14899e-18	1.89003	0.058	0.008	4.44755e-14
PICK1	1.46728e-48	1.88583	0.143	0.016	3.03669e-44
USP53	2.98186e-21	1.88345	0.096	0.019	6.17126e-17
RFXAP	2.9372e-15	1.883	0.045	0.006	6.07882e-11
DDX60	2.44598e-19	1.88201	0.06	0.008	5.06221e-15
ARHGEF19	8.39889e-09	1.88133	0.025	0.003	0.000173823
EDC3	1.14004e-10	1.88094	0.03	0.004	2.35942e-06
LMBRD2	4.82582e-16	1.8794	0.043	0.005	9.98753e-12
BRD3OS	4.18886e-10	1.87709	0.034	0.005	8.66927e-06
ZNF525	7.43713e-13	1.87661	0.042	0.006	1.53919e-08
BMP2	7.13479e-18	1.87507	0.06	0.009	1.47662e-13
SDHAF3	3.47517e-45	1.87431	0.153	0.021	7.19222e-41
SCN1B	9.88554e-22	1.87393	0.066	0.008	2.04591e-17
PLGRKT	4.44077e-101	1.87384	0.391	0.063	9.19061e-97
SCRN3	2.15248e-12	1.87227	0.04	0.006	4.45477e-08
FBXW9	1.51252e-08	1.87082	0.034	0.007	0.000313031
MSMO1	6.19222e-48	1.86722	0.162	0.022	1.28154e-43
VAC14	5.93569e-40	1.86646	0.145	0.022	1.22845e-35
CHM	2.54676e-19	1.86514	0.06	0.008	5.27078e-15
HAND2-AS1	1.60911e-08	1.86145	0.021	0.002	0.000333021
MGAM	3.99881e-11	1.86122	0.032	0.004	8.27593e-07
ZNF341	3.04711e-11	1.86089	0.03	0.003	6.3063e-07
BIVM	8.34164e-08	1.85741	0.025	0.004	0.00172639
NFE2L3	3.3098e-28	1.85718	0.079	0.009	6.84997e-24
S100A12	2.95218e-59	1.85695	0.842	0.717	6.10984e-55
SPTY2D1OS	8.41614e-12	1.85549	0.026	0.002	1.7418e-07
SLC16A3	1.30022e-108	1.85539	0.477	0.091	2.69093e-104
GBA	2.14832e-81	1.85414	0.234	0.025	4.44617e-77
CRELD1	1.61087e-19	1.85388	0.047	0.004	3.33385e-15
ARMC6	1.5155e-30	1.85352	0.102	0.014	3.13647e-26
ACSL5	4.61229e-66	1.85335	0.232	0.033	9.5456e-62
NME1	1.63598e-112	1.85266	0.5	0.096	3.38582e-108
DHRS4-AS1	1.35234e-19	1.852	0.051	0.005	2.7988e-15
SDF2L1	1.50359e-108	1.84961	0.619	0.163	3.11182e-104
TFCP2L1	2.14832e-14	1.84945	0.036	0.003	4.44616e-10
SLC39A1	6.23505e-81	1.84761	0.285	0.041	1.29041e-76
ADGRG3	3.95786e-18	1.84756	0.047	0.005	8.19119e-14
PVR	1.1848e-41	1.84624	0.121	0.013	2.45206e-37
ALG1	2.26859e-28	1.84358	0.094	0.013	4.69507e-24
BRCA1	4.79822e-11	1.84271	0.034	0.005	9.9304e-07
SKAP2	9.47653e-129	1.8409	0.625	0.139	1.96126e-124
AC018362.1	2.34346e-08	1.83869	0.023	0.003	0.000485003
LINC00968	7.98005e-08	1.83799	0.023	0.003	0.00165155
RIC8B	1.35099e-09	1.8363	0.023	0.002	2.796e-05
TMEM250	2.01011e-32	1.83417	0.098	0.012	4.16013e-28
C3orf14	1.92e-37	1.82973	0.145	0.024	3.97363e-33
RPE	2.75041e-54	1.82621	0.158	0.017	5.69224e-50
AHSA1	1.43667e-65	1.8251	0.251	0.04	2.97333e-61
VKORC1L1	1.26697e-21	1.82446	0.06	0.007	2.62212e-17
CCND3	1.41738e-145	1.82342	0.806	0.234	2.9334e-141
CLTCL1	2.44794e-07	1.82071	0.015	0.001	0.00506625
CRELD2	8.44885e-82	1.82051	0.374	0.073	1.74857e-77
ADAMDEC1	1.33685e-06	1.81731	0.025	0.005	0.0276676
WDR4	1.11083e-14	1.81612	0.053	0.009	2.29898e-10
SCAI	3.49283e-09	1.81587	0.03	0.005	7.22875e-05
PAGR1	2.28093e-07	1.81574	0.021	0.003	0.00472061
ISOC2	4.96102e-72	1.81571	0.274	0.043	1.02673e-67
TAP1	1.05082e-68	1.815	0.374	0.087	2.17477e-64
RGL1	1.06254e-75	1.81357	0.257	0.035	2.19904e-71
ZNF626	1.61333e-07	1.81307	0.028	0.005	0.00333895
HSD3B7	1.03532e-29	1.81289	0.089	0.01	2.14269e-25
SGMS2	1.21027e-74	1.80943	0.27	0.04	2.50478e-70
FBXO6	3.3426e-78	1.80918	0.33	0.059	6.91785e-74
IFI35	1.20955e-101	1.80872	0.447	0.083	2.50328e-97
MSR1	6.55911e-23	1.80655	0.098	0.018	1.35747e-18
HAUS7	2.06972e-20	1.80409	0.06	0.007	4.28349e-16
TIMM8B	8.49465e-162	1.80302	0.772	0.174	1.75805e-157
AC016065.1	1.86436e-12	1.80117	0.038	0.005	3.85847e-08
GCDH	6.82325e-37	1.79994	0.125	0.017	1.41214e-32
ANGEL1	1.77868e-11	1.7991	0.036	0.005	3.68115e-07
PHB	7.46081e-129	1.79825	0.553	0.102	1.54409e-124
GP9	3.96034e-12	1.7982	0.034	0.004	8.19633e-08
FAS	1.51299e-61	1.79582	0.245	0.041	3.13127e-57
AC011445.2	1.28278e-26	1.79519	0.077	0.009	2.65484e-22
AGAP2	9.75837e-09	1.79367	0.028	0.004	0.000201959
ALOX5AP	1.30096e-111	1.79353	0.66	0.197	2.69247e-107
EEF1AKMT1	5.67591e-20	1.79256	0.053	0.005	1.17469e-15
MYL6B	3.30799e-66	1.79208	0.264	0.044	6.84621e-62
TPRG1-AS1	1.83776e-06	1.7913	0.017	0.002	0.0380343
ZNF624	7.3159e-16	1.7908	0.045	0.005	1.5141e-11
PTCD2	7.08782e-07	1.79045	0.021	0.003	0.014669
NUDT16	2.20951e-130	1.78949	0.553	0.099	4.57279e-126
CLPB	5.04262e-58	1.78915	0.198	0.027	1.04362e-53
RPS26	4.83308e-250	1.78701	1	0.872	1.00026e-245
SNX11	7.3686e-58	1.78657	0.242	0.042	1.52501e-53
LINC02207	7.62769e-16	1.78557	0.045	0.005	1.57863e-11
TPD52	1.44582e-22	1.78543	0.087	0.015	2.99226e-18
AC002467.1	1.969e-07	1.78531	0.026	0.005	0.00407504
C1orf131	3.48415e-60	1.78464	0.24	0.04	7.2108e-56
MTMR4	3.44853e-35	1.78257	0.134	0.022	7.13708e-31
PPP1R21	1.20447e-33	1.78078	0.117	0.017	2.49277e-29
EPRS	8.75604e-96	1.7768	0.411	0.074	1.81215e-91
IFT122	2.76175e-15	1.77587	0.045	0.006	5.71571e-11
HSPB1	1.2317e-72	1.77431	0.449	0.117	2.54913e-68
SLC16A4	1.08755e-09	1.77326	0.028	0.004	2.2508e-05
ALKBH8	2.1491e-06	1.77182	0.026	0.006	0.0444778
PNPLA4	9.07819e-31	1.76573	0.098	0.013	1.87882e-26
AL645568.1	4.43355e-11	1.76553	0.026	0.003	9.17566e-07
FCGR2B	1.49325e-12	1.7652	0.094	0.03	3.09043e-08
SLC43A1	2.33069e-08	1.76481	0.03	0.005	0.000482361
EDEM3	2.37434e-74	1.76382	0.223	0.025	4.91393e-70
ASAP2	7.92175e-08	1.76225	0.023	0.003	0.00163949
TUBG1	4.67927e-17	1.76209	0.053	0.007	9.68421e-13
RAB27B	3.14886e-09	1.75871	0.032	0.005	6.51688e-05
NAIP	4.1419e-139	1.75596	0.625	0.126	8.57208e-135
HYOU1	1.19326e-66	1.75335	0.262	0.043	2.46957e-62
LTB4R2	1.20226e-09	1.75132	0.03	0.004	2.48819e-05
PGM2	9.37816e-73	1.74963	0.26	0.038	1.9409e-68
MCM3	9.14497e-14	1.74807	0.049	0.008	1.89264e-09
GPN3	5.68332e-53	1.74701	0.202	0.032	1.17622e-48
SLPI	8.59421e-09	1.74664	0.025	0.003	0.000177866
GSN	2.15254e-67	1.74495	0.625	0.219	4.45489e-63
C12orf73	6.81757e-13	1.74325	0.04	0.005	1.41096e-08
BRF2	8.9549e-19	1.74184	0.072	0.012	1.85331e-14
TCN2	6.04413e-86	1.73793	0.328	0.052	1.25089e-81
MAP3K6	4.75901e-20	1.73627	0.074	0.012	9.84924e-16
PC	2.72392e-08	1.7346	0.028	0.005	0.000563743
SHTN1	2.46185e-123	1.73106	0.609	0.135	5.09504e-119
SCFD2	1.45554e-11	1.7288	0.034	0.004	3.01238e-07
C11orf49	4.02576e-17	1.72699	0.051	0.006	8.33171e-13
MAGEF1	4.6397e-17	1.72669	0.064	0.011	9.60233e-13
NPDC1	5.40934e-09	1.72566	0.036	0.007	0.000111952
ZMYND8	9.68349e-33	1.72549	0.111	0.016	2.0041e-28
CBX1	5.96869e-54	1.72441	0.198	0.03	1.23528e-49
DLC1	6.7425e-13	1.72367	0.04	0.005	1.39543e-08
IFITM3	1.31737e-97	1.72089	0.913	0.507	2.72642e-93
TMEM53	1.45111e-19	1.71856	0.072	0.011	3.00321e-15
ARL2	2.37151e-63	1.71749	0.274	0.05	4.90807e-59
AC011374.2	6.54054e-08	1.71704	0.021	0.003	0.00135363
PYCR2	3.57762e-33	1.71596	0.113	0.016	7.40424e-29
NUB1	1.54166e-52	1.71582	0.47	0.159	3.19063e-48
TCEAL9	1.00275e-08	1.7146	0.028	0.004	0.000207529
TRAF2	7.79857e-13	1.71392	0.043	0.007	1.61399e-08
AL133453.1	7.43019e-44	1.71357	0.175	0.029	1.53775e-39
SNX21	3.4575e-25	1.71295	0.081	0.011	7.15564e-21
SYT11	4.87165e-59	1.71255	0.204	0.028	1.00824e-54
RSAD2	4.2651e-11	1.71121	0.053	0.012	8.82704e-07
DHRS13	5.18461e-12	1.71054	0.045	0.008	1.07301e-07
ADCY4	1.22084e-09	1.70907	0.032	0.005	2.52666e-05
ALG14	3.71459e-20	1.70785	0.087	0.016	7.68772e-16
MYO7B	6.00722e-13	1.70782	0.032	0.003	1.24326e-08
SF3B3	1.08605e-66	1.70729	0.251	0.038	2.2477e-62
VPS37D	3.471e-09	1.70429	0.028	0.004	7.18358e-05
PAOX	6.93169e-10	1.70423	0.04	0.008	1.43458e-05
HIBCH	5.675e-23	1.70331	0.072	0.009	1.1745e-18
TCAF2	7.10041e-13	1.70236	0.047	0.008	1.4695e-08
AL031595.2	6.48823e-07	1.70228	0.019	0.003	0.013428
CD59	2.18989e-48	1.69995	0.213	0.04	4.5322e-44
CNDP2	1.33813e-95	1.69984	0.502	0.112	2.76938e-91
BCS1L	1.69422e-16	1.69834	0.06	0.01	3.50636e-12
MRPL52	1.19214e-160	1.69566	0.834	0.214	2.46725e-156
MRPL34	1.97309e-107	1.69424	0.472	0.088	4.08351e-103
CUL7	2.05088e-06	1.69343	0.019	0.003	0.0424451
GTF2H5	3.46543e-108	1.69331	0.409	0.064	7.17206e-104
BLVRB	6.03053e-99	1.69137	0.828	0.384	1.24808e-94
PRIMPOL	8.12762e-08	1.6892	0.023	0.003	0.00168209
FARSA	3.92489e-26	1.68559	0.075	0.009	8.12296e-22
SRI	1.08021e-147	1.68297	0.847	0.24	2.2356e-143
KLRC2	1.05593e-09	1.68227	0.034	0.006	2.18536e-05
KLRD1	4.39544e-09	1.68144	0.06	0.018	9.0968e-05
GPRC5C	1.44918e-12	1.67963	0.049	0.009	2.99922e-08
ENTPD3-AS1	1.01787e-15	1.67926	0.047	0.006	2.10659e-11
ELAC2	9.58436e-33	1.67556	0.126	0.021	1.98358e-28
KRCC1	7.81573e-19	1.6755	0.074	0.013	1.61754e-14
MFAP3	8.48612e-08	1.67537	0.025	0.004	0.00175629
MTRNR2L12	3.38452e-113	1.67453	0.434	0.068	7.00459e-109
VRK2	2.21423e-46	1.67359	0.219	0.044	4.58258e-42
APIP	4.71545e-76	1.67284	0.313	0.054	9.75909e-72
NSF	1.28137e-66	1.67193	0.223	0.029	2.65192e-62
GFRA2	6.89895e-08	1.67177	0.028	0.005	0.00142781
DNAL4	4.95777e-11	1.67085	0.034	0.005	1.02606e-06
PMVK	2.52262e-85	1.6696	0.368	0.066	5.2208e-81
CYBC1	8.32013e-85	1.66874	0.302	0.043	1.72193e-80
TMED8	2.91169e-75	1.66694	0.294	0.047	6.02603e-71
MXRA7	1.49144e-25	1.66684	0.096	0.016	3.08667e-21
PDIA4	4.91346e-91	1.66648	0.506	0.12	1.01689e-86
TTC25	2.00805e-06	1.66455	0.019	0.003	0.0415585
DACH1	1.02579e-07	1.66092	0.017	0.002	0.00212298
TP53I3	7.79546e-82	1.66092	0.304	0.046	1.61335e-77
TRAPPC12	1.18666e-49	1.65923	0.168	0.023	2.45591e-45
INTS7	1.76011e-07	1.65913	0.019	0.002	0.00364273
SYNC	2.24316e-18	1.65862	0.072	0.012	4.64245e-14
PERP	8.0896e-09	1.65738	0.032	0.006	0.000167422
DFFA	3.98931e-55	1.65707	0.202	0.03	8.25627e-51
ECHDC2	7.05217e-25	1.65574	0.102	0.018	1.45952e-20
PFKP	6.21883e-53	1.65415	0.194	0.029	1.28705e-48
STT3A	4.77957e-43	1.65413	0.162	0.025	9.89179e-39
GNG11	5.64102e-36	1.65177	0.136	0.022	1.16746e-31
LSS	8.55457e-14	1.65078	0.051	0.009	1.77045e-09
AIFM1	9.45731e-37	1.65009	0.142	0.023	1.95729e-32
BPNT1	8.88501e-14	1.64783	0.047	0.007	1.83884e-09
HS3ST3B1	6.9198e-09	1.64753	0.034	0.006	0.000143212
STEAP3	6.81688e-30	1.64485	0.109	0.017	1.41082e-25
HGH1	4.92187e-11	1.64425	0.034	0.005	1.01863e-06
MAF	3.96336e-53	1.64378	0.23	0.042	8.20258e-49
SLIRP	6.28025e-150	1.64292	0.853	0.237	1.29976e-145
UQCC3	3.76432e-93	1.6421	0.358	0.056	7.79063e-89
ZNF181	2.26405e-07	1.64151	0.021	0.003	0.00468567
PPP2R5B	3.85625e-19	1.64116	0.066	0.01	7.98089e-15
CALR	2.54846e-112	1.64087	0.932	0.5	5.2743e-108
DHX33	1.17852e-23	1.63932	0.087	0.014	2.43906e-19
PIH1D1	1.38219e-100	1.63868	0.389	0.061	2.86058e-96
NCOA7	1.14262e-62	1.63667	0.264	0.047	2.36477e-58
PEX3	7.73926e-08	1.6357	0.026	0.004	0.00160172
DPP3	1.19173e-53	1.6346	0.215	0.036	2.4664e-49
AC136475.5	4.08964e-11	1.63414	0.049	0.01	8.46392e-07
AFG1L	2.30024e-07	1.63382	0.025	0.004	0.00476057
ME1	5.99066e-12	1.63305	0.038	0.005	1.23983e-07
SSH3	1.18765e-14	1.63229	0.047	0.007	2.45795e-10
RTN2	1.01773e-13	1.63172	0.045	0.007	2.1063e-09
ACAD9	5.43018e-34	1.63166	0.108	0.014	1.12383e-29
UGP2	9.69746e-91	1.62959	0.404	0.075	2.00699e-86
IPCEF1	1.05068e-24	1.62906	0.081	0.011	2.17449e-20
TLE1	3.82676e-55	1.62892	0.2	0.029	7.91986e-51
C20orf27	3.35052e-103	1.62767	0.728	0.253	6.93424e-99
SERPINB9	3.82846e-85	1.62739	0.44	0.097	7.92337e-81
GABARAPL2	1.55266e-111	1.6262	0.732	0.212	3.21338e-107
IFT27	2.04599e-26	1.62506	0.102	0.017	4.23437e-22
PRMT3	4.78785e-18	1.62298	0.074	0.013	9.90893e-14
GNPNAT1	8.61105e-33	1.62282	0.134	0.023	1.78214e-28
RTN4IP1	1.26056e-09	1.62254	0.032	0.005	2.60886e-05
POC1A	3.94279e-07	1.622	0.032	0.007	0.00815999
SLC25A17	2.75393e-07	1.62147	0.03	0.006	0.00569954
KIAA0391	6.4273e-07	1.62096	0.019	0.003	0.0133019
MIR4458HG	5.12382e-11	1.61826	0.038	0.006	1.06043e-06
BIRC3	4.43129e-40	1.61755	0.377	0.13	9.17099e-36
FAM114A2	1.65318e-34	1.61751	0.108	0.013	3.42141e-30
EPSTI1	9.75036e-21	1.61614	0.2	0.073	2.01793e-16
ENDOD1	4.55297e-18	1.61156	0.074	0.013	9.42283e-14
PLA2G12A	1.36783e-10	1.60958	0.038	0.006	2.83087e-06
EBNA1BP2	1.39963e-81	1.60755	0.355	0.063	2.89667e-77
IRF2	2.37449e-58	1.6062	0.236	0.04	4.91425e-54
SENCR	2.12368e-22	1.60559	0.074	0.01	4.39516e-18
NDUFAF3	3.40866e-111	1.60489	0.509	0.098	7.05457e-107
MTX2	9.94442e-25	1.60409	0.098	0.017	2.0581e-20
FLVCR1-DT	5.36472e-18	1.6039	0.055	0.007	1.11028e-13
WDR77	5.7933e-39	1.6037	0.147	0.023	1.19898e-34
DPH2	5.95099e-12	1.60153	0.043	0.007	1.23162e-07
IRF4	4.06161e-19	1.59876	0.123	0.033	8.40591e-15
ATP6V1D	1.94174e-89	1.59869	0.392	0.072	4.01862e-85
WASHC3	1.88013e-79	1.59792	0.325	0.055	3.89111e-75
SMIM4	4.96917e-106	1.59762	0.523	0.11	1.02842e-101
AC107871.1	2.04009e-06	1.59718	0.019	0.003	0.0422218
MCEE	9.03081e-23	1.59666	0.085	0.014	1.86902e-18
C5orf30	8.20935e-13	1.59513	0.043	0.007	1.69901e-08
PRDX1	5.21801e-124	1.5949	0.902	0.389	1.07992e-119
UBA1	2.09779e-117	1.59449	0.572	0.118	4.34158e-113
PKN3	1.27098e-06	1.5944	0.015	0.002	0.0263042
SH3RF3	3.85016e-14	1.59321	0.038	0.004	7.96829e-10
SPOUT1	5.79291e-17	1.59289	0.064	0.011	1.1989e-12
TNFSF13	2.35719e-08	1.5926	0.023	0.003	0.000487844
FMNL2	2.18729e-12	1.59153	0.04	0.006	4.52681e-08
MUC12	1.09131e-19	1.5891	0.075	0.013	2.25857e-15
ASCC1	1.99976e-18	1.58727	0.074	0.013	4.1387e-14
CKAP5	5.3925e-31	1.58598	0.104	0.014	1.11603e-26
EIF2B3	1.85423e-25	1.58305	0.091	0.014	3.83752e-21
AC002451.1	1.2037e-13	1.58251	0.032	0.003	2.49117e-09
IDH1-AS1	5.62573e-10	1.58161	0.021	0.002	1.1643e-05
PCGF6	4.97764e-17	1.57918	0.053	0.007	1.03017e-12
AC091729.3	8.37436e-12	1.57912	0.049	0.01	1.73316e-07
ACAT1	3.42633e-59	1.57812	0.234	0.038	7.09113e-55
PKP4	4.12105e-15	1.57717	0.055	0.009	8.52892e-11
B3GNT8	1.1633e-29	1.57713	0.083	0.009	2.40756e-25
TAP2	1.99172e-47	1.57713	0.253	0.057	4.12206e-43
ECHDC1	1.36455e-81	1.57704	0.358	0.065	2.82408e-77
ATP11C	9.50255e-42	1.57695	0.164	0.027	1.96665e-37
LINC00910	6.37895e-07	1.57602	0.019	0.003	0.0132019
ANKS1A	4.17284e-20	1.57579	0.074	0.012	8.63611e-16
FGD2	9.12945e-83	1.57395	0.391	0.077	1.88943e-78
GSTM1	6.48823e-07	1.57361	0.019	0.003	0.013428
SLC22A16	3.21349e-19	1.57347	0.062	0.009	6.65064e-15
DPYD	2.58395e-99	1.57292	0.498	0.106	5.34775e-95
PPP5C	2.70977e-24	1.57162	0.096	0.016	5.60815e-20
MS4A7	5.59056e-89	1.56494	0.642	0.207	1.15702e-84
RNASEH1-AS1	1.84348e-17	1.56445	0.055	0.007	3.81528e-13
COPB2	2.39025e-80	1.56426	0.285	0.041	4.94685e-76
HP	2.7476e-48	1.56412	0.162	0.022	5.68643e-44
SCAP	1.07459e-26	1.56379	0.102	0.016	2.22398e-22
AP001453.2	3.61766e-07	1.56011	0.028	0.006	0.00748711
STAB1	1.38826e-101	1.55919	0.543	0.122	2.87314e-97
AREG	1.26175e-08	1.55774	0.311	0.19	0.000261131
ATP2B4	4.59563e-37	1.55736	0.151	0.026	9.51112e-33
CAD	2.371e-08	1.55729	0.023	0.003	0.000490701
HHLA3	1.5588e-10	1.55572	0.034	0.005	3.22609e-06
FPGT	9.88369e-20	1.55552	0.062	0.008	2.04553e-15
DYNC1I2	2.84815e-79	1.55457	0.357	0.067	5.89454e-75
LMNB1	1.02991e-50	1.55144	0.27	0.061	2.1315e-46
ZC3H7B	8.87971e-37	1.54933	0.142	0.023	1.83775e-32
SMAP2	1.06669e-130	1.54869	0.879	0.312	2.20762e-126
ENOX2	1.17468e-28	1.54771	0.1	0.015	2.43112e-24
INSL3	7.96179e-11	1.5475	0.028	0.003	1.64777e-06
ACADM	5.17892e-29	1.54746	0.128	0.024	1.07183e-24
ZBTB11-AS1	8.56136e-09	1.54672	0.025	0.003	0.000177186
CNIH4	1.1971e-116	1.54619	0.717	0.199	2.47751e-112
C5orf15	3.73186e-73	1.54568	0.283	0.044	7.72346e-69
TXK	1.29665e-06	1.54545	0.04	0.011	0.0268354
BDH2	3.85695e-23	1.54532	0.081	0.012	7.98235e-19
DOCK1	4.72259e-07	1.54505	0.026	0.005	0.00977388
PCID2	2.66747e-46	1.54461	0.196	0.035	5.52059e-42
POGLUT1	7.93996e-47	1.54343	0.164	0.023	1.64325e-42
MPZL1	7.79056e-67	1.54097	0.255	0.04	1.61233e-62
AC110285.6	1.676e-06	1.53984	0.023	0.004	0.0346864
WDR7	9.27486e-25	1.53983	0.079	0.01	1.91952e-20
SNUPN	2.15652e-48	1.53927	0.17	0.024	4.46313e-44
CLCN3	4.05719e-29	1.53893	0.113	0.019	8.39675e-25
ANXA4	1.60146e-114	1.53801	0.568	0.118	3.31438e-110
RGS14	9.04116e-41	1.53704	0.158	0.026	1.87116e-36
KBTBD3	1.08643e-14	1.53558	0.055	0.009	2.24847e-10
SLC25A11	3.69893e-97	1.53372	0.449	0.086	7.65531e-93
ZNF444	6.52014e-17	1.53331	0.057	0.008	1.34941e-12
APCDD1	1.00826e-08	1.53251	0.026	0.004	0.000208669
FAM208A	6.30986e-79	1.53151	0.357	0.067	1.30589e-74
C11orf96	6.0941e-09	1.53087	0.04	0.009	0.000126124
PHGDH	5.13103e-08	1.53048	0.049	0.014	0.00106192
HIST1H2AL	9.46488e-09	1.52898	0.038	0.008	0.000195885
FBXO41	8.67518e-13	1.52873	0.055	0.011	1.79541e-08
SWI5	3.27088e-45	1.52814	0.175	0.028	6.7694e-41
SAYSD1	5.35022e-29	1.52789	0.106	0.016	1.10728e-24
KLF9	2.77186e-110	1.52614	0.772	0.247	5.73664e-106
TMEM131	7.84793e-69	1.5249	0.338	0.069	1.62421e-64
ERLIN1	1.01972e-20	1.52382	0.085	0.015	2.11041e-16
PAQR4	9.95006e-37	1.52266	0.128	0.018	2.05926e-32
GMNN	9.17503e-24	1.52112	0.115	0.024	1.89886e-19
FUT7	2.81197e-23	1.51936	0.077	0.011	5.81965e-19
DCK	4.68429e-74	1.51903	0.315	0.055	9.6946e-70
ATL3	3.41952e-108	1.51837	0.462	0.082	7.07704e-104
EMILIN1	4.58409e-11	1.51786	0.026	0.003	9.48723e-07
CCDC28B	4.54866e-23	1.51771	0.109	0.023	9.4139e-19
MAP2K1	1.35597e-116	1.51742	0.587	0.124	2.80631e-112
SLC4A2	1.04194e-40	1.5174	0.149	0.023	2.1564e-36
FIG4	1.36996e-36	1.51704	0.151	0.026	2.83528e-32
AL034397.3	2.19691e-106	1.51373	0.434	0.073	4.54674e-102
IARS2	2.15448e-84	1.51321	0.385	0.072	4.45892e-80
MRPS31	1.78094e-38	1.5123	0.149	0.024	3.68584e-34
CMTM5	3.96051e-10	1.51222	0.032	0.005	8.19668e-06
TMEM97	3.95365e-16	1.51139	0.062	0.011	8.18247e-12
F12	6.37854e-12	1.51133	0.038	0.005	1.3201e-07
NTSR1	4.84535e-36	1.50985	0.109	0.013	1.00279e-31
METTL6	1.05125e-24	1.5073	0.079	0.01	2.17567e-20
HIPK2	1.26658e-87	1.50628	0.445	0.094	2.62132e-83
BEX3	1.47039e-22	1.50623	0.091	0.016	3.04311e-18
DHODH	1.73128e-06	1.50329	0.023	0.004	0.0358306
SIGLEC11	8.58991e-10	1.50168	0.026	0.003	1.77777e-05
PSMB5	2.08944e-80	1.50157	0.375	0.073	4.32431e-76
GALM	7.37184e-15	1.50092	0.066	0.013	1.52568e-10
FASTKD1	5.37876e-16	1.50071	0.053	0.008	1.11319e-11
AC008915.2	7.60744e-14	1.49969	0.042	0.005	1.57443e-09
MAP4	3.34287e-84	1.49916	0.398	0.078	6.91841e-80
ATOH8	1.23238e-09	1.49905	0.03	0.004	2.55053e-05
NDUFB6	1.46071e-108	1.49717	0.547	0.116	3.02309e-104
RBM41	1.05694e-13	1.49675	0.058	0.011	2.18745e-09
ELP1	1.57764e-21	1.49602	0.07	0.01	3.26508e-17
BOLA2-SMG1P6	9.50385e-09	1.4954	0.038	0.008	0.000196692
B4GALT5	5.97376e-111	1.49172	0.604	0.141	1.23633e-106
DHFR	1.28942e-34	1.49165	0.151	0.028	2.66858e-30
SERPINB9P1	1.14665e-06	1.49152	0.03	0.007	0.0237311
ADCY3	7.90572e-44	1.49117	0.187	0.033	1.63617e-39
HDHD2	1.02706e-27	1.4895	0.098	0.015	2.1256e-23
MRPL20	1.37563e-125	1.48901	0.751	0.198	2.847e-121
HDDC3	5.62769e-45	1.48901	0.191	0.034	1.16471e-40
SELPLG	2.29318e-96	1.48888	0.468	0.094	4.74597e-92
EFL1	4.57359e-20	1.48871	0.068	0.01	9.46551e-16
RNF175	6.68158e-07	1.48811	0.023	0.004	0.0138282
MRPL24	2.42516e-51	1.48707	0.215	0.037	5.01911e-47
EMC9	3.56072e-27	1.48705	0.104	0.017	7.36927e-23
ECI2	3.48482e-37	1.48665	0.168	0.032	7.21219e-33
ENDOG	2.3413e-56	1.48653	0.226	0.037	4.84555e-52
PDIA6	3.14029e-104	1.48575	0.826	0.312	6.49915e-100
FAM129A	1.89388e-92	1.48509	0.53	0.128	3.91958e-88
MYO7A	5.93237e-28	1.48507	0.068	0.006	1.22776e-23
MAGOHB	1.31377e-50	1.48481	0.213	0.037	2.71897e-46
TNFAIP1	1.08432e-11	1.4847	0.047	0.009	2.24411e-07
KRT7	6.22321e-09	1.48347	0.047	0.012	0.000128796
BBS7	1.11487e-18	1.48275	0.068	0.011	2.30733e-14
ECH1	3.64225e-105	1.48186	0.579	0.135	7.53801e-101
IBTK	3.93379e-91	1.48126	0.402	0.073	8.14137e-87
TMED9	5.91018e-112	1.47615	0.621	0.146	1.22317e-107
ZNF93	3.5106e-09	1.47465	0.03	0.005	7.26554e-05
FAM120C	2.53529e-09	1.47333	0.042	0.009	5.24705e-05
PM20D2	3.18087e-11	1.47142	0.064	0.016	6.58313e-07
TMTC1	1.10936e-26	1.46996	0.098	0.015	2.29594e-22
THAP5	1.71955e-28	1.46983	0.119	0.021	3.55878e-24
GCNT1	2.0669e-34	1.4683	0.145	0.026	4.27766e-30
GATB	8.14135e-22	1.46793	0.079	0.012	1.68493e-17
ATP5MF	2.83319e-145	1.46705	0.974	0.515	5.86357e-141
MBLAC1	5.74811e-08	1.46614	0.03	0.006	0.00118963
NECTIN2	4.52104e-59	1.46515	0.379	0.099	9.35674e-55
AAMDC	2.5339e-47	1.46465	0.183	0.029	5.24416e-43
IL15RA	9.41407e-41	1.46394	0.187	0.036	1.94833e-36
IGSF8	4.12585e-17	1.46277	0.07	0.013	8.53887e-13
HSP90B1	1.36695e-80	1.46241	0.885	0.492	2.82903e-76
GOT1	4.41516e-11	1.46085	0.042	0.007	9.13761e-07
SPDL1	1.96367e-06	1.45999	0.021	0.003	0.0406402
MYDGF	5.05331e-111	1.45994	0.796	0.258	1.04583e-106
PREB	1.01926e-23	1.4591	0.092	0.016	2.10946e-19
MFSD13A	5.80081e-25	1.45884	0.089	0.013	1.20053e-20
PXMP4	1.47962e-15	1.45853	0.058	0.01	3.06221e-11
GOLIM4	2.92804e-50	1.45817	0.23	0.044	6.05987e-46
OGFOD1	7.84914e-16	1.45808	0.066	0.012	1.62446e-11
CNTLN	4.5765e-56	1.45767	0.242	0.043	9.47152e-52
MRPL17	1.29783e-40	1.45763	0.181	0.034	2.68599e-36
PRNCR1	8.0979e-08	1.45678	0.023	0.003	0.00167594
OGDH	1.96266e-65	1.45545	0.294	0.054	4.06192e-61
PSMG3-AS1	3.74526e-20	1.45492	0.066	0.009	7.75119e-16
GSTCD	5.78516e-07	1.45488	0.025	0.004	0.011973
BCKDHA	8.6603e-09	1.4546	0.025	0.003	0.000179234
HIKESHI	8.34535e-102	1.4542	0.468	0.088	1.72715e-97
MMP25	1.38923e-29	1.45376	0.1	0.014	2.87514e-25
LINC01063	9.86777e-09	1.45301	0.026	0.004	0.000204223
GIN1	1.02341e-08	1.45263	0.028	0.004	0.000211804
CEP44	1.62278e-21	1.45145	0.087	0.015	3.3585e-17
ITSN1	2.73857e-31	1.45091	0.111	0.016	5.66774e-27
NDUFAF1	9.13274e-23	1.45072	0.089	0.015	1.89011e-18
L3HYPDH	2.36867e-07	1.45071	0.025	0.004	0.00490221
COG6	3.51452e-09	1.45052	0.028	0.004	7.27365e-05
RFC4	1.38831e-11	1.45009	0.051	0.01	2.87326e-07
ETFB	3.22327e-120	1.44703	0.849	0.286	6.67087e-116
HNRNPAB	1.36554e-105	1.44658	0.691	0.193	2.82611e-101
ATP6V0C	9.30661e-19	1.44604	0.072	0.012	1.9261e-14
APTR	4.08241e-15	1.44508	0.049	0.007	8.44895e-11
THOC3	6.30542e-20	1.44379	0.083	0.015	1.30497e-15
THAP3	2.54836e-16	1.44313	0.079	0.017	5.27408e-12
CENPS	3.76065e-10	1.44122	0.036	0.006	7.78305e-06
C1orf21	8.14873e-18	1.44048	0.087	0.019	1.68646e-13
G6PD	5.97739e-101	1.43964	0.581	0.142	1.23708e-96
HENMT1	1.28569e-17	1.43919	0.074	0.014	2.66087e-13
DCTPP1	1.71054e-54	1.43836	0.245	0.046	3.54012e-50
NME2	1.11106e-66	1.43638	0.308	0.058	2.29945e-62
PTPN13	6.73637e-07	1.43597	0.023	0.004	0.0139416
PSMB8-AS1	9.30468e-48	1.43574	0.204	0.036	1.9257e-43
MRPL32	1.93603e-53	1.43497	0.253	0.05	4.0068e-49
PLEKHJ1	6.47741e-104	1.43422	0.519	0.107	1.34056e-99
MRPL19	1.87047e-42	1.43356	0.198	0.039	3.87113e-38
VARS2	2.93942e-14	1.43258	0.055	0.01	6.08342e-10
COA4	1.22597e-65	1.43134	0.302	0.057	2.53727e-61
FASN	3.50642e-42	1.43083	0.162	0.026	7.25688e-38
AC244090.1	4.99436e-47	1.43007	0.189	0.031	1.03363e-42
CLK2	3.83766e-19	1.42999	0.07	0.011	7.94241e-15
CEP97	7.68737e-07	1.42978	0.028	0.006	0.0159098
NAALADL1	3.25367e-28	1.42892	0.111	0.019	6.73379e-24
BASP1	2.3278e-10	1.42891	0.564	0.37	4.81761e-06
PSME2	9.03614e-56	1.4289	0.909	0.518	1.87012e-51
SLC1A5	1.26581e-45	1.42773	0.211	0.041	2.61973e-41
TRIM16	5.88693e-08	1.42742	0.03	0.006	0.00121836
LDHA	4.38261e-117	1.42707	0.96	0.58	9.07024e-113
SLC38A10	4.28977e-104	1.42605	0.458	0.083	8.87811e-100
HOPX	4.41356e-56	1.42581	0.187	0.025	9.13431e-52
SDC4	2.69639e-73	1.42573	0.377	0.08	5.58044e-69
ACYP1	2.30372e-17	1.42438	0.066	0.011	4.76777e-13
NDUFC1	8.97331e-118	1.42415	0.766	0.218	1.85712e-113
NRBP2	1.48145e-14	1.41908	0.04	0.004	3.06602e-10
MYH11	3.55243e-09	1.41855	0.03	0.005	7.3521e-05
RNF123	4.66971e-15	1.41838	0.055	0.009	9.66443e-11
EIPR1	1.21853e-46	1.41788	0.183	0.03	2.52187e-42
TRAFD1	3.04089e-38	1.41735	0.209	0.048	6.29343e-34
BATF3	4.59759e-27	1.41674	0.189	0.053	9.51518e-23
AL031775.1	2.38488e-08	1.4165	0.023	0.003	0.000493575
AGL	9.11812e-23	1.41577	0.089	0.015	1.88709e-18
DBI	2.06412e-148	1.41464	0.996	0.679	4.2719e-144
ZSWIM9	6.72255e-12	1.4142	0.04	0.006	1.3913e-07
PDHB	9.48111e-74	1.41392	0.355	0.07	1.96221e-69
LILRA5	3.08304e-76	1.41373	0.76	0.354	6.38065e-72
AFDN	1.56741e-18	1.41373	0.106	0.026	3.24391e-14
PDK4	2.12366e-67	1.41346	0.368	0.083	4.39512e-63
PHYKPL	7.00747e-90	1.41121	0.464	0.099	1.45027e-85
SNAPIN	4.61543e-70	1.40982	0.285	0.047	9.55209e-66
DAPP1	1.64799e-40	1.40972	0.368	0.126	3.41067e-36
RPUSD3	2.47459e-28	1.40887	0.126	0.024	5.12142e-24
UNC45A	6.02482e-43	1.40715	0.181	0.032	1.2469e-38
ANKRD39	1.11054e-34	1.40706	0.147	0.026	2.29838e-30
DROSHA	5.43566e-10	1.40612	0.042	0.008	1.12496e-05
BOLA1	3.48959e-09	1.40516	0.028	0.004	7.22205e-05
AC010226.1	1.53467e-13	1.40409	0.055	0.01	3.17615e-09
HOXA5	3.78367e-17	1.40337	0.077	0.016	7.83068e-13
PPID	1.62557e-59	1.40269	0.247	0.042	3.36429e-55
TRIM27	1.21891e-31	1.4023	0.138	0.025	2.52265e-27
RALA	1.97347e-46	1.4021	0.411	0.135	4.08429e-42
CD81	3.29257e-101	1.40163	0.775	0.259	6.81429e-97
TMEM223	1.36183e-13	1.40101	0.057	0.011	2.81845e-09
PRF1	2.89892e-09	1.40059	0.057	0.016	5.99961e-05
MTRF1	4.50772e-09	1.40058	0.038	0.008	9.32918e-05
PPP2R5D	6.30613e-21	1.39977	0.075	0.012	1.30512e-16
WDFY4	2.32757e-26	1.3992	0.179	0.049	4.81715e-22
MNDA	2.42901e-95	1.39689	0.889	0.43	5.02708e-91
AP002884.1	1.37448e-10	1.39548	0.038	0.006	2.84461e-06
AHCYL2	7.08156e-14	1.39525	0.055	0.01	1.4656e-09
DTYMK	8.66556e-46	1.39455	0.187	0.032	1.79342e-41
USP30-AS1	3.31977e-09	1.39359	0.04	0.008	6.87059e-05
KNOP1	1.04464e-21	1.39331	0.091	0.016	2.16199e-17
POLR2F	3.05596e-97	1.39219	0.547	0.126	6.32461e-93
UBA5	8.67156e-43	1.39026	0.174	0.029	1.79467e-38
BOLA3	2.93412e-61	1.39	0.309	0.065	6.07244e-57
CDK5	1.59687e-47	1.38919	0.196	0.034	3.30489e-43
LILRB2	2.87964e-78	1.3888	0.77	0.335	5.9597e-74
FLOT1	7.83845e-125	1.38757	0.789	0.214	1.62225e-120
HRH2	7.59914e-111	1.38692	0.668	0.172	1.57272e-106
NPTN	5.11082e-104	1.38682	0.502	0.1	1.05774e-99
CTSB	3.10645e-86	1.38533	0.911	0.653	6.42911e-82
TMOD3	2.02917e-99	1.38506	0.575	0.139	4.19957e-95
CPSF2	1.61007e-44	1.38458	0.204	0.039	3.33219e-40
POLR3B	7.88958e-07	1.38443	0.028	0.006	0.0163283
ABHD17C	2.68843e-18	1.38364	0.07	0.012	5.56398e-14
AC093525.7	4.18974e-10	1.38333	0.032	0.005	8.67109e-06
GLO1	4.75791e-88	1.38328	0.483	0.11	9.84698e-84
PSEN2	1.47816e-15	1.38293	0.057	0.009	3.05921e-11
RAB30	3.70301e-12	1.38114	0.087	0.026	7.66376e-08
SLC35A1	5.3051e-20	1.38057	0.087	0.016	1.09794e-15
ANKS6	3.55857e-09	1.3797	0.028	0.004	7.36481e-05
NEIL2	4.45703e-09	1.3781	0.038	0.008	9.22427e-05
CISD2	2.17838e-85	1.37737	0.404	0.078	4.50838e-81
TMEM255B	9.54069e-27	1.3769	0.1	0.016	1.97454e-22
TBCEL	5.39611e-11	1.37637	0.038	0.006	1.11678e-06
FAR2	1.59981e-24	1.37618	0.074	0.009	3.31098e-20
MOSMO	7.14759e-14	1.37541	0.062	0.013	1.47926e-09
PALB2	8.45002e-09	1.37503	0.032	0.006	0.000174882
CAB39L	2.08426e-12	1.37444	0.045	0.008	4.31358e-08
POLR2J2	6.13181e-16	1.37252	0.057	0.009	1.26904e-11
CMC1	9.60221e-69	1.37194	0.308	0.057	1.98727e-64
TRAM2	5.63911e-27	1.37158	0.111	0.02	1.16707e-22
GALE	1.60491e-37	1.37134	0.138	0.021	3.32151e-33
CERS6	1.45046e-79	1.37128	0.602	0.179	3.00187e-75
NMNAT1	4.87366e-16	1.37055	0.051	0.007	1.00865e-11
SNTB1	5.15414e-48	1.36938	0.185	0.029	1.0667e-43
GART	4.50513e-30	1.36887	0.132	0.025	9.32382e-26
MRPS34	5.34898e-86	1.3673	0.525	0.132	1.10702e-81
RAB28	1.83063e-29	1.36718	0.121	0.021	3.78866e-25
DYSF	2.09193e-83	1.36517	0.306	0.045	4.32946e-79
INTS3	5.11768e-20	1.36451	0.075	0.012	1.05915e-15
TNFSF10	1.6398e-41	1.36392	0.351	0.111	3.39372e-37
FKBP1B	1.53274e-33	1.36335	0.123	0.019	3.17215e-29
PRMT5	4.53344e-19	1.36237	0.081	0.015	9.38241e-15
COG4	2.02198e-25	1.36164	0.098	0.016	4.18469e-21
FZD2	1.07539e-13	1.36034	0.058	0.011	2.22562e-09
CRTC1	2.02278e-17	1.36009	0.068	0.012	4.18635e-13
NPM3	2.6474e-19	1.35934	0.087	0.017	5.47905e-15
ZMPSTE24	2.20876e-49	1.35872	0.225	0.042	4.57125e-45
PRMT2	2.30976e-101	1.3582	0.643	0.168	4.78027e-97
CARD8-AS1	9.12787e-26	1.35803	0.117	0.023	1.8891e-21
TTC7B	2.85777e-13	1.35622	0.043	0.006	5.91444e-09
DNPH1	3.1963e-74	1.35503	0.398	0.087	6.61507e-70
STS	5.76085e-25	1.35501	0.089	0.013	1.19227e-20
SLC2A13	2.4981e-10	1.35404	0.042	0.008	5.17007e-06
ACOX3	7.18388e-17	1.35384	0.058	0.009	1.48678e-12
KATNBL1	1.95614e-26	1.35316	0.123	0.024	4.04843e-22
NDUFAF2	1.9732e-68	1.35131	0.345	0.071	4.08374e-64
SQOR	5.44002e-113	1.3496	0.757	0.216	1.12587e-108
MBOAT2	1.47272e-29	1.3495	0.117	0.02	3.04794e-25
RIOX2	1.17218e-12	1.34831	0.058	0.012	2.42594e-08
LAIR1	1.64723e-98	1.34757	0.57	0.135	3.4091e-94
MMD	4.88475e-45	1.34756	0.266	0.065	1.01095e-40
COQ5	1.00167e-23	1.34662	0.096	0.017	2.07305e-19
ATP6V0E1	3.69693e-118	1.34654	0.949	0.445	7.65116e-114
COMMD1	3.19184e-83	1.34604	0.453	0.101	6.60584e-79
AC008443.5	2.34947e-07	1.3458	0.025	0.004	0.00486246
ATP6V1A	8.50793e-97	1.34484	0.545	0.127	1.7608e-92
CDPF1	8.58248e-09	1.34455	0.032	0.006	0.000177623
MRPL53	2.29056e-33	1.3442	0.128	0.021	4.74055e-29
COMMD8	3.1367e-101	1.344	0.555	0.124	6.49171e-97
OAS2	4.4466e-44	1.34351	0.179	0.03	9.20268e-40
WDR5	3.25525e-31	1.34331	0.149	0.03	6.73707e-27
MTFP1	6.74755e-07	1.34325	0.036	0.009	0.0139647
USP45	4.31437e-09	1.34239	0.038	0.008	8.92903e-05
VSIG10L	1.24771e-09	1.34072	0.03	0.004	2.58227e-05
TSPAN33	1.96909e-27	1.33963	0.33	0.134	4.07522e-23
TNFAIP3	8.90045e-82	1.33929	0.691	0.236	1.84204e-77
IFIH1	2.46832e-27	1.33845	0.136	0.029	5.10843e-23
ZFYVE19	7.1308e-20	1.33817	0.091	0.018	1.47579e-15
AL445524.1	9.85219e-97	1.33786	0.425	0.077	2.03901e-92
GCA	2.81941e-115	1.33758	0.792	0.242	5.83504e-111
ALG10B	1.49866e-07	1.33741	0.034	0.008	0.00310162
CLECL1	3.28345e-18	1.33712	0.132	0.039	6.79543e-14
GK	5.97499e-62	1.33701	0.247	0.04	1.23658e-57
CCT5	3.34435e-107	1.33593	0.721	0.204	6.92147e-103
ATP13A1	2.13554e-36	1.33497	0.168	0.033	4.41972e-32
TXNDC17	2.1493e-120	1.33476	0.875	0.291	4.44818e-116
SFXN4	2.70554e-36	1.33372	0.16	0.03	5.59939e-32
APEH	6.45063e-50	1.3332	0.221	0.041	1.33502e-45
SEMA7A	5.46391e-08	1.33307	0.049	0.014	0.00113081
AL357060.1	9.84792e-14	1.33277	0.058	0.011	2.03813e-09
CRYBG1	2.83293e-61	1.33201	0.355	0.084	5.86303e-57
MRVI1	7.2115e-10	1.33124	0.04	0.008	1.49249e-05
CLDND2	4.97991e-21	1.33021	0.098	0.02	1.03064e-16
CCDC58	4.37291e-19	1.33006	0.1	0.023	9.05018e-15
BRI3BP	8.67307e-61	1.32974	0.213	0.03	1.79498e-56
PPA2	1.66081e-70	1.32973	0.402	0.093	3.43722e-66
ARL6IP6	1.19877e-33	1.32951	0.168	0.035	2.48097e-29
LINC02158	1.05164e-10	1.3294	0.042	0.008	2.17648e-06
CCT7	1.36838e-80	1.32939	0.517	0.135	2.83201e-76
LRP8	1.56929e-18	1.32939	0.077	0.014	3.24781e-14
PAPSS1	1.34251e-80	1.32843	0.37	0.069	2.77846e-76
ENKD1	5.37313e-12	1.32835	0.036	0.005	1.11202e-07
DAAM1	3.46287e-21	1.32811	0.087	0.016	7.16676e-17
NOL3	3.54018e-18	1.32761	0.064	0.01	7.32675e-14
ATP13A2	5.96902e-41	1.32681	0.157	0.025	1.23535e-36
ARHGEF12	4.48731e-12	1.32633	0.058	0.013	9.28694e-08
C6orf120	6.19416e-40	1.32604	0.168	0.029	1.28194e-35
FOCAD	7.57095e-17	1.32489	0.047	0.005	1.56688e-12
KIAA1841	4.91936e-16	1.3246	0.062	0.011	1.01811e-11
PDE6G	1.03801e-10	1.32422	0.058	0.015	2.14826e-06
GNG10	3.44222e-45	1.32409	0.162	0.024	7.12402e-41
MESD	2.13537e-71	1.32278	0.377	0.082	4.41935e-67
POLA1	6.18788e-12	1.3226	0.042	0.007	1.28064e-07
ZDHHC12	1.23326e-71	1.32177	0.408	0.093	2.55235e-67
C2orf76	4.24903e-29	1.32122	0.117	0.02	8.79379e-25
HSDL2	4.43957e-55	1.3207	0.251	0.047	9.18813e-51
CRLS1	1.66972e-45	1.32057	0.211	0.041	3.45565e-41
HACE1	1.04157e-12	1.31821	0.034	0.004	2.15563e-08
PIK3AP1	1.45288e-77	1.3169	0.626	0.202	3.00689e-73
IL27RA	6.88266e-84	1.31677	0.447	0.096	1.42444e-79
ABHD8	4.43782e-51	1.31542	0.226	0.042	9.1845e-47
PPARG	1.20431e-47	1.31464	0.177	0.027	2.49243e-43
NFXL1	4.84849e-20	1.3144	0.068	0.01	1.00344e-15
MCTP2	2.69438e-51	1.31352	0.204	0.034	5.5763e-47
MRPS12	1.17686e-97	1.3133	0.592	0.143	2.43563e-93
PAXIP1-AS2	4.31288e-11	1.31318	0.042	0.007	8.92593e-07
AC093525.6	7.05055e-08	1.31285	0.028	0.005	0.00145918
SLC9A9	1.25369e-44	1.31256	0.204	0.039	2.59463e-40
MAN1A1	3.0556e-99	1.30928	0.487	0.098	6.32386e-95
EEF1AKMT4	7.91084e-18	1.30869	0.068	0.011	1.63723e-13
AC015982.1	1.61668e-15	1.30845	0.055	0.009	3.34588e-11
HIST1H2AC	2.31887e-64	1.30802	0.243	0.038	4.79913e-60
PIM1	5.22953e-110	1.3069	0.853	0.294	1.0823e-105
SPINDOC	9.86165e-09	1.30666	0.038	0.008	0.000204097
PTPA	3.59703e-59	1.30549	0.287	0.057	7.44441e-55
TTLL5	1.46427e-27	1.30455	0.104	0.016	3.03045e-23
ERG28	2.53127e-29	1.30436	0.151	0.033	5.23873e-25
PUM3	5.33429e-27	1.30358	0.142	0.031	1.10399e-22
DCPS	6.94992e-35	1.30355	0.181	0.039	1.43836e-30
LCLAT1	8.3066e-09	1.3035	0.032	0.006	0.000171913
PSMC5	1.62352e-90	1.30288	0.726	0.235	3.36003e-86
CALCRL	1.11559e-12	1.30283	0.062	0.014	2.30883e-08
ZNF205	1.70738e-06	1.30203	0.023	0.004	0.0353359
FAM124B	5.74685e-07	1.302	0.03	0.007	0.0118937
TMX3	2.01884e-47	1.30107	0.223	0.043	4.17819e-43
AC093525.4	1.12522e-18	1.29973	0.064	0.01	2.32875e-14
TSNAX	1.53339e-57	1.29967	0.274	0.053	3.17349e-53
SCOC	2.54035e-35	1.29944	0.153	0.028	5.25751e-31
ZNF213	2.73532e-17	1.29935	0.06	0.009	5.66101e-13
GMPPB	7.80021e-21	1.29873	0.096	0.019	1.61433e-16
2026-03-01	6.65849e-96	1.29859	0.677	0.2	1.37804e-91
SPTLC2	7.70015e-96	1.29767	0.545	0.126	1.59362e-91
LRG1	6.51668e-66	1.29758	0.287	0.052	1.34869e-61
REXO4	1.14413e-21	1.29698	0.104	0.022	2.3679e-17
ID1	1.46791e-50	1.29697	0.481	0.177	3.03799e-46
CD2BP2	4.06121e-81	1.29681	0.409	0.084	8.40509e-77
AK3	6.07624e-40	1.29667	0.247	0.062	1.25754e-35
SPRED2	2.89132e-30	1.29637	0.187	0.048	5.98388e-26
GNPDA1	3.71084e-58	1.29594	0.262	0.049	7.67996e-54
ECHDC3	3.21284e-27	1.29525	0.104	0.017	6.64929e-23
ITGB7	1.06463e-49	1.29504	0.281	0.065	2.20335e-45
COASY	2.74875e-60	1.29318	0.296	0.06	5.68881e-56
GIMAP6	1.66409e-13	1.29231	0.055	0.01	3.444e-09
TSFM	9.36978e-45	1.29205	0.255	0.059	1.93917e-40
AC092490.1	8.43688e-09	1.29197	0.032	0.006	0.00017461
COQ9	5.00116e-21	1.29167	0.085	0.015	1.03504e-16
MVP	1.39443e-108	1.29162	0.745	0.213	2.88591e-104
GALK1	3.60833e-81	1.29152	0.445	0.098	7.4678e-77
YIF1A	1.94037e-80	1.29144	0.451	0.102	4.0158e-76
ANAPC4	6.32942e-23	1.29143	0.094	0.017	1.30994e-18
AC091564.6	2.47293e-07	1.2913	0.023	0.003	0.00511798
AC245060.5	2.20213e-06	1.2899	0.026	0.006	0.0455752
LRRCC1	5.84321e-08	1.28957	0.03	0.006	0.00120931
IRF8	5.10511e-65	1.28954	0.591	0.199	1.05655e-60
AP3D1	1.90097e-77	1.28902	0.426	0.095	3.93424e-73
TMEM168	1.25529e-17	1.28846	0.074	0.014	2.59795e-13
KCNMA1	2.46176e-16	1.28811	0.091	0.022	5.09485e-12
CCDC86	2.4229e-11	1.28773	0.047	0.009	5.01443e-07
LINC01011	1.19378e-09	1.28684	0.03	0.004	2.47066e-05
ARHGAP18	3.18608e-60	1.28554	0.236	0.038	6.59391e-56
STAMBPL1	6.60406e-10	1.28373	0.04	0.008	1.36678e-05
FRRS1	1.898e-12	1.28346	0.047	0.008	3.9281e-08
PRKDC	2.99814e-76	1.28298	0.466	0.116	6.20495e-72
PPM1K	3.56295e-24	1.28269	0.128	0.029	7.37388e-20
MMS22L	1.31042e-09	1.28224	0.045	0.01	2.71205e-05
PTGES2	1.86158e-53	1.28222	0.281	0.061	3.85272e-49
ILK	4.96312e-82	1.28196	0.445	0.098	1.02717e-77
SIGLEC7	1.58448e-54	1.28194	0.242	0.044	3.27924e-50
GALNT7	1.08927e-43	1.28173	0.185	0.033	2.25436e-39
PSMC4	9.6293e-86	1.28173	0.509	0.121	1.99288e-81
SLC35B4	7.47092e-18	1.28016	0.07	0.012	1.54618e-13
GON7	2.11934e-29	1.27834	0.128	0.024	4.38618e-25
EIF2S2	1.17261e-98	1.27813	0.762	0.244	2.42683e-94
RBM14	3.88483e-49	1.27708	0.249	0.052	8.04005e-45
SKA2	1.95897e-51	1.27584	0.226	0.041	4.05429e-47
CBWD1	1.27104e-70	1.2756	0.357	0.073	2.63054e-66
MECR	1.45285e-15	1.2747	0.068	0.013	3.00683e-11
MT1F	1.79812e-28	1.27355	0.119	0.021	3.72138e-24
NAA25	1.08195e-31	1.27338	0.223	0.062	2.2392e-27
HTRA2	7.61122e-16	1.27331	0.074	0.015	1.57522e-11
LAPTM4B	5.90278e-07	1.27274	0.025	0.004	0.0122164
LMAN1	5.29037e-42	1.27272	0.247	0.059	1.09489e-37
FES	4.51582e-75	1.27266	0.423	0.096	9.34595e-71
HIST1H2BH	2.7883e-07	1.2726	0.03	0.006	0.00577067
IFITM2	1.1645e-87	1.27251	0.975	0.682	2.41004e-83
CTSA	1.64724e-89	1.27231	0.798	0.297	3.40913e-85
CNTD1	2.06899e-06	1.27078	0.019	0.003	0.0428198
AMPD3	1.57714e-30	1.27008	0.13	0.023	3.26406e-26
P2RY13	1.94137e-60	1.26844	0.345	0.08	4.01787e-56
VPS41	5.75844e-56	1.26741	0.257	0.048	1.19177e-51
DNAJC25-GNG10	8.72854e-10	1.2672	0.038	0.007	1.80646e-05
MRPL40	8.25364e-89	1.26682	0.494	0.11	1.70817e-84
TCEANC2	8.64785e-08	1.26637	0.025	0.004	0.00178976
EPB41L3	1.54251e-76	1.26546	0.443	0.103	3.19238e-72
FARS2	3.07529e-19	1.26492	0.091	0.019	6.36463e-15
TTLL12	1.30201e-20	1.26409	0.083	0.015	2.69464e-16
CTTNBP2NL	1.94802e-15	1.26406	0.094	0.025	4.03162e-11
RAB5B	1.4109e-47	1.26168	0.204	0.036	2.92001e-43
ATP5MD	4.09031e-113	1.26006	0.951	0.498	8.46532e-109
PTTG1	4.11255e-43	1.25983	0.219	0.047	8.51134e-39
C10orf88	1.70474e-06	1.25939	0.023	0.004	0.0352813
AC020915.3	1.92496e-08	1.25871	0.042	0.01	0.00039839
CDKN2C	1.42573e-26	1.25864	0.138	0.03	2.9507e-22
ADARB1	3.49916e-16	1.25844	0.066	0.012	7.24187e-12
TMEM260	1.82606e-09	1.25836	0.047	0.011	3.77921e-05
GSDMD	7.525e-91	1.25833	0.513	0.117	1.55737e-86
NRP2	3.60935e-14	1.2582	0.119	0.039	7.4699e-10
SNX17	2.06847e-104	1.25795	0.691	0.189	4.28091e-100
LMAN2	1.39305e-91	1.25766	0.728	0.233	2.88306e-87
AL117379.1	1.42523e-13	1.25651	0.057	0.011	2.94966e-09
PDCD5	2.93249e-94	1.25603	0.681	0.198	6.06908e-90
POLD3	7.88184e-31	1.25594	0.132	0.024	1.63122e-26
ATIC	3.40228e-30	1.25585	0.17	0.04	7.04136e-26
METTL5	1.09469e-73	1.25574	0.375	0.077	2.26558e-69
CTSC	1.37414e-78	1.25535	0.804	0.314	2.84393e-74
ROMO1	3.54704e-109	1.25503	0.913	0.367	7.34096e-105
HLCS	2.48345e-10	1.25422	0.042	0.008	5.13975e-06
NCAPD2	1.08151e-21	1.25384	0.098	0.019	2.2383e-17
NDUFS6	2.83723e-102	1.25321	0.919	0.407	5.87194e-98
HEATR5B	2.42878e-14	1.25312	0.064	0.013	5.0266e-10
PROSER2	9.00165e-34	1.25307	0.126	0.02	1.86298e-29
PGAM5	4.71388e-15	1.25222	0.079	0.018	9.75585e-11
NMI	4.65702e-91	1.25214	0.543	0.13	9.63816e-87
CDK6	1.06498e-62	1.25144	0.328	0.07	2.20407e-58
SMARCAD1	1.15869e-20	1.25094	0.098	0.02	2.39803e-16
OGG1	4.10044e-23	1.2508	0.102	0.019	8.48628e-19
UGCG	8.99643e-47	1.25054	0.347	0.101	1.8619e-42
CALM2	1.73339e-105	1.2504	0.958	0.546	3.58743e-101
DSC2	1.93917e-75	1.25024	0.319	0.055	4.0133e-71
CMSS1	4.86732e-20	1.24898	0.092	0.019	1.00734e-15
CBX8	2.29331e-06	1.24821	0.026	0.006	0.0474623
OSTM1	1.32709e-54	1.247	0.262	0.052	2.74654e-50
OSTF1	3.33076e-95	1.24541	0.798	0.273	6.89334e-91
TIMM10	5.7909e-97	1.24523	0.528	0.117	1.19849e-92
CETN3	5.83013e-07	1.24436	0.025	0.004	0.012066
NME4	7.08987e-83	1.24428	0.436	0.092	1.46732e-78
TLDC1	1.64743e-15	1.24361	0.057	0.009	3.40952e-11
ACLY	1.02371e-63	1.2436	0.338	0.073	2.11866e-59
TOM1L2	1.51882e-12	1.24322	0.051	0.01	3.14335e-08
NR1H3	1.60453e-11	1.24294	0.043	0.008	3.32073e-07
MARC1	1.55687e-45	1.24261	0.181	0.03	3.2221e-41
ITPA	1.1757e-83	1.2426	0.53	0.134	2.43323e-79
AL139384.1	9.19759e-18	1.24259	0.064	0.01	1.90353e-13
EEA1	1.21348e-31	1.24254	0.181	0.043	2.51142e-27
LAMTOR2	8.91764e-92	1.2423	0.8	0.296	1.84559e-87
OSCAR	9.4106e-87	1.24185	0.457	0.097	1.94762e-82
SCRIB	3.00777e-14	1.24116	0.072	0.016	6.22488e-10
UQCR10	1.23693e-112	1.24085	0.957	0.486	2.55994e-108
COQ8B	8.7178e-24	1.24054	0.096	0.017	1.80424e-19
FO393401.1	4.0484e-60	1.2402	0.292	0.058	8.37858e-56
DCAF6	1.04151e-39	1.23993	0.192	0.039	2.15551e-35
MRPS16	5.82284e-81	1.23966	0.485	0.116	1.2051e-76
PRRG4	2.73982e-45	1.23959	0.215	0.042	5.67032e-41
MITD1	1.47722e-37	1.23838	0.17	0.032	3.05725e-33
ACPP	4.86724e-63	1.23759	0.328	0.07	1.00732e-58
TMEM87B	5.26724e-37	1.23694	0.157	0.028	1.09011e-32
NMT1	1.74795e-74	1.23636	0.379	0.078	3.61756e-70
F2RL1	4.11568e-13	1.2362	0.036	0.004	8.5178e-09
AC060780.1	1.53698e-16	1.23611	0.077	0.016	3.18093e-12
NIPSNAP3A	8.81401e-50	1.2359	0.294	0.07	1.82415e-45
PSMA5	4.47743e-96	1.23583	0.734	0.227	9.26648e-92
LILRA1	4.28493e-59	1.23553	0.521	0.168	8.86809e-55
ZSCAN16-AS1	1.66869e-78	1.23526	0.534	0.146	3.45352e-74
DESI1	1.04339e-65	1.23522	0.392	0.093	2.1594e-61
MPIG6B	5.35884e-12	1.23473	0.043	0.007	1.10906e-07
ANKS3	1.6412e-06	1.23416	0.028	0.006	0.0339662
FAM174A	2.73845e-19	1.23394	0.096	0.021	5.66749e-15
IQCG	1.35882e-15	1.23292	0.06	0.01	2.81222e-11
GSTM3	1.61426e-08	1.23226	0.045	0.011	0.000334088
H2AFZ	4.36779e-51	1.23064	0.923	0.544	9.03957e-47
HCK	2.16992e-96	1.2303	0.785	0.259	4.49087e-92
CUL1	4.32324e-44	1.2301	0.245	0.056	8.94738e-40
BLM	3.18698e-10	1.2298	0.053	0.013	6.59578e-06
FBXL15	3.43092e-84	1.22942	0.474	0.107	7.10063e-80
PHETA2	1.41174e-06	1.22938	0.025	0.005	0.0292173
ENO1	8.17065e-139	1.22797	0.991	0.771	1.691e-134
U62317.2	2.00002e-09	1.22659	0.038	0.007	4.13923e-05
COMT	1.32176e-91	1.22485	0.787	0.272	2.73551e-87
GTF3C6	9.96611e-97	1.22479	0.862	0.332	2.06259e-92
RAD17	1.82349e-23	1.2243	0.125	0.028	3.77389e-19
HDGFL3	1.34299e-27	1.224	0.153	0.035	2.77946e-23
MRPL18	3.58373e-66	1.22345	0.349	0.075	7.41688e-62
JAK3	6.7055e-85	1.2234	0.468	0.104	1.38777e-80
PIGO	3.15082e-16	1.22271	0.074	0.015	6.52093e-12
RPA3	1.37533e-61	1.22216	0.336	0.074	2.84638e-57
AC067930.4	5.08544e-11	1.22169	0.034	0.005	1.05248e-06
NUP37	1.61441e-17	1.22154	0.092	0.021	3.34119e-13
MGST1	3.15037e-77	1.22151	0.63	0.215	6.52001e-73
PSMA2	1.98472e-84	1.2213	0.794	0.3	4.10758e-80
CD36	5.34127e-60	1.21756	0.706	0.339	1.10543e-55
CFAP298	3.94282e-25	1.21724	0.119	0.024	8.16005e-21
RFT1	1.19555e-13	1.21717	0.072	0.017	2.47431e-09
RHBDD3	1.65534e-27	1.21601	0.1	0.015	3.42589e-23
FKBP2	5.99185e-77	1.21579	0.66	0.223	1.24007e-72
TRUB2	8.26584e-19	1.21546	0.077	0.014	1.7107e-14
DOHH	4.3522e-18	1.21315	0.089	0.019	9.00731e-14
TM7SF2	4.23563e-15	1.21288	0.053	0.008	8.76606e-11
MDH1	1.10722e-75	1.21244	0.494	0.127	2.29149e-71
MTHFD2	3.4343e-80	1.2116	0.5	0.125	7.10763e-76
DNAJC15	4.14362e-93	1.21109	0.843	0.305	8.57563e-89
GSPT1	4.56146e-74	1.21083	0.408	0.09	9.44039e-70
CD300A	1.50505e-65	1.21034	0.377	0.088	3.11484e-61
ALCAM	7.65266e-59	1.21015	0.349	0.084	1.58379e-54
UBE2V1	2.18599e-51	1.20927	0.283	0.063	4.52413e-47
PDCD2L	1.28445e-09	1.20918	0.042	0.009	2.6583e-05
ARPC5	6.60672e-108	1.20895	0.955	0.63	1.36733e-103
FARP1	1.56856e-07	1.20891	0.034	0.008	0.00324628
VPS45	2.71385e-26	1.20821	0.115	0.022	5.61658e-22
CDCA7L	1.15487e-10	1.20639	0.068	0.019	2.39012e-06
CDC26	9.6384e-84	1.20549	0.47	0.105	1.99476e-79
DHCR7	1.14375e-14	1.20512	0.055	0.009	2.36711e-10
RNF170	9.34682e-22	1.20435	0.077	0.012	1.93442e-17
CTSD	9.29558e-51	1.20431	0.86	0.83	1.92381e-46
TLR5	7.14424e-27	1.20409	0.109	0.019	1.47857e-22
WASF1	4.09806e-19	1.20357	0.066	0.01	8.48134e-15
SEC23B	1.30506e-46	1.20322	0.243	0.052	2.70095e-42
ELP6	7.92006e-25	1.20278	0.123	0.026	1.63913e-20
TFPT	2.12142e-70	1.20156	0.368	0.078	4.39048e-66
ROCK2	2.08235e-23	1.2015	0.117	0.025	4.30964e-19
TTC1	5.66472e-58	1.20141	0.308	0.067	1.17237e-53
CHCHD1	6.48079e-84	1.20065	0.449	0.097	1.34126e-79
APAF1	7.66699e-37	1.19919	0.175	0.035	1.58676e-32
TRUB1	3.85446e-08	1.19778	0.053	0.016	0.000797719
SLC10A7	7.85673e-18	1.1969	0.062	0.01	1.62603e-13
RAB9A	2.06502e-50	1.19615	0.398	0.118	4.27376e-46
RPS17	1.85101e-91	1.19611	0.926	0.501	3.83086e-87
PLCL1	1.73051e-10	1.1955	0.049	0.011	3.58147e-06
ANKRD6	3.01769e-09	1.19546	0.034	0.006	6.24542e-05
FLNB	1.37979e-44	1.19507	0.206	0.039	2.85562e-40
SCD	5.2547e-25	1.19496	0.123	0.026	1.08751e-20
ORC5	2.28157e-07	1.19244	0.025	0.004	0.00472193
TMX1	1.58153e-87	1.19157	0.515	0.12	3.27314e-83
CDYL2	2.79953e-31	1.19028	0.14	0.026	5.7939e-27
TRMT13	1.07059e-07	1.19022	0.036	0.008	0.00221569
BORCS8	5.05763e-51	1.19013	0.232	0.043	1.04673e-46
TRIM14	9.99046e-41	1.18958	0.209	0.044	2.06763e-36
AL080276.2	1.44088e-08	1.18936	0.04	0.009	0.000298204
KATNAL1	8.63603e-09	1.18934	0.032	0.006	0.000178731
HACD3	1.64965e-15	1.18863	0.089	0.022	3.41411e-11
CYP2R1	1.8106e-18	1.18737	0.083	0.016	3.74721e-14
SLC30A9	6e-49	1.18725	0.249	0.052	1.24176e-44
RPS27L	3.42494e-80	1.18722	0.877	0.384	7.08827e-76
MAPKBP1	6.89418e-10	1.1872	0.045	0.01	1.42682e-05
RFTN1	2.97417e-30	1.18659	0.266	0.087	6.15534e-26
ABHD11	8.74968e-41	1.1857	0.177	0.032	1.81083e-36
AC027644.3	6.20235e-43	1.18559	0.219	0.046	1.28364e-38
SEC22A	3.33793e-09	1.18481	0.032	0.005	6.90819e-05
TROAP	4.8685e-11	1.18461	0.034	0.005	1.00758e-06
MIIP	1.12733e-62	1.1845	0.342	0.075	2.33312e-58
ATP8B4	1.08014e-20	1.18228	0.108	0.024	2.23546e-16
ZNF720	1.38401e-13	1.18089	0.057	0.011	2.86434e-09
TDRD7	6.85936e-13	1.18067	0.049	0.009	1.41961e-08
DCAF17	1.591e-12	1.18045	0.064	0.015	3.29274e-08
GPATCH4	1.59749e-26	1.18037	0.136	0.029	3.30617e-22
RFC2	3.98963e-41	1.17934	0.181	0.033	8.25694e-37
CEP83	7.38908e-13	1.17775	0.057	0.011	1.52924e-08
HK1	1.01467e-76	1.1761	0.532	0.143	2.09996e-72
DENND2D	2.84539e-23	1.17598	0.115	0.024	5.88881e-19
ADPRH	3.90284e-20	1.17527	0.104	0.023	8.07732e-16
ATOX1	3.66758e-79	1.17411	0.911	0.43	7.59041e-75
PHC2	1.30171e-82	1.1738	0.683	0.226	2.69402e-78
DPY30	2.05105e-54	1.17311	0.275	0.057	4.24484e-50
FLOT2	6.76162e-90	1.17263	0.591	0.156	1.39939e-85
VAMP8	9.6874e-96	1.17246	0.96	0.559	2.0049e-91
MCMBP	2.21765e-56	1.17191	0.279	0.056	4.58965e-52
PCBD2	8.25145e-29	1.17177	0.125	0.023	1.70772e-24
IGHA1	3.6256e-33	1.17163	0.096	0.011	7.50354e-29
AAMP	2.3212e-51	1.1709	0.304	0.072	4.80395e-47
UROD	9.17017e-62	1.17071	0.317	0.066	1.89786e-57
CIDEB	9.84675e-48	1.17042	0.206	0.037	2.03788e-43
ZNF503-AS2	7.16227e-07	1.17019	0.021	0.003	0.014823
TTC37	1.91103e-52	1.17	0.251	0.049	3.95506e-48
ITPKC	3.67873e-08	1.16995	0.034	0.007	0.000761349
FBXO4	8.88903e-11	1.16937	0.057	0.014	1.83967e-06
CXorf40A	5.41886e-16	1.16926	0.087	0.021	1.12149e-11
BNIP3	8.55474e-26	1.16884	0.117	0.023	1.77049e-21
CTU2	2.54245e-15	1.16836	0.07	0.014	5.26185e-11
FAM198B	6.44096e-79	1.16817	0.472	0.113	1.33302e-74
DLGAP1-AS1	5.33678e-18	1.16736	0.081	0.016	1.1045e-13
AKIP1	1.0316e-21	1.16714	0.119	0.028	2.13499e-17
AC104986.2	4.45073e-09	1.16557	0.038	0.008	9.21124e-05
DOCK7	2.50307e-12	1.16539	0.062	0.014	5.18034e-08
CD63	3.32969e-97	1.16493	0.994	0.807	6.89114e-93
TMCO4	2.81735e-10	1.16451	0.057	0.014	5.83079e-06
TTC9C	2.00181e-32	1.16374	0.119	0.018	4.14294e-28
DGKH	7.02357e-10	1.16362	0.045	0.01	1.4536e-05
ZBTB47	8.5887e-08	1.16264	0.025	0.004	0.00177752
ZC3HC1	1.64512e-08	1.1623	0.034	0.007	0.000340474
NDUFA7	8.31681e-50	1.16148	0.274	0.061	1.72125e-45
ZC3H12C	2.16796e-10	1.16124	0.055	0.013	4.48681e-06
MAP2K6	1.66456e-14	1.16123	0.066	0.014	3.44497e-10
MRPL1	1.23771e-34	1.16101	0.187	0.042	2.56157e-30
TGM2	4.73494e-26	1.16075	0.123	0.025	9.79943e-22
LTB4R	6.50069e-78	1.15976	0.391	0.08	1.34538e-73
PDCD11	7.26946e-11	1.15963	0.045	0.009	1.50449e-06
ANKRD16	1.38396e-06	1.15925	0.025	0.005	0.0286424
NISCH	1.31657e-72	1.15923	0.389	0.084	2.72478e-68
XRCC4	1.35786e-39	1.15896	0.149	0.023	2.81022e-35
NANS	7.17634e-79	1.15862	0.598	0.175	1.48522e-74
GADD45GIP1	3.57345e-91	1.15762	0.838	0.309	7.39561e-87
ELMO2	2.91689e-33	1.15683	0.162	0.033	6.0368e-29
AL451069.2	2.07132e-09	1.15602	0.038	0.007	4.28681e-05
NDUFS1	1.67444e-60	1.1554	0.338	0.075	3.46542e-56
INVS	2.61072e-10	1.15529	0.042	0.008	5.40316e-06
MOSPD2	3.13838e-20	1.1542	0.096	0.02	6.4952e-16
MOGS	5.66038e-27	1.15305	0.128	0.026	1.17147e-22
PSMD3	6.34066e-68	1.15304	0.413	0.1	1.31226e-63
ALDH4A1	1.12744e-12	1.15229	0.053	0.01	2.33335e-08
CD151	6.40513e-78	1.15228	0.549	0.15	1.32561e-73
GPR157	6.49856e-12	1.15198	0.066	0.016	1.34494e-07
SUSD3	3.38756e-13	1.15168	0.085	0.023	7.0109e-09
ACAD10	7.53114e-12	1.15118	0.051	0.01	1.55865e-07
RAD18	1.28249e-08	1.15101	0.043	0.01	0.000265425
SMC1A	1.35113e-69	1.14938	0.421	0.101	2.7963e-65
TMLHE	4.30391e-22	1.14909	0.094	0.017	8.90737e-18
NBPF1	3.82427e-07	1.14853	0.028	0.006	0.00791472
KHK	9.8625e-09	1.14847	0.03	0.005	0.000204114
FOXRED1	1.35998e-16	1.14817	0.068	0.012	2.81462e-12
TCTEX1D2	1.41491e-19	1.14757	0.091	0.018	2.92831e-15
POFUT1	3.8347e-27	1.14719	0.102	0.016	7.93629e-23
TMEM208	1.92218e-84	1.14706	0.547	0.139	3.97815e-80
FAM13A	1.35626e-10	1.14687	0.06	0.016	2.80692e-06
NIT2	2.65399e-32	1.14633	0.209	0.055	5.49269e-28
AL365205.1	1.36374e-09	1.14631	0.049	0.012	2.8224e-05
RGS3	9.65592e-11	1.14606	0.049	0.01	1.99839e-06
HEMK1	7.7253e-15	1.14538	0.068	0.014	1.59883e-10
DNAJC27-AS1	1.15988e-06	1.1452	0.03	0.007	0.0240049
YWHAE	1.14237e-87	1.14517	0.877	0.377	2.36424e-83
AGFG1	1.7583e-69	1.14499	0.802	0.36	3.63898e-65
AGGF1	6.87092e-21	1.14486	0.091	0.017	1.42201e-16
NBAS	2.82869e-22	1.14419	0.104	0.021	5.85426e-18
RBBP9	3.09173e-12	1.14372	0.051	0.01	6.39864e-08
AK2	8.60193e-56	1.14366	0.328	0.077	1.78026e-51
PDE6D	9.61598e-25	1.1432	0.119	0.024	1.99012e-20
MRPS6	3.82769e-53	1.14231	0.342	0.086	7.92178e-49
UCP2	2.5125e-69	1.14218	0.853	0.429	5.19986e-65
DYNLRB1	3.4299e-92	1.14185	0.751	0.239	7.09852e-88
FAM173A	5.39533e-72	1.14185	0.504	0.135	1.11662e-67
TRAF3IP2	2.60776e-30	1.14101	0.132	0.024	5.39701e-26
TMEM129	3.45791e-17	1.14059	0.079	0.016	7.15649e-13
SLC46A3	3.97878e-10	1.1403	0.055	0.014	8.23448e-06
SINHCAF	4.21581e-31	1.13928	0.381	0.15	8.72503e-27
HMGB2	6.57597e-91	1.13773	0.853	0.358	1.36096e-86
CLEC12A	3.05902e-71	1.13761	0.504	0.138	6.33096e-67
FAHD2A	1.61387e-19	1.13743	0.109	0.026	3.34006e-15
PELI3	1.439e-22	1.13723	0.106	0.021	2.97816e-18
GCNT2	1.62352e-15	1.13674	0.077	0.017	3.36005e-11
NUDT18	1.21648e-16	1.13624	0.075	0.015	2.51763e-12
LARP4B	6.99695e-43	1.13576	0.206	0.041	1.44809e-38
CDC42BPA	6.42441e-12	1.13569	0.038	0.005	1.3296e-07
TMEM161A	1.80358e-12	1.13532	0.06	0.013	3.7327e-08
GNGT2	9.28389e-26	1.13476	0.149	0.036	1.92139e-21
PDRG1	7.00318e-25	1.13473	0.147	0.036	1.44938e-20
G6PC3	4.23411e-43	1.13426	0.243	0.056	8.76291e-39
SAP30L	1.81446e-35	1.13301	0.213	0.052	3.75521e-31
EFTUD2	1.92914e-67	1.13268	0.423	0.104	3.99255e-63
HIST1H1D	1.30386e-60	1.13171	0.46	0.137	2.69846e-56
ZNF584	1.33677e-07	1.12962	0.03	0.006	0.00276658
C12orf29	1.03129e-09	1.12956	0.053	0.013	2.13436e-05
CLSPN	3.37051e-09	1.1287	0.04	0.008	6.9756e-05
TICAM2	3.3226e-11	1.12864	0.045	0.009	6.87646e-07
HELB	8.71585e-13	1.12816	0.064	0.015	1.80383e-08
CSRP1	1.09023e-71	1.12815	0.458	0.114	2.25634e-67
POLD4	4.09477e-38	1.12719	0.181	0.036	8.47454e-34
CSTF3	2.97903e-18	1.12696	0.091	0.02	6.1654e-14
GEMIN8	9.59376e-09	1.12584	0.045	0.011	0.000198553
TOP1MT	2.24403e-31	1.12572	0.177	0.042	4.64424e-27
AC073352.2	2.78063e-07	1.12541	0.03	0.006	0.00575479
SEPSECS-AS1	4.03218e-15	1.12491	0.072	0.015	8.345e-11
FAM206A	1.21955e-18	1.12432	0.092	0.02	2.52398e-14
RHOBTB1	5.9763e-07	1.12413	0.025	0.004	0.0123685
PCTP	3.61097e-30	1.12404	0.157	0.034	7.47327e-26
TRIM7	3.7335e-38	1.12383	0.174	0.033	7.72686e-34
C11orf68	1.56018e-15	1.12339	0.085	0.02	3.22894e-11
RAB29	1.29478e-39	1.12333	0.213	0.047	2.67968e-35
ATP5MGL	1.04044e-08	1.12288	0.053	0.015	0.00021533
MIF	2.84995e-87	1.12287	0.913	0.431	5.89825e-83
CLPP	7.79671e-78	1.12282	0.483	0.117	1.61361e-73
PSMD1	1.32285e-69	1.12199	0.442	0.11	2.73778e-65
ORMDL3	3.19911e-10	1.12181	0.068	0.02	6.62088e-06
PPME1	6.7467e-21	1.12134	0.077	0.012	1.3963e-16
ETV2	6.00211e-08	1.12129	0.03	0.006	0.0012422
CSTF2T	1.68795e-28	1.12095	0.151	0.034	3.49338e-24
SRP14-AS1	2.55763e-09	1.12011	0.036	0.007	5.29326e-05
PDAP1	5.39362e-78	1.11936	0.566	0.156	1.11626e-73
AC004241.1	2.90988e-07	1.11929	0.03	0.006	0.00602228
ZBED6CL	4.11771e-08	1.11886	0.019	0.002	0.000852202
CTSL	1.36829e-22	1.11879	0.538	0.278	2.83181e-18
HIBADH	1.66388e-17	1.11827	0.079	0.016	3.44356e-13
ANKRD28	1.15042e-76	1.11772	0.598	0.179	2.38092e-72
MT-ATP8	1.10025e-81	1.11747	0.549	0.143	2.27707e-77
NUP50-DT	4.51815e-19	1.11703	0.083	0.016	9.35077e-15
MSRB1	1.32481e-72	1.11629	0.408	0.092	2.74183e-68
MTERF3	9.70104e-09	1.11602	0.038	0.008	0.000200773
SLFN12L	6.87374e-07	1.11484	0.036	0.009	0.0142259
TBXAS1	5.95953e-72	1.1148	0.7	0.255	1.23338e-67
KIF2A	5.67404e-29	1.11464	0.287	0.099	1.1743e-24
NEK7	1.5534e-31	1.11331	0.17	0.038	3.21493e-27
PEX14	3.30302e-36	1.11295	0.17	0.033	6.83593e-32
MISP3	3.46218e-10	1.11242	0.053	0.013	7.16532e-06
NDUFA3	3.58049e-91	1.11216	0.898	0.381	7.41018e-87
UBL5	7.32489e-99	1.11184	0.968	0.58	1.51596e-94
SDHAF4	1.6777e-15	1.11104	0.055	0.009	3.47217e-11
MSRB2	8.59312e-71	1.1105	0.432	0.105	1.77843e-66
ZNF22	2.80979e-32	1.11046	0.196	0.048	5.81514e-28
OPTN	1.35128e-24	1.11022	0.162	0.043	2.7966e-20
C11orf54	5.15872e-19	1.10978	0.079	0.015	1.06765e-14
CUTC	3.81822e-39	1.10944	0.2	0.042	7.90219e-35
SERPING1	3.18014e-18	1.10898	0.085	0.017	6.58162e-14
FCF1	1.68922e-28	1.10829	0.147	0.032	3.49601e-24
MRPL3	1.68847e-60	1.10762	0.4	0.103	3.49446e-56
ACAP1	4.50616e-58	1.10668	0.375	0.095	9.32594e-54
RBL1	6.04727e-14	1.10658	0.075	0.018	1.25154e-09
DLAT	1.3612e-23	1.10531	0.104	0.02	2.81713e-19
VAMP5	1.16708e-68	1.10513	0.877	0.406	2.41538e-64
SARS2	4.12974e-11	1.10365	0.06	0.015	8.54692e-07
SLC35E3	5.12154e-35	1.10242	0.183	0.04	1.05995e-30
TMEM44-AS1	5.70366e-12	1.10226	0.045	0.008	1.18043e-07
PLXNC1	5.5067e-79	1.10182	0.513	0.13	1.13967e-74
FAM213A	9.66233e-15	1.10111	0.075	0.017	1.99971e-10
POMP	1.55253e-93	1.10109	0.979	0.641	3.21312e-89
CRAT	4.56984e-34	1.10109	0.153	0.029	9.45773e-30
SDSL	6.4301e-12	1.10106	0.064	0.016	1.33077e-07
SPTLC1	3.01237e-64	1.10047	0.396	0.095	6.23441e-60
VPS25	9.53237e-61	1.10035	0.394	0.1	1.97282e-56
CASD1	1.17575e-10	1.09854	0.068	0.019	2.43334e-06
SUGP1	7.20638e-26	1.09819	0.126	0.026	1.49143e-21
TSPAN5	1.03594e-08	1.09787	0.042	0.01	0.000214397
GALK2	5.36455e-11	1.09728	0.036	0.005	1.11025e-06
MTFMT	3.37499e-15	1.09714	0.077	0.017	6.98487e-11
GPX7	5.23425e-09	1.09706	0.042	0.009	0.000108328
DERA	2.5038e-52	1.09686	0.306	0.071	5.18186e-48
COMTD1	3.10632e-41	1.09681	0.211	0.045	6.42884e-37
SNX1	1.38317e-47	1.09651	0.253	0.055	2.8626e-43
AL158212.2	2.09813e-11	1.09645	0.049	0.01	4.34228e-07
SPRYD4	2.72116e-13	1.09468	0.058	0.012	5.63172e-09
COMMD10	9.91645e-53	1.09452	0.264	0.054	2.05231e-48
ATF5	1.45319e-29	1.09337	0.381	0.151	3.00752e-25
CDKN2A	1.89927e-09	1.09326	0.043	0.01	3.93072e-05
URB2	1.3524e-06	1.09308	0.038	0.01	0.0279893
RNLS	9.87848e-09	1.09211	0.03	0.005	0.000204445
PMAIP1	1.4837e-10	1.09186	0.343	0.21	3.07067e-06
OMA1	2.04341e-07	1.09184	0.036	0.009	0.00422903
FOLR3	4.89445e-43	1.09178	0.238	0.053	1.01296e-38
PREPL	1.0052e-16	1.0907	0.077	0.016	2.08036e-12
ASH2L	1.49359e-23	1.09027	0.121	0.026	3.09114e-19
MICAL3	3.63895e-08	1.08865	0.042	0.01	0.000753116
PON2	2.08181e-27	1.08853	0.183	0.049	4.3085e-23
IPO8	2.34632e-35	1.0885	0.179	0.038	4.85595e-31
NUDCD2	9.44263e-52	1.08848	0.33	0.083	1.95425e-47
TMEM128	2.53867e-22	1.08796	0.106	0.022	5.25403e-18
PARP1	1.90747e-47	1.08782	0.289	0.071	3.94769e-43
CCDC151	2.97679e-20	1.08745	0.085	0.016	6.16077e-16
GPR137B	1.55814e-27	1.08743	0.242	0.079	3.22473e-23
ATP8B2	4.27117e-07	1.08736	0.032	0.007	0.00883962
SOS1	9.03113e-18	1.08667	0.089	0.019	1.86908e-13
SPECC1	1.61246e-48	1.08658	0.343	0.094	3.33715e-44
MRPS24	1.13704e-16	1.08654	0.07	0.013	2.35323e-12
SLC25A40	2.67261e-15	1.0865	0.07	0.014	5.53124e-11
MMS19	1.60757e-21	1.08634	0.098	0.019	3.32703e-17
DAD1	2.50576e-81	1.08623	0.815	0.314	5.18593e-77
CEP162	2.46411e-10	1.08566	0.047	0.01	5.09973e-06
ST6GALNAC3	2.54558e-11	1.08516	0.053	0.011	5.26834e-07
RXYLT1	4.44587e-24	1.08407	0.119	0.025	9.20116e-20
DPYSL2	1.23188e-82	1.08401	0.749	0.255	2.5495e-78
TSPAN31	3.03187e-35	1.08378	0.145	0.025	6.27475e-31
CCHCR1	3.90674e-07	1.08376	0.028	0.006	0.00808538
PSMB9	2.19921e-54	1.08363	0.64	0.244	4.55149e-50
MRPL35	2.5513e-29	1.0835	0.17	0.041	5.28016e-25
AK9	5.5572e-07	1.0831	0.034	0.008	0.0115012
IL21R	9.63255e-09	1.08266	0.053	0.015	0.000199355
POP7	7.27096e-55	1.0819	0.292	0.063	1.5048e-50
AIRN	1.99282e-06	1.08186	0.021	0.003	0.0412434
MAP3K13	3.44637e-50	1.08157	0.383	0.11	7.13261e-46
ACAD8	2.99225e-21	1.08101	0.091	0.017	6.19277e-17
TMSB10	3.42498e-175	1.08083	1	0.998	7.08833e-171
C6orf223	1.07363e-06	1.08082	0.026	0.005	0.0222199
ST7	4.32484e-17	1.08079	0.077	0.016	8.95069e-13
C1RL	1.79268e-33	1.07929	0.149	0.028	3.71012e-29
GNL3L	5.02595e-30	1.07907	0.153	0.033	1.04017e-25
TIMM21	1.03863e-06	1.07903	0.034	0.009	0.0214956
SLC33A1	1.2752e-12	1.07883	0.066	0.016	2.63915e-08
HDDC2	1.39274e-71	1.07831	0.44	0.105	2.88241e-67
BTN2A2	1.07626e-17	1.07815	0.087	0.019	2.22742e-13
RPN1	1.19137e-77	1.07811	0.651	0.205	2.46566e-73
PCYOX1	1.68239e-16	1.07767	0.091	0.022	3.48188e-12
TCTA	4.76722e-37	1.07716	0.204	0.046	9.86624e-33
FBXO22	9.46709e-27	1.07607	0.138	0.03	1.95931e-22
TMEM68	3.00264e-22	1.07568	0.087	0.015	6.21427e-18
F5	6.70512e-48	1.07535	0.258	0.057	1.38769e-43
TMEM102	4.54656e-14	1.07514	0.07	0.016	9.40956e-10
STAMBP	2.65489e-24	1.07511	0.111	0.022	5.49457e-20
STRADB	1.15552e-19	1.07395	0.113	0.028	2.39146e-15
ABI3	1.60362e-39	1.07376	0.264	0.069	3.31885e-35
MACF1	9.13276e-66	1.07298	0.526	0.156	1.89012e-61
MYO9A	9.40077e-24	1.07252	0.134	0.032	1.94558e-19
MPO	7.4188e-18	1.07238	0.072	0.013	1.5354e-13
AL138724.1	1.11651e-07	1.07193	0.036	0.008	0.00231074
MAP3K12	5.22979e-32	1.0713	0.166	0.036	1.08236e-27
MRTO4	8.10044e-30	1.07038	0.172	0.041	1.67647e-25
CHEK2	1.07972e-06	1.06994	0.026	0.005	0.0223459
TMEM209	2.57232e-22	1.06975	0.119	0.027	5.32367e-18
ACTL6A	1.88125e-20	1.06881	0.075	0.012	3.89344e-16
TBRG4	1.11108e-25	1.06855	0.119	0.023	2.29948e-21
ITGB5	1.47732e-07	1.06811	0.034	0.008	0.00305746
TNFAIP8L2	3.53192e-15	1.06774	0.074	0.016	7.30967e-11
ATXN7L1	5.95308e-17	1.06765	0.081	0.017	1.23205e-12
AGK	1.45901e-15	1.06722	0.089	0.022	3.01957e-11
CETP	9.64673e-10	1.06706	0.047	0.011	1.99649e-05
HIST1H2BD	3.14892e-14	1.06698	0.068	0.015	6.517e-10
TUBGCP4	8.11275e-15	1.06667	0.06	0.011	1.67902e-10
CD47	5.10825e-69	1.06612	0.745	0.277	1.0572e-64
ZBTB6	1.50583e-13	1.06584	0.062	0.013	3.11647e-09
PAQR3	2.65913e-16	1.06527	0.068	0.013	5.50333e-12
TMEM135	2.94029e-07	1.06526	0.034	0.008	0.00608521
RPL39L	5.14309e-08	1.06489	0.04	0.01	0.00106441
EZH2	5.39917e-28	1.06417	0.191	0.052	1.11741e-23
MT-ND5	1.81092e-104	1.06388	0.989	0.835	3.74789e-100
SCARB2	3.96966e-71	1.06358	0.494	0.13	8.21561e-67
GCLM	3.44183e-25	1.0626	0.13	0.029	7.12321e-21
RAB12	5.85947e-41	1.06158	0.194	0.038	1.21268e-36
CRIPT	1.26264e-39	1.06158	0.232	0.055	2.61316e-35
CBLB	2.56094e-13	1.06125	0.121	0.042	5.30012e-09
FAM207A	3.98308e-59	1.06021	0.319	0.069	8.24338e-55
PDHA1	2.41282e-38	1.05965	0.209	0.047	4.99357e-34
TMEM19	6.24599e-28	1.05877	0.149	0.033	1.29267e-23
NUDT22	8.11506e-70	1.05872	0.417	0.097	1.67949e-65
PSMD9	9.43201e-75	1.0584	0.498	0.127	1.95205e-70
TRAF5	3.20824e-20	1.05817	0.123	0.031	6.63977e-16
VARS	1.31535e-30	1.05677	0.162	0.036	2.72225e-26
TIPIN	9.82387e-07	1.05615	0.047	0.015	0.0203315
VCL	4.26976e-58	1.05545	0.434	0.122	8.8367e-54
MRPL58	6.71438e-38	1.0548	0.206	0.046	1.38961e-33
IL15	4.53974e-24	1.05374	0.196	0.061	9.39545e-20
KLHDC3	2.47531e-50	1.05371	0.27	0.059	5.12289e-46
ZMAT5	2.60714e-38	1.0537	0.194	0.041	5.39574e-34
RITA1	4.8143e-11	1.05313	0.057	0.013	9.96367e-07
SPCS2	4.63039e-80	1.05225	0.706	0.233	9.58305e-76
CCDC107	1.23032e-71	1.05207	0.387	0.083	2.54627e-67
PANX1	3.33252e-23	1.0517	0.104	0.02	6.89699e-19
GRHPR	3.20129e-73	1.05162	0.617	0.186	6.62539e-69
C14orf119	1.40031e-36	1.04914	0.142	0.023	2.89809e-32
NDUFA13	1.61764e-84	1.04908	0.906	0.407	3.34787e-80
YWHAH	2.37632e-67	1.0486	0.619	0.206	4.91804e-63
ADAM10	7.34242e-66	1.04845	0.621	0.209	1.51959e-61
CSF1R	4.81347e-51	1.04745	0.347	0.091	9.96196e-47
RETSAT	5.61719e-10	1.0472	0.042	0.008	1.16253e-05
ZDHHC24	3.46129e-44	1.04655	0.289	0.074	7.16349e-40
AACS	6.03322e-17	1.04622	0.066	0.011	1.24863e-12
RUVBL2	4.43467e-34	1.04599	0.181	0.04	9.17798e-30
PYCARD	4.15984e-65	1.04584	0.853	0.507	8.6092e-61
COPG1	5.10554e-48	1.04583	0.275	0.063	1.05664e-43
MLEC	2.56857e-59	1.0458	0.434	0.121	5.31591e-55
SLC39A3	1.22892e-37	1.04571	0.228	0.055	2.54337e-33
IGFLR1	5.33315e-42	1.04487	0.225	0.049	1.10375e-37
XYLT2	1.07969e-09	1.04457	0.036	0.006	2.23453e-05
MAP2K4	3.1943e-24	1.04454	0.123	0.026	6.61092e-20
TFEC	5.2356e-51	1.04403	0.274	0.06	1.08356e-46
KIAA0930	6.05287e-76	1.04364	0.606	0.178	1.2527e-71
GPR162	1.64577e-10	1.04315	0.045	0.009	3.40608e-06
SLC25A24	2.59193e-84	1.0426	0.655	0.192	5.36425e-80
MZT2B	1.80824e-76	1.04219	0.942	0.481	3.74233e-72
PSMD4	5.19118e-76	1.04126	0.694	0.23	1.07437e-71
PSMB8	5.86897e-62	1.04121	0.836	0.385	1.21464e-57
IDE	9.19581e-31	1.04098	0.123	0.021	1.90317e-26
MTCH2	5.89378e-75	1.04071	0.498	0.127	1.21978e-70
SCCPDH	6.91561e-49	1.04007	0.285	0.067	1.43126e-44
FBXO9	8.14913e-72	1.0399	0.468	0.119	1.68654e-67
C2CD3	1.37296e-09	1.03953	0.045	0.01	2.84148e-05
CCDC22	1.18702e-42	1.03943	0.213	0.043	2.45666e-38
NF1	1.1483e-38	1.03835	0.238	0.059	2.37653e-34
EEF2KMT	1.45627e-07	1.0381	0.034	0.008	0.0030139
COX20	4.01002e-73	1.03692	0.596	0.178	8.29913e-69
IDNK	6.67788e-19	1.03666	0.108	0.026	1.38205e-14
FBH1	4.74732e-28	1.03655	0.147	0.032	9.82504e-24
TUBA1B	4.68967e-53	1.03639	0.938	0.633	9.70574e-49
NDUFB1	1.73044e-78	1.03556	0.906	0.453	3.58132e-74
SLC39A4	1.87604e-56	1.03552	0.291	0.061	3.88265e-52
THEM4	2.83688e-11	1.03522	0.07	0.019	5.8712e-07
BZW2	7.99944e-49	1.03514	0.336	0.089	1.65556e-44
C1orf53	3.14356e-08	1.03392	0.045	0.012	0.000650591
SERPINB1	1.07978e-85	1.03389	0.981	0.685	2.23471e-81
ACADS	2.36044e-28	1.0328	0.132	0.026	4.88516e-24
MESP1	1.31776e-07	1.03247	0.03	0.006	0.00272724
ZNF816-ZNF321P	5.70859e-09	1.03241	0.036	0.007	0.000118145
WDR36	4.06768e-18	1.03237	0.1	0.024	8.41847e-14
PLEKHA8	5.78438e-13	1.03218	0.058	0.012	1.19714e-08
ATPAF2	7.36507e-38	1.03196	0.206	0.046	1.52427e-33
ABCB8	3.26455e-24	1.03188	0.109	0.021	6.75631e-20
ALG6	1.87731e-12	1.03154	0.047	0.008	3.88529e-08
SYNJ2BP	7.29206e-17	1.03126	0.079	0.016	1.50917e-12
MRPL41	2.17148e-85	1.03028	0.762	0.252	4.49409e-81
ATG4A	1.34649e-15	1.02936	0.075	0.016	2.78671e-11
NUDT5	3.1437e-49	1.02844	0.325	0.083	6.50621e-45
CGAS	3.08207e-34	1.02662	0.223	0.057	6.37865e-30
PLEKHM3	1.22099e-26	1.02607	0.125	0.025	2.52697e-22
EIF2S1	1.39367e-42	1.02539	0.251	0.06	2.88435e-38
UBA3	4.81826e-46	1.02537	0.236	0.049	9.97188e-42
NARS	4.46116e-43	1.02527	0.336	0.099	9.23281e-39
AC087645.2	7.68189e-08	1.02516	0.034	0.007	0.00158984
CCDC90B	1.29379e-49	1.02403	0.277	0.062	2.67763e-45
PPIE	1.52569e-40	1.02368	0.219	0.048	3.15757e-36
BTRC	1.67156e-06	1.02322	0.028	0.006	0.0345945
KLHL12	4.49725e-24	1.02306	0.119	0.025	9.30751e-20
MRPS5	2.38129e-59	1.02296	0.421	0.114	4.92832e-55
MAGED2	1.09455e-32	1.02289	0.194	0.047	2.26529e-28
SMC6	1.13047e-23	1.022	0.13	0.03	2.33961e-19
UPF3B	1.77411e-17	1.02187	0.108	0.028	3.67171e-13
CYB5B	4.3317e-35	1.02154	0.185	0.04	8.96489e-31
FMC1	5.28635e-29	1.02134	0.143	0.03	1.09406e-24
TOMM34	4.92902e-13	1.02121	0.094	0.028	1.02011e-08
CHMP4A	4.43673e-74	1.02011	0.613	0.186	9.18227e-70
INSIG2	1.30931e-21	1.02011	0.109	0.024	2.70974e-17
TMEM184C	5.10442e-11	1.0198	0.053	0.012	1.05641e-06
HNRNPLL	9.83065e-28	1.01909	0.175	0.045	2.03455e-23
MAVS	6.34221e-34	1.01875	0.183	0.041	1.31258e-29
PMM2	2.4464e-31	1.01855	0.151	0.03	5.06306e-27
HIGD1A	6.35334e-69	1.01755	0.491	0.131	1.31489e-64
[truncated: 5,357 more rows]

## Sheet: ISG marker
Supplementary Material 2
Gene
ADA2
CALHM6
CD74
CNDP2
CSF1R
HES4
HLA-DMA
HLA-DPA1
HLA-DPB1
HLA-DRB1
HLA-DRB5
IFI35
IFIT2
IRF7
MYOF
OAS1
OAS3
SCIMP
ST3GAL5
TCN2
TIMM10
ZNF703
IFITM3
TYMP
CDKN1C
MT2A
LGALS9
VAMP5
PSME2
