# Supplementary material
Source: Research Square preprint supplement (doi:10.21203/rs.3.rs-9906083/v1)
Supplement: Supplementary file 1 [file 70622d08c9f9fd03e04c001c.pdf]

## Extended Data Fig. 1

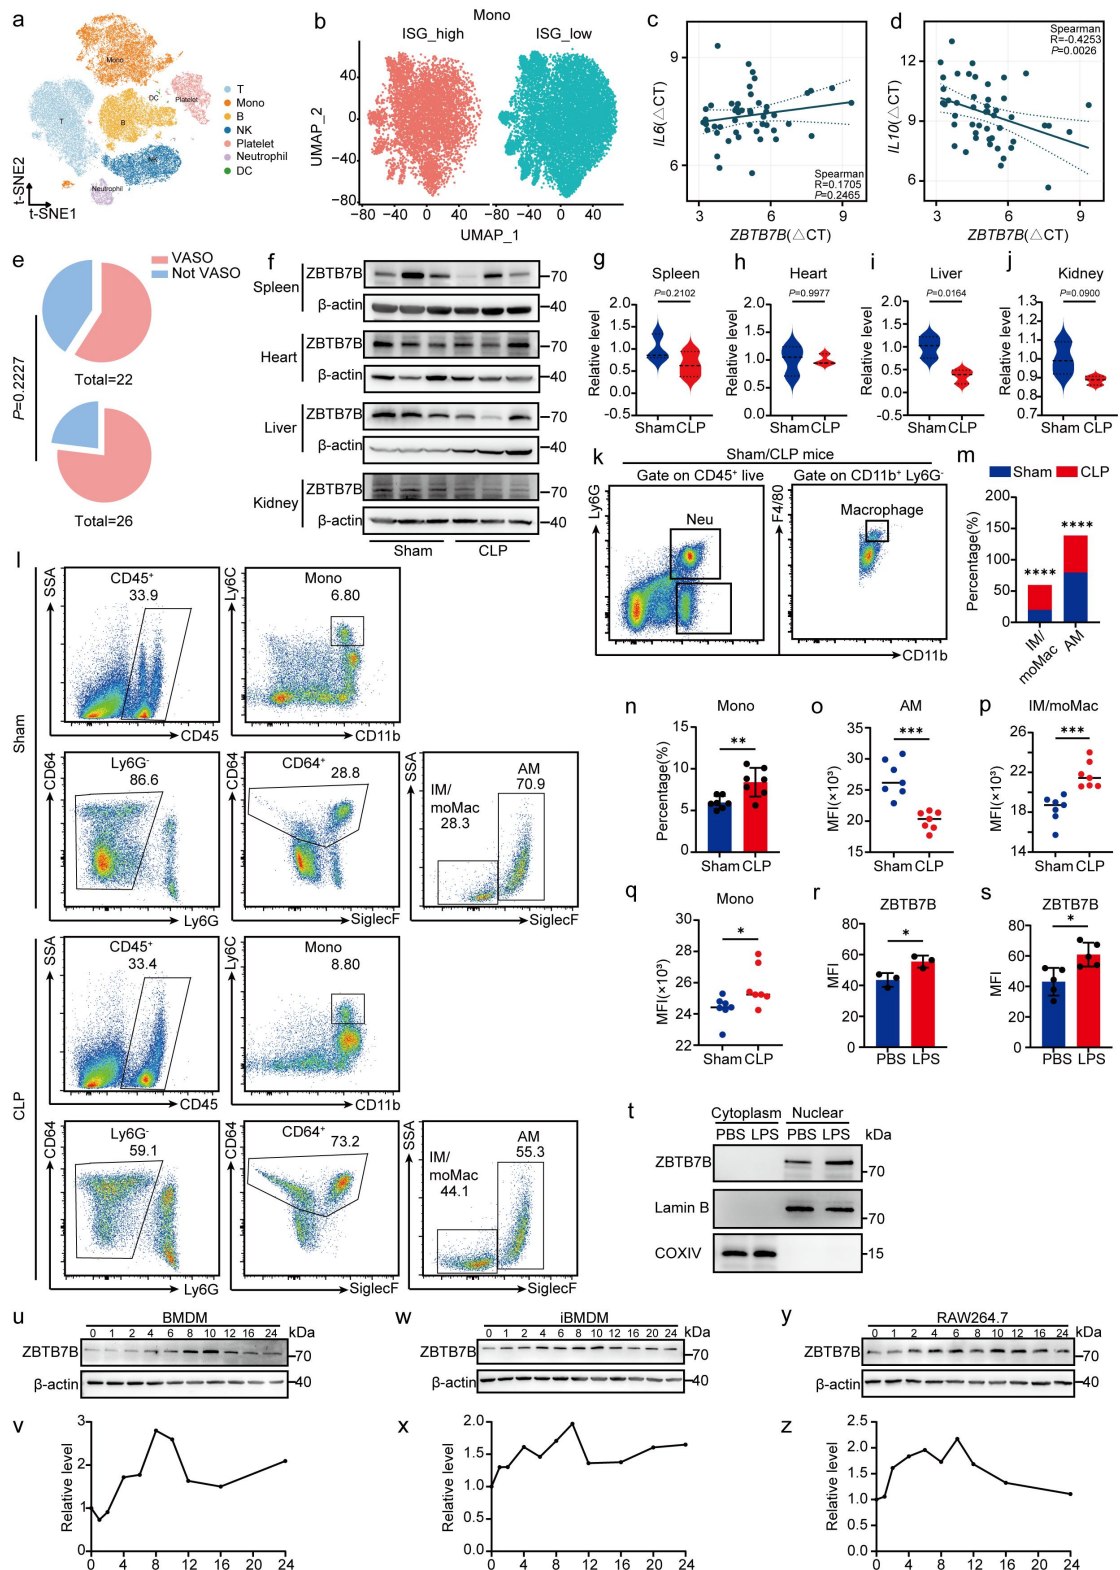

**Extended Data Fig. 1 | ZBTB7B expression in monocytes/macrophages correlates with sepsis severity.** **a**, t-SNE plot of single-cell transcriptomic profiles of PBMCs from healthy controls and sepsis patients. Cells are colored by annotated cell type. Each dot represents one cell. **b**, UMAP plot of monocytes showing two

subpopulations defined by ISG expression levels. **c, d**, Correlation of *ZBTB7B* with *IL6* and *IL10* mRNA level in peripheral blood CD14<sup>+</sup> monocytes of patients with septic ARDS ( $n = 48$ ). **e**, Proportion of patients requiring vasopressor usage segmented by the median of *ZBTB7B* mRNA level in patients with septic ARDS ( $n = 24$  per group). **f–j**, Immunoblotting and quantification of *ZBTB7B* expression in spleen, heart, liver or kidney from mice subjected to CLP or Sham ( $n = 3$  per group). **k**, Flow cytometric gating strategy for the identification of pulmonary F4/80<sup>+</sup> macrophages from mice. **l**, Flow cytometric gating strategy for alveolar macrophages (AMs), interstitial macrophages (IMs)/monocyte-derived macrophages (moMacs) and monocytes of lung tissue from mice subjected to CLP or Sham. **m, n**, Quantification of the percentages of AMs, IMs/moMacs or monocytes in lung tissue from mice subjected to CLP or Sham ( $n = 7$  per group). **o–q**, Mean fluorescence intensity (MFI) of *ZBTB7B* in AMs, IMs/moMacs or monocytes in lung tissue from mice subjected to CLP or Sham ( $n = 7$  per group). **r**, Quantification of MFI of *ZBTB7B* from three randomly selected immunofluorescence images in PBS or LPS-stimulated (200 ng/mL) BMDMs ( $n = 3$  images per group). **s**, Quantification of MFI of *ZBTB7B* in five randomly selected regions of interest (ROIs) from one representative immunofluorescence image in PBS or LPS-stimulated BMDMs. **t**, Immunoblot analysis of *ZBTB7B* level and location in PBS or LPS-stimulated BMDMs. **u–z**, Immunoblot analysis and quantification of *ZBTB7B* expression at indicated time points post-stimulation of LPS in BMDMs, immortalized BMDMs or RAW264.7 cells. *P* values were calculated by Spearman's correlation analysis (**c, d**), a two-sided Fisher's exact test (**e**) and unpaired two-tailed Student's *t*-test (**g–j, m–s**). \*,  $P < 0.05$ ; \*\*,  $P < 0.01$ ; \*\*\*,  $P < 0.001$ ; \*\*\*\*,  $P < 0.0001$ ; ns = not significant. Data are shown as mean  $\pm$  SD.

## Extended Data Fig.2

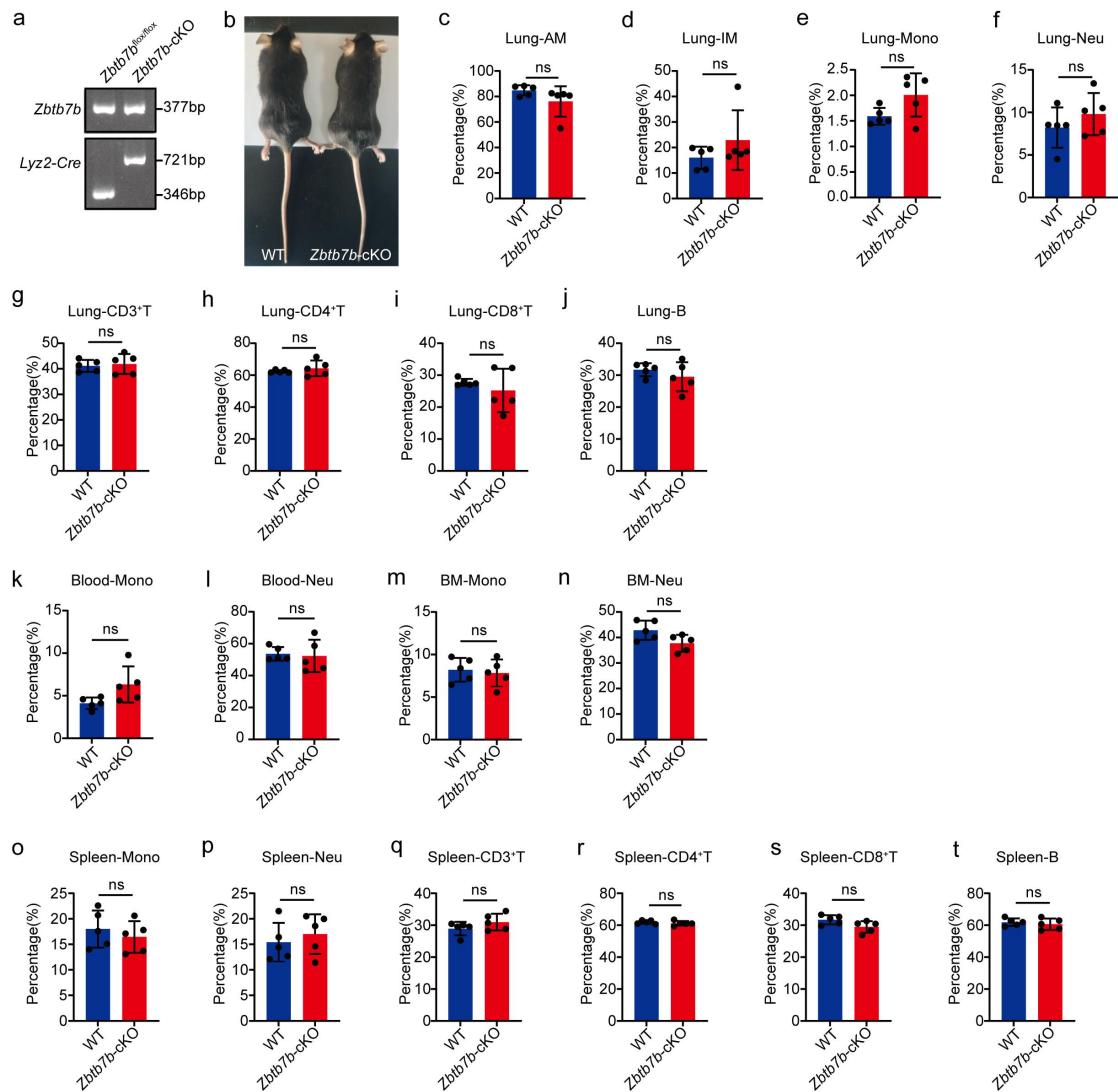

**Extended Data Fig. 2 | Generation and Baseline Characterization of Myeloid cell-specific *Zbtb7b* deficiency mice.** **a**, Genotype analysis of *Zbtb7b*<sup>lox/lox</sup> (WT) and *Zbtb7b*<sup>lox/lox</sup>*Lyz2-Cre* (*Zbtb7b*-cKO) mice by PCR. **b**, Gross phenotype of WT and *Zbtb7b*-cKO mice. **c–j**, Flow cytometric quantification of the percentages of AMs (**c**), IMs (**d**), monocytes (**e**), neutrophils (**f**), T cells (**g–i**) and B cells (**j**) in the lung tissues of WT and *Zbtb7b*-cKO mice ( $n = 5$  per group). **k, l**, Flow cytometric quantification of the percentages of monocytes and neutrophils in peripheral blood of WT and *Zbtb7b*-cKO mice ( $n = 5$  per group). **m, n**, Flow cytometric quantification of the percentages of monocytes and neutrophils in bone marrows of WT and *Zbtb7b*-cKO mice ( $n = 5$  per group). **o–t**, Flow cytometric quantification of the percentages of monocytes (**o**), neutrophils (**p**), T cells (**q–s**) or B cells (**t**) in spleen tissues of WT and

*Zbtb7b*-cKO mice ( $n = 5$  per group).  $P$  values were calculated by unpaired two-tailed Student's  $t$ -test. ns = not significant. Data are shown as mean  $\pm$  SD.

### Extended Data Fig.3

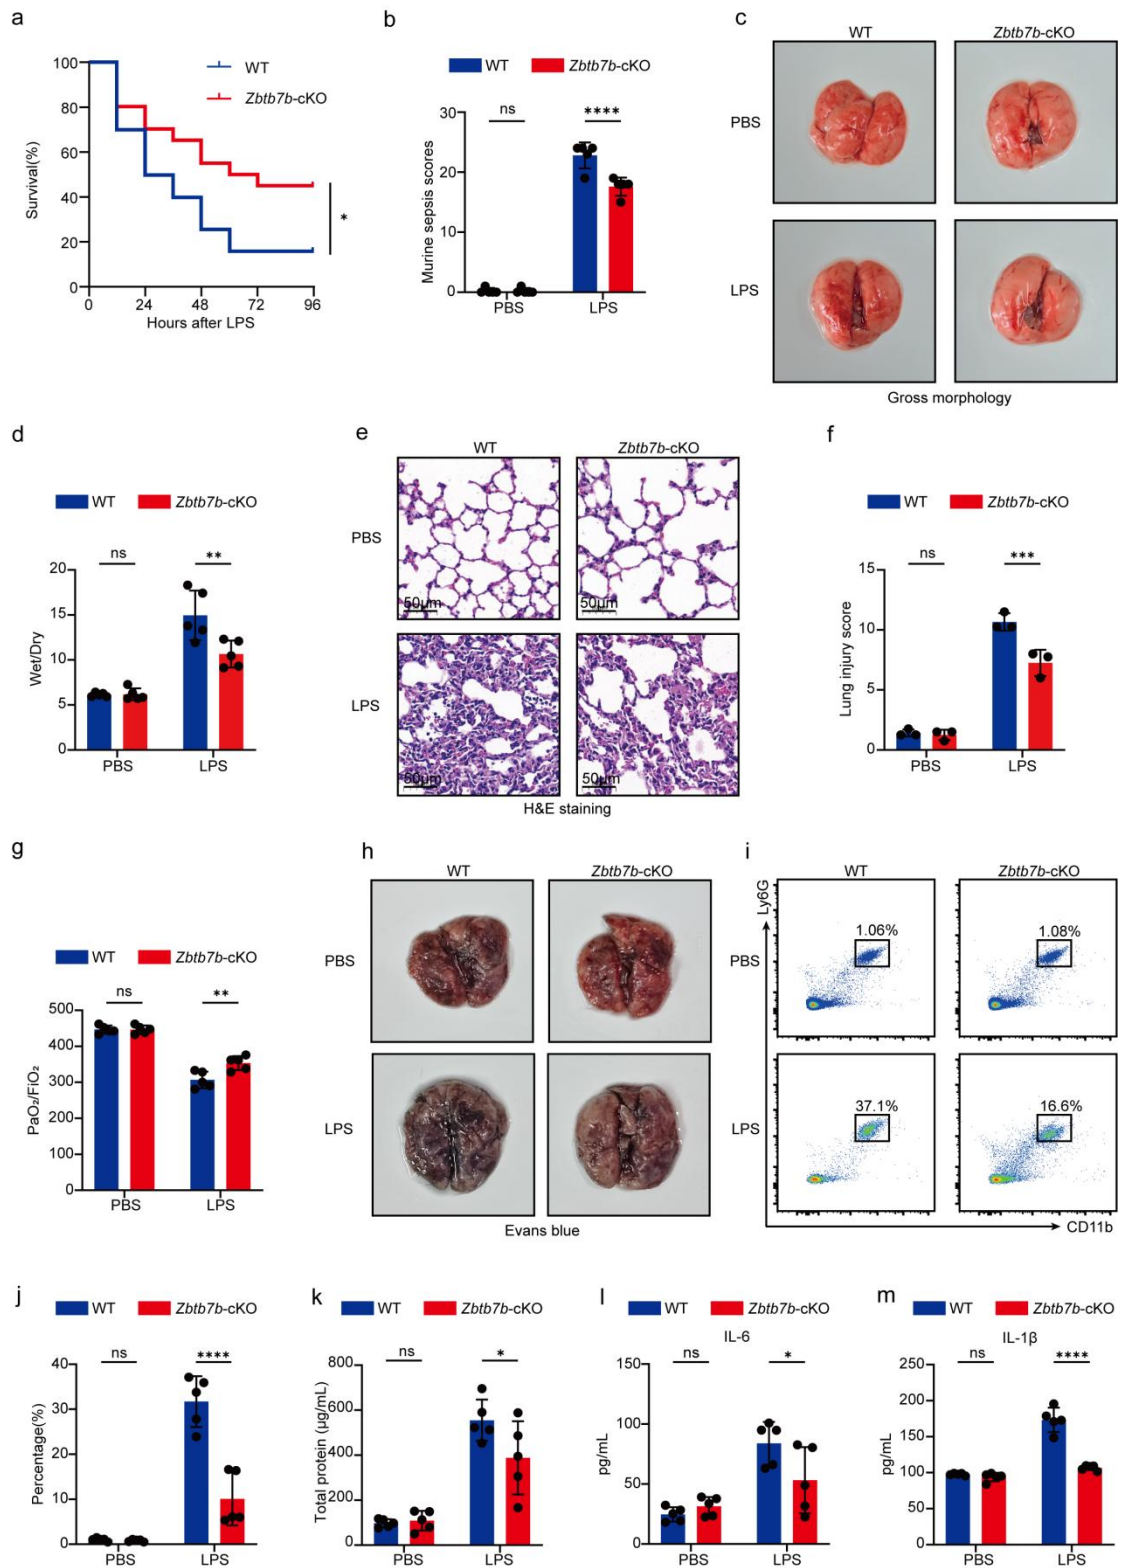

**Extended Data Fig. 3 | Myeloid cell-specific *Zbtb7b* deficiency attenuates septic ALI.** a–m, WT or *Zbtb7b*-cKO mice were intraperitoneally (i.p.) injected with lipopolysaccharide (LPS, 10 mg/kg, 12 hrs). **a**, The survival rates ( $n = 20$  per group). **b**, The murine sepsis scores ( $n = 5$  per group). **c**, Gross morphology of lung tissue. **d**,

Lung W/D ratio analysis ( $n = 5$  per group). **e, f**, Representative images (**e**) and lung injury scores (**f**) of H&E staining of lung tissues (Scale bar, 50  $\mu\text{m}$ ). **g**, Arterial blood  $\text{PaO}_2/\text{FiO}_2$  ( $n = 5$  per group). **h**, Evans blue dye leakage of lung tissue. **i, j**, Representative images (**i**) and quantification (**j**) of the percentages of neutrophils in BALFs ( $n = 5$  per group). **k–m**, Concentration of total protein (**k**), IL-6(**l**) and IL-1 $\beta$  (**m**) in BALFs ( $n = 5$  per group).  $P$  values were calculated by Kaplan-Meier analysis (**a**) and two-way ANOVA followed by Fisher's LSD post hoc test (**b, d, f, g, j–m**). \*,  $P < 0.05$ ; \*\*,  $P < 0.01$ ; \*\*\*\*,  $P < 0.0001$ ; ns = not significant. Data are shown as mean  $\pm$  SD.

## Extended Data Fig.4

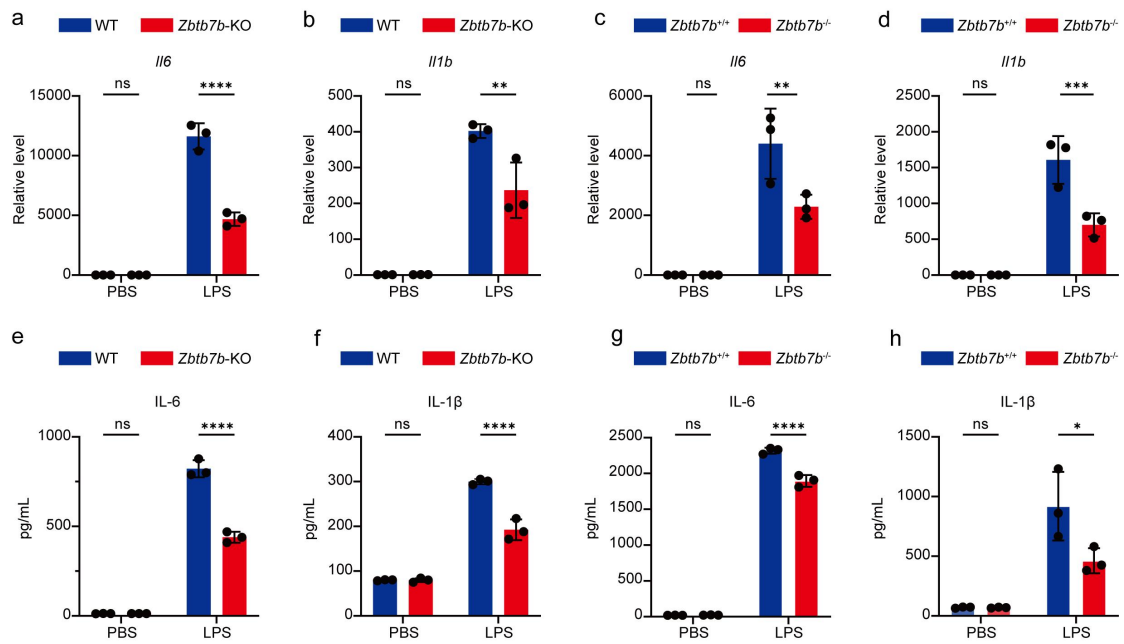

**Extended Data Fig. 4 | *Zbtb7b* deficiency attenuates inflammatory responses in macrophages after LPS stimulation. a, b,** qPCR analysis of *Il6* (a) and *Il1b* (b) mRNA levels in WT or *Zbtb7b*-KO BMDMs treated with PBS or LPS (200 ng/mL). **c, d,** qPCR analysis of *Il6* (c) or *Il1b* (d) mRNA levels in *Zbtb7b*<sup>+/+</sup> or *Zbtb7b*<sup>-/-</sup> iBMDMs treated with PBS or LPS (200 ng/mL). **e, f,** ELISA of IL-6 (e) or IL-1β (f) release by WT or *Zbtb7b*-KO BMDMs treated with PBS or LPS (200 ng/mL). **g, h,** ELISA of IL-6 (g) or IL-1β (h) release by *Zbtb7b*<sup>+/+</sup> or *Zbtb7b*<sup>-/-</sup> iBMDMs treated with PBS or LPS (200 ng/mL). *P* values were calculated by two-way ANOVA followed by Fisher's LSD post hoc test (a–h). \*, *P* < 0.05; \*\*, *P* < 0.01; \*\*\*, *P* < 0.001; \*\*\*\*, *P* < 0.0001; ns = not significant. Data are shown as mean ± SD.

Extended Data Fig.5

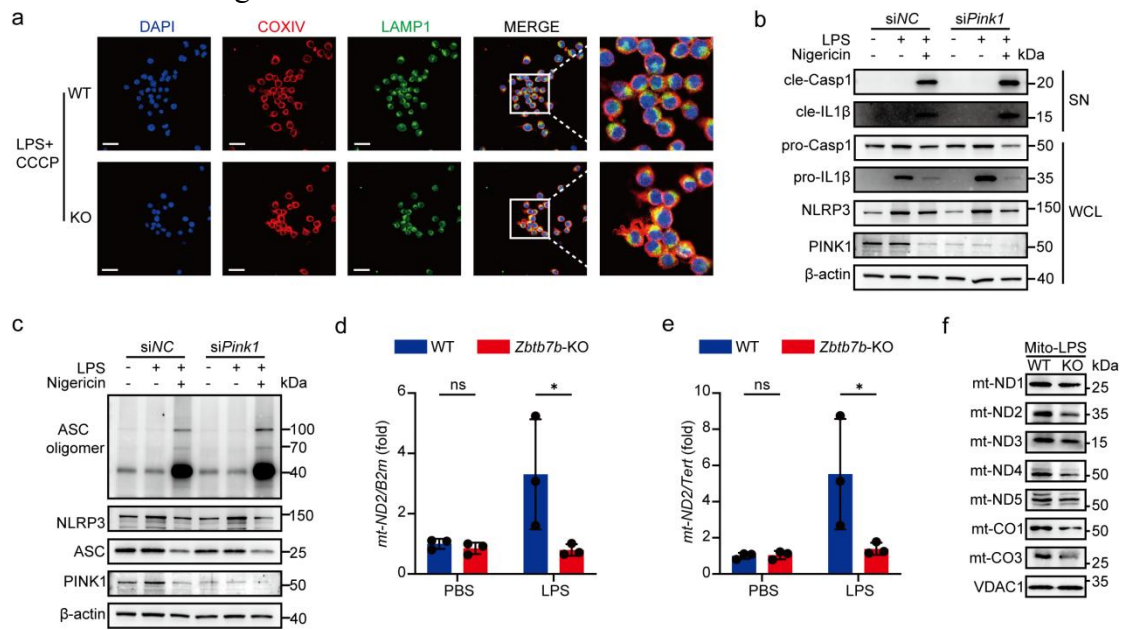

**Extended Data Fig. 5 | ZBTB7B-induced CMPK2 promotes NLRP3 inflammasome activation through suppressing mitophagy.** **a**, Representative immunofluorescence images of *Zbtb7b*<sup>+/+</sup> (WT) or *Zbtb7b*<sup>-/-</sup> (KO) iBMDMs co-stained for COXIV, LAMP1 and DAPI following stimulation with LPS and CCCP (Scale bar, 30  $\mu$ m). **b**, **c**, Immunoblot analysis of SN and WCL(**b**), and ASC oligomerization in pellets(**c**) from *Zbtb7b*<sup>-/-</sup> (KO) iBMDMs transfected with scramble sequence (si-NC) or specific sequences targeting *Pink1* (si-*Pink1*) following stimulation with LPS and nigericin. **d**, **e**, Relative total mtDNA content in WT and *Zbtb7b*-KO BMDMs, pre- and post- LPS priming. **f**, Immunoblot analysis of mitochondrial protein in *Zbtb7b*<sup>+/+</sup> (WT) or *Zbtb7b*<sup>-/-</sup> (KO) iBMDMs following LPS stimulation. *P* values were calculated by two-way ANOVA followed by Fisher's LSD post hoc test. \*, *P* < 0.05; ns = not significant. Data are shown as mean  $\pm$  SD.

Extended Data Fig.6

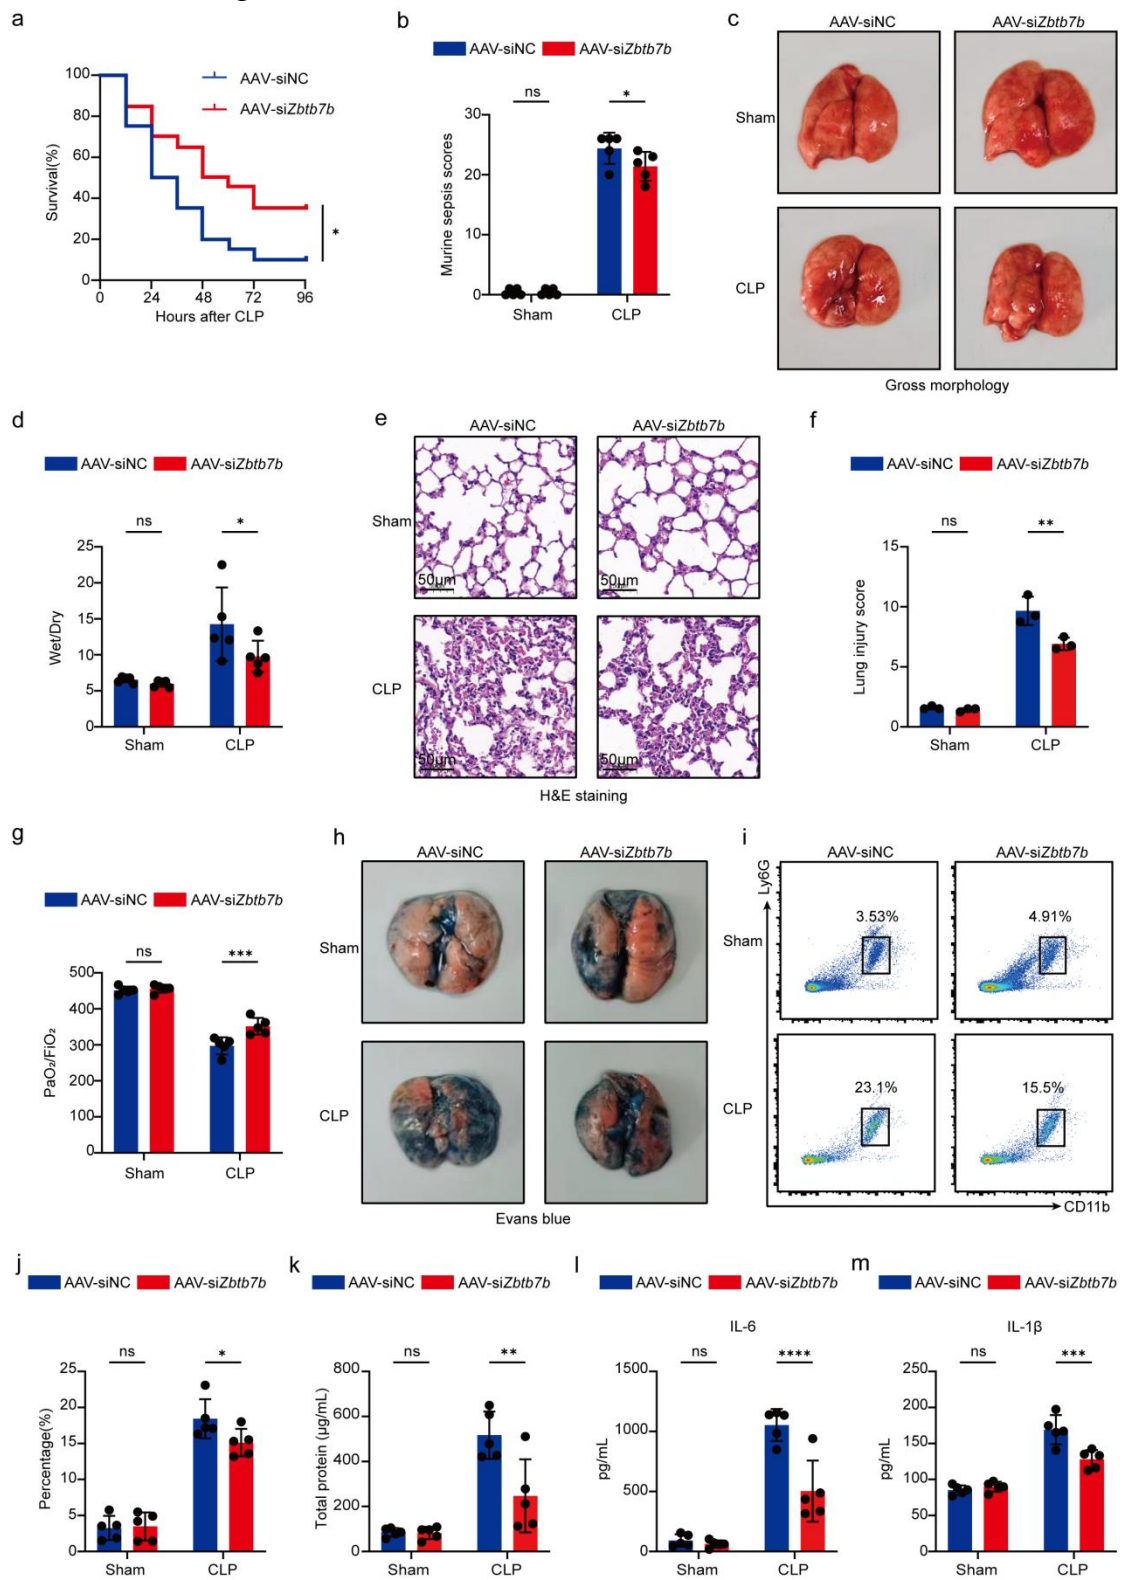

**Extended Data Fig. 6 | Inhibition of ZBTB7B suppresses systemic inflammation and protects against lung injury after sepsis. a–m, WT mice were intratracheal injected AAV-siNC or AAV-siZbtb7b 7 days before CLP. a, The survival rates ( $n = 20$  per group). b, The murine sepsis scores ( $n = 5$  per group). c, Gross morphology of**

lung tissue. **d**, Lung W/D ratio ( $n = 5$  per group). **e, f**, Representative images (**e**) and lung injury score (**f**) of H&E staining of lung tissues (Scale bar, 50  $\mu\text{m}$ ). **g**, Arterial blood  $\text{PaO}_2/\text{FiO}_2$  ( $n = 5$  per group). **h**, Evans blue dye leakage of lung tissue. **i, j**, Representative images (**i**) and quantification (**j**) of the percentages of neutrophils in BALFs ( $n = 5$  per group). **k–m**, Concentration of total protein (**k**), IL-6 (**l**) and IL-1 $\beta$  (**m**) in BALFs ( $n = 5$  per group).  $P$  values were calculated by Kaplan-Meier analysis (**a**) and two-way ANOVA with Fisher's LSD post hoc analysis (**b, d, f, g, j–m**). \*,  $P < 0.05$ ; \*\*,  $P < 0.01$ ; \*\*\*,  $P < 0.001$ ; \*\*\*\*,  $P < 0.0001$ ; ns = not significant. Data are shown as mean  $\pm$  SD.

**Extended Data Table 1 | Baseline Characteristics of Study Groups in the Validation Cohort.**

| Baseline Characteristics                 | Sepsis without ARDS patients | septic ARDS patients | healthy control | P value in first two group | P value in all groups |
|------------------------------------------|------------------------------|----------------------|-----------------|----------------------------|-----------------------|
|                                          | Group 1(n = 55)              | Group 2(n=48)        | Group 3(n = 20) |                            |                       |
| Male sex(%)                              | 32(58.18%)                   | 26(54.17%)           | 9(45%)          | 0.6819                     | 0.5973                |
| Age(years)                               | 70(65,75)                    | 72.5(67,77)          | 72.5(68,78)     | 0.198                      | 0.294                 |
| <b>Comorbidities[n](%)</b>               |                              |                      |                 |                            |                       |
| Chronic Pulmonary Disease                | 13(23.6%)                    | 9(18.75%)            | NA              | -                          | -                     |
| Chronic Kidney Disease                   | 11(20.00%)                   | 8(16.70%)            | NA              | -                          | -                     |
| Cardio-cerebrovascular                   | 21(38.18%)                   | 26(54.17%)           | NA              | -                          | -                     |
| Diabetes                                 | 25(45.46%)                   | 28(58.33%)           | NA              | -                          | -                     |
| Hypertension                             | 38(69.10%)                   | 36(75.00%)           | NA              | -                          | -                     |
| <b>Focus of infection[n](%)</b>          |                              |                      |                 |                            |                       |
| Gastrointestinal                         | 13(23.64%)                   | 16(33.33%)           | NA              | -                          | -                     |
| Pulmonary                                | 20(36.36%)                   | 19(39.58%)           | NA              | -                          | -                     |
| Urinary tract                            | 16(29.09%)                   | 7(14.58%)            | NA              | -                          | -                     |
| Skin or soft tissue                      | 6(10.91%)                    | 6(12.50%)            | NA              | -                          | -                     |
| <b>Distribution of pathogens[n](%)</b>   |                              |                      |                 |                            |                       |
| Gram positive                            | 20(36.36%)                   | 12(25.00%)           | NA              | -                          | -                     |
| Gram negative                            | 19(34.55%)                   | 19(39.58%)           | NA              | -                          | -                     |
| Fungus                                   | 4(7.27%)                     | 5(10.42%)            | NA              | -                          | -                     |
| Miscellaneous                            | 7(12.73%)                    | 9(18.75%)            | NA              | -                          | -                     |
| Unclear                                  | 5(9.09%)                     | 3(6.25%)             | NA              | -                          | -                     |
| WBC, 10 <sup>9</sup> /L                  | 13.19(8.98,17.60)            | 17.00(12.74,20.96)   | 6.19(4.73,7.66) | <b>0.0061</b>              | <.0001                |
| CRP,mg/L                                 | 95.14(48.06,148.6)           | 126.7(68.25,166.6)   | 4.75(2.25,6.88) | 0.08                       | <.0001                |
| Procalcitonin,ng/mL                      | 3.73(0.90,10.50)             | 6.15(2.15,36.28)     | 0.03(0.02,0.04) | 0.063                      | <.0001                |
| IL-6,pg/mL                               | 70.31(25.50,201.6)           | 120.50(52.39,339.1)  | 3.00(1.83,4.68) | 0.094                      | <.0001                |
| Lactate,mmol/L                           | 1.60(1.20,2.60)              | 2.05(1.33,3.65)      | 0.50(0.20,0.70) | 0.083                      | <.0001                |
| Vasopressor use(%)                       | 18(32.73%)                   | 33(68.75%)           | NA              | <b>&lt;.001</b>            | -                     |
| Mechanical Ventilation(%)                | 8(14.55%)                    | 40(83.33%)           | NA              | <b>&lt;.0001</b>           | -                     |
| PaO <sub>2</sub> /FiO <sub>2</sub> ,mmHg | 375(342,422)                 | 191(137,221)         | NA              | <b>&lt;.0001</b>           | -                     |
| SOFA                                     | 5(3,6)                       | 8(6,10)              | NA              | <b>&lt;.0001</b>           | -                     |
| APACHEII                                 | 14(11,18)                    | 18(13,22)            | NA              | <b>0.006</b>               | -                     |
| Length of Hospital stay(days)            | 15(12,19)                    | 12(8,18)             | NA              | 0.089                      | -                     |
| Length of ICU stay(days)                 | 5(3,9)                       | 8(5,12)              | NA              | <b>0.017</b>               | -                     |

Footnotes:Continuous variables are presented as median (interquartile range), and categorical variables as n (%). Comparisons between groups were performed using the Mann-Whitney U test for non-normally distributed continuous variables, Student's t-test for normally distributed variables, and  $\chi^2$  or Fisher's exact test for categorical variables. One-way ANOVA was used for comparisons across all groups. P values < 0.05 were considered statistically significant. Focus of infection and pathogen distribution are reported only for infected groups (Group 1, 2). Mechanical ventilation was defined as ongoing invasive ventilatory support at the time of study enrollment. SOFA scores were calculated 24 hours after admission.

Abbreviations: NA, not applicable; WBC, white blood cell count; CRP, C-reactive protein; IL-6, interleukin-6; PaO<sub>2</sub>/FiO<sub>2</sub>, partial pressure of oxygen to fraction of inspired oxygen ratio; APACHE II, Acute Physiology and Chronic Health Evaluation II; SOFA, Sequential Organ Failure Assessment; ICU, intensive care unit.

**Extended Data Table 2** Reagents used in this study.

| <b>Reagent</b>                                               | <b>Source</b>             | <b>Catalog number</b> |
|--------------------------------------------------------------|---------------------------|-----------------------|
| Protease inhibitor cocktail                                  | ABclonal                  | RM02916               |
| Sonication ChIP Kit                                          | ABclonal                  | RK20258               |
| Mouse IL-6 ELISA Kit                                         | ABclonal                  | RK00008               |
| Evo M-MLV RT Premix                                          | Accurate Biology          | AG11706               |
| SYBR Green Premix Pro Taq HS qPCR Kit                        | Accurate Biology          | AG11701               |
| Phenylmethylsulfonyl fluoride (PMSF)                         | Beyotime                  | ST506                 |
| Enhanced ATP Assay Kit                                       | Beyotime                  | S0027                 |
| BeyoMag™ Protein A+G Magnetic Beads                          | Beyotime                  | P2108                 |
| Cell Lysis Buffer                                            | Cell Signaling Technology | 9803                  |
| Ficoll-Paque solution                                        | Cytiva                    | 17544602              |
| Omni-ECL™ Femto Light Chemiluminescence Kit                  | Epizyme                   | SQ201                 |
| Omni-Easy™ Ready-to-use BCA Protein Assay Kit                | Epizyme                   | ZJ102                 |
| TRIzol                                                       | Thermo Fisher Scientific  | 15596018              |
| MitoProbe™ TMRM                                              | Thermo Fisher Scientific  | M20036                |
| Mouse IL-1 beta Uncoated ELISA Kit                           | Thermo Fisher Scientific  | BMS6002-2TEN          |
| eBioscience Foxp3 / Transcription Factor Staining Buffer Set | Thermo Fisher Scientific  | 00-5523-00            |
| OPTI-MEM(TM) I (1X)                                          | Thermo Fisher Scientific  | 3248487               |
| Mitochondria Isolation Kit for Cultured Cells                | Thermo Fisher Scientific  | 89874                 |
| Lipofectamine™ RNAiMAX Transfection Reagent                  | Thermo Fisher Scientific  | 13778100              |
| Evans blue                                                   | Merck                     | E2129                 |
| Lung Dissociation Kit                                        | Miltenyi Biotec           | 130-095-0927          |
| CD14 MicroBeads, human                                       | Miltenyi Biotec           | 130-050-201           |
| Anti-F4/80 MicroBeads UltraPure, mouse                       | Miltenyi Biotec           | 130-110-443           |
| Murine macrophage colony-stimulating factor (M-CSF)          | PeptoTech                 | 315-02                |
| 5X Protein Loading Dye                                       | Sangon Biotech            | C508320               |
| Lipopolysaccharides                                          | Sigma-Aldrich             | L2630                 |
| FastPure Cell/Tissue DNA Isolation Mini Kit                  | Vazyme                    | DC102                 |
| CytoTox 96 <sup>®</sup> Non-Radioactive Cytotoxicity Assay   | Promega                   | G1780                 |
| jetPRIME transfection reagent                                | Polyplus                  | 101000046             |

**Extended Data Table 3** Antibodies used in this study

| Antibody                                            | Source                    | Catalog number   |
|-----------------------------------------------------|---------------------------|------------------|
| ThPOK (D9V5T) Rabbit Monoclonal Antibody            | Cell Signaling Technology | 13205            |
| $\beta$ -Actin (13E5) Rabbit mAb                    | Cell Signaling Technology | 4970             |
| Lamin B1 (D9V6H) Rabbit mAb                         | Cell Signaling Technology | 13435            |
| COX IV(3E11) Rabbit mAb                             | Cell Signaling Technology | 4850             |
| <u>LC3B Antibody</u>                                | Cell Signaling Technology | 2775             |
| ASC/TMS1 (D2W8U) Rabbit Monoclonal Antibody         | Cell Signaling Technology | 67824            |
| Tom20 (D8T4N) Rabbit Monoclonal Antibody            | Cell Signaling Technology | 42406            |
| <u>Stat1 Antibody</u>                               | Cell Signaling Technology | 9172             |
| MT-ND1 Rabbit mAb                                   | ABclonal                  | A9743            |
| MT-ND2 Rabbit pAb                                   | ABclonal                  | A17968           |
| MT-ND3 Rabbit pAb                                   | ABclonal                  | A17969           |
| MT-ND4 Rabbit pAb                                   | ABclonal                  | A17970           |
| MT-ND5 Rabbit pAb                                   | ABclonal                  | A8135            |
| MT-CO1 Rabbit pAb                                   | ABclonal                  | A17889           |
| MT-CO3 Rabbit pAb                                   | ABclonal                  | A9939            |
| VDAC1 Rabbit mAb                                    | ABclonal                  | A19707           |
| KIF5B Rabbit mAb                                    | ABclonal                  | A20928           |
| DRP1 Rabbit mAb                                     | ABclonal                  | A21968           |
| <u>Mitofusin-1/MFN1 Rabbit mAb</u>                  | ABclonal                  | A21293           |
| <u>Mitofusin 2 Rabbit mAb</u>                       | ABclonal                  | A19678           |
| <u>LAMP1/CD107a Rabbit mAb</u>                      | ABclonal                  | A23947           |
| DDDDK/Flag                                          | ABclonal                  | AE005            |
| Myc-Tag Rabbit mAb                                  | ABclonal                  | AE070            |
| anti-ASC antibody                                   | Santa Cruz                | sc-514414        |
| THPOK Antibody(A-4)                                 | Santa Cruz                | sc-376250        |
| <u>anti-NLRP3/NALP3, mAb (Cryo-2)</u>               | AdipoGen Life Science     | AG-20B-0014-C100 |
| <u>anti-Caspase-1 (p20) (mouse), mAb (Casper-1)</u> | AdipoGen Life Science     | AG-20B-0042      |
| Mouse IL-1 beta /IL-1F2 Antibody                    | R&D Systems               | AF-401-NA        |
| Anti-CMPK2 Antibody                                 | Abcam                     | ab194567         |
| Stat1 Antibody [J19A4]                              | <u>Selleckchem.com</u>    | F0263            |
| Parkin Antibody [H15P18]                            | <u>Selleckchem.com</u>    | F0296            |
| PINK1 Antibody                                      | Affinity Biosciences      | AB_2841209       |
| COXIV Monoclonal antibody                           | Proteintech               | 66110-1-Ig       |
| Zombie Aqua™ Fixable Viability Kit                  | BioLegend                 | 423101           |
| APC/Cyanine7 anti-mouse CD45                        | BioLegend                 | 144718           |
| FITC anti-mouse/human CD11b                         | BioLegend                 | 101205           |
| APC anti-mouse Ly-6C Antibody                       | BioLegend                 | 128015           |
| PE/Cyanine7 anti-mouse Ly-6G                        | BioLegend                 | 127617           |
| Brilliant Violet 421™ anti-mouse F4/80              | BioLegend                 | 123131           |
| PerCP/Cyanine5.5 anti-mouse CD3                     | BioLegend                 | 100127           |
| APC anti-mouse CD19                                 | BioLegend                 | 152409           |
| PE anti-Th-POK (ZFP-67) Antibody                    | BioLegend                 | 656403           |
| FITC anti-mouse CD4 Antibody                        | BioLegend                 | 100405           |
| PE/Cyanine7 anti-mouse CD8a Antibody                | BioLegend                 | 100721           |

|                                                                  |        |
|------------------------------------------------------------------|--------|
| PerCP/Cyanine5.5 anti-mouse CD170 (Siglec-F) Antibody BioLegend  | 155525 |
| Brilliant Violet 785™ anti-mouse CD64 (FcγRI) Antibody BioLegend | 139340 |

---

**Extended Data Table 4** | siRNA used in this study

| Gene         | Primers   | Sequence (5' - 3')    | Application      |
|--------------|-----------|-----------------------|------------------|
| <i>Pink1</i> | sense     | CUGGCUGACUAUCCUGAUATT | RNA interference |
| <i>Pink1</i> | antisense | UAUCAGGAUAGUCAGCCAGTT | RNA interference |

**Extended Data Table 5** Oligos used in this study

| Gene                               | Primers | Sequence (5' - 3')         | Application |
|------------------------------------|---------|----------------------------|-------------|
| <i>Gapdh</i> (mouse)               | Forward | AGAAGGTGGTGAAGCAGGCATC     | RT-qPCR     |
|                                    | Reverse | CGAAGGTGGAAGAGTGGGAGTTG    | RT-qPCR     |
| <i>Zbtb7b</i> (mouse)              | Forward | TGAAGGTGAGGAAGAAGAGGAGGAG  | RT-qPCR     |
|                                    | Reverse | GCGAACTTAGGTAAGCCATCAGGTC  | RT-qPCR     |
| <i>Cmpk2</i> (mouse)               | Forward | CCAGTGGAGGAAGATCTTTGAT     | RT-qPCR     |
|                                    | Reverse | TTAGCTATTTTCAGAAGCCACGA    | RT-qPCR     |
| <i>Il6</i> (mouse)                 | Forward | TAGTCCTTCCTACCCCAATTTCC    | RT-qPCR     |
|                                    | Reverse | TTGGTCCTTAGCCACTCCTTC      | RT-qPCR     |
| <i>Il1b</i> (mouse)                | Forward | GCAACTGTTCCTGAACTCAACT     | RT-qPCR     |
|                                    | Reverse | ATCTTTTGGGGTCCGTCAACT      | RT-qPCR     |
| <i>mt-Nd2</i> (mouse)              | Forward | TCACAATATCCAGCACCAACCT     | RT-qPCR     |
|                                    | Reverse | GCTGTTGCTTGTGTGACGAA       | RT-qPCR     |
| <i>B2m</i> (mouse)                 | Forward | ATGGGAAGCCGAACATACTG       | RT-qPCR     |
|                                    | Reverse | CAGTCTCAGTGGGGGTGAAT       | RT-qPCR     |
| <i>Tert</i> (mouse)                | Forward | CTAGCTCATGTGTCAAGACCCTCTT  | RT-qPCR     |
|                                    | Reverse | GCCAGCACGTTTCTCTCGTT       | RT-qPCR     |
| <i>GAPDH</i> (human)               | Forward | CAGTCCATGCCATCACTGCCACCCAG | RT-qPCR     |
|                                    | Reverse | CAGTGTAGCCCAGGATGCCCTTGAG  | RT-qPCR     |
| <i>ZBTB7B</i> (human)              | Forward | TCGCTGCTTGCATGGAGATTCTG    | RT-qPCR     |
|                                    | Reverse | GGACTGTCTTCACCATTGGGAACTC  | RT-qPCR     |
| <i>CMPK2</i> (human)               | Forward | ACCTTATCCTGCTGCTCACTGTG    | RT-qPCR     |
|                                    | Reverse | CTGCTTCTTCCCTGGTCTTCTCC    | RT-qPCR     |
| <i>RSAD2</i> (human)               | Forward | CGTGAGCATCGTGAGCAATG       | RT-qPCR     |
|                                    | Reverse | TCTTCTTTCCTTGGCCACGG       | RT-qPCR     |
| <i>EPST11</i> (human)              | Forward | ACCGCTGAGTTCTTGAGCAA       | RT-qPCR     |
|                                    | Reverse | CAGCTGTGATCCCTAGGCAG       | RT-qPCR     |
| <i>IL6</i> (human)                 | Forward | GTA AATGGGATTCCAACACGAACAA | RT-qPCR     |
|                                    | Reverse | TGTCGTGCAGTAACAACCAACTC    | RT-qPCR     |
| <i>IL1B</i> (human)                | Forward | ATGATGGCTTATTACAGTGGCAA    | RT-qPCR     |
|                                    | Reverse | GTCGGAGATTCGTAGCTGGA       | RT-qPCR     |
| <i>IL10</i> (human)                | Forward | CCCAAGCTGAGAACCAAGAC       | RT-qPCR     |
|                                    | Reverse | AAGGCATTCTTCACCTGCTC       | RT-qPCR     |
| <i>Zbtb7b</i> -flox (mouse)        | Forward | AAAGTATCAGGACTGACCTGCCT    | Genotyping  |
|                                    | Reverse | TCCTGTTACACAAGAAGGGGT      | Genotyping  |
| <i>Lyz2</i> -cre wild type (mouse) | Forward | CTTGGGCTGCCAGAATTTCTC      | Genotyping  |
|                                    | Reverse | TTACAGTCGGCCAGGCTGAC       | Genotyping  |
| <i>Lyz2</i> -cre mutant (mouse)    | Forward | CTTGGGCTGCCAGAATTTCTC      | Genotyping  |
|                                    | Reverse | CCCAGAAATGCCAGATTACG       | Genotyping  |
| <i>Cmpk2</i> promoter              | Forward | TTGATGCAGGAAATTTTGATTGGC   | ChIP-qPCR   |
|                                    | Reverse | GCTCACGTGGGATGCAAAC        | ChIP-qPCR   |
